# Supplementary material for: Peeking into the Stingers: A Comprehensive SWATH-MS Study of the European Hornet Vespa crabro (Linnaeus, 1758) (Hymenoptera: Vespidae) Venom Sac Extracts
Source: MDPI journal article supplement (doi:10.3390/ijms25073798), 2024-03-28
Supplement: s1 [file s1]

# Peeking into the Stingers: A Comprehensive SWATH-MS Study of the European Hornet *Vespa crabro* (Linnaeus, 1758) (Hymenoptera: Vespidae) Venom Sac Extracts

Xesús Feás, Manuela Alonso-Sampedro, Susana Belén Bravo and Carmen Vidal

**Table S1.** Proteins from class Insecta with upregulated expression in *Vespa crabro* gynes venom sac extract.

| Protein                                                               | Uniprot code | Species                      | P Value ( <i>t</i> test) | FC<br>(VSE-G/VSE-W) |
|-----------------------------------------------------------------------|--------------|------------------------------|--------------------------|---------------------|
| <b>Glycogen debranching enzyme family</b>                             |              |                              |                          |                     |
| Glycogen debranching enzyme                                           | A0A7M7M151   | <i>Apis mellifera</i>        | 0.004                    | 40.141              |
| <b>Hexokinase family</b>                                              |              |                              |                          |                     |
| Phosphotransferase                                                    | A0A6P5HFS8   | <i>Bombus terrestris</i>     | < 0.001                  | 15.077              |
|                                                                       | A0A154PKM2   | <i>Dufourea novaeangliae</i> | 0.004                    | 2.744               |
| <b>Class I fructose-bisphosphate aldolase family</b>                  |              |                              |                          |                     |
| Fructose-bisphosphate aldolase                                        | V9IF40       | <i>Apis cerana</i>           | < 0.001                  | 12.933              |
| <b>Calponin family</b>                                                |              |                              |                          |                     |
| Transgelin                                                            | A0A7M7GX24   | <i>Apis mellifera</i>        | 0.006                    | 12.766              |
|                                                                       | A0A6P3UBY6   | <i>Bombus terrestris</i>     | < 0.001                  | 4.731               |
| <b>Glycogen phosphorylase family</b>                                  |              |                              |                          |                     |
| Alpha-1,4 glucan phosphorylase                                        | A0A6P5I5Q8   | <i>Bombus terrestris</i>     | < 0.001                  | 10.623              |
|                                                                       | A0A154PP88   | <i>Dufourea novaeangliae</i> | < 0.001                  | 10.014              |
|                                                                       | A0A7M7GQ45   | <i>Apis mellifera</i>        | 0.001                    | 6.047               |
| <b>Actin family</b>                                                   |              |                              |                          |                     |
| Actin, indirect flight muscle                                         | V9IG73       | <i>Apis cerana</i>           | 0.028                    | 10.101              |
| actin-interacting protein 1 isoform X1                                | A0A6P3DB16   | <i>Bombus terrestris</i>     | 0.004                    | 4.993               |
| <b>Heat shock protein family</b>                                      |              |                              |                          |                     |
| heat shock protein beta-1 isoform X2                                  | A0A6P3DLV5   | <i>Bombus terrestris</i>     | < 0.001                  | 9.777               |
| heat shock 70 kDa protein 4 isoform X2                                | A0A6P3UJ18   | <i>Bombus terrestris</i>     | 0.018                    | 1.761               |
| <b>Protein kinase superfamily, CAMK Ser/Thr protein kinase family</b> |              |                              |                          |                     |
| Titin                                                                 | A0A833W593   | <i>Frieseomelitta varia</i>  | < 0.001                  | 7.688               |

|                                                                      |            |                              |         |        |
|----------------------------------------------------------------------|------------|------------------------------|---------|--------|
| twitchin isoform X2                                                  | A0A6P5I2Y9 | <i>Bombus terrestris</i>     | 0.003   | 12.711 |
| Twitchin                                                             | A0A154PIM3 | <i>Dufourea novaeangliae</i> | 0.002   | 2.201  |
| <b>WD repeat EIF2A family</b>                                        |            |                              |         |        |
| Eukaryotic translation initiation factor 2A                          | A0A7M7RBB8 | <i>Apis mellifera</i>        | < 0.001 | 7.264  |
| <b>GPI family</b>                                                    |            |                              |         |        |
| Glucose-6-phosphate isomerase                                        | R9QKY2     | <i>Bombus humilis</i>        | 0.042   | 6.371  |
| <b>ATPase alpha/beta chains family</b>                               |            |                              |         |        |
| ATP synthase subunit beta                                            | A0A833VWR2 | <i>Frieseomelitta varia</i>  | 0.016   | 5.725  |
| ATP synthase subunit alpha                                           | V9IFD6     | <i>Apis cerana</i>           | 0.046   | 2.512  |
| <b>Alpha-ketoglutarate dehydrogenase family</b>                      |            |                              |         |        |
| oxoglutarate dehydrogenase                                           | A0A154P1T4 | <i>Dufourea novaeangliae</i> | 0.044   | 5.271  |
| <b>Citrate synthase family</b>                                       |            |                              |         |        |
| Citrate synthase                                                     | A0A154PEK6 | <i>Dufourea novaeangliae</i> | < 0.001 | 5.199  |
| <b>6-phosphogluconate dehydrogenase family</b>                       |            |                              |         |        |
| 6-phosphogluconate dehydrogenase, decarboxylating                    | A0A833W8Q7 | <i>Frieseomelitta varia</i>  | 0.041   | 4.594  |
| <b>Malic enzymes family</b>                                          |            |                              |         |        |
| Malic enzyme                                                         | A0A154PKU8 | <i>Dufourea novaeangliae</i> | < 0.001 | 4.534  |
|                                                                      | A0A6P3DJM2 | <i>Bombus terrestris</i>     | 0.013   | 2.787  |
|                                                                      | A0A833S1K4 | <i>Frieseomelitta varia</i>  | 0.016   | 2.013  |
| <b>Phosphohexose mutase family</b>                                   |            |                              |         |        |
| phosphoglucomutase (alpha-D-glucose-1,6-bisphosphate-dependent)      | A0A154PH97 | <i>Dufourea novaeangliae</i> | 0.005   | 4.135  |
| <b>Class-I pyridoxal-phosphate-dependent aminotransferase family</b> |            |                              |         |        |
| alanine transaminase                                                 | V9IKQ3     | <i>Apis cerana</i>           | < 0.001 | 3.878  |
| <b>Cation transport ATPase (P-type) (TC 3.A.3) family</b>            |            |                              |         |        |
| Calcium-transporting ATPase                                          | A0A833WFE3 | <i>Frieseomelitta varia</i>  | 0.025   | 3.694  |
| <b>ATPase alpha/beta chains family</b>                               |            |                              |         |        |
| H(+)-transporting two-sector ATPase                                  | A0A833W0Z5 | <i>Frieseomelitta varia</i>  | 0.016   | 3.562  |
| <b>Classic translation factor GTPase family</b>                      |            |                              |         |        |
| Elongation factor 1-alpha                                            | A0A154P1Q6 | <i>Dufourea novaeangliae</i> | 0.026   | 3.388  |
| <b>Transaldolase family</b>                                          |            |                              |         |        |
| Transaldolase                                                        | A0A154P208 | <i>Dufourea novaeangliae</i> | < 0.001 | 3.150  |
| <b>Pyruvate kinase family</b>                                        |            |                              |         |        |
| Pyruvate kinase                                                      | A0A154PSS0 | <i>Dufourea novaeangliae</i> | 0.001   | 3.112  |

|                                                                 |            |                              |         |        |
|-----------------------------------------------------------------|------------|------------------------------|---------|--------|
| <b>MDH type 1 family</b>                                        |            |                              |         |        |
| Malate dehydrogenase                                            | A0A154PN63 | <i>Dufourea novaeangliae</i> | 0.007   | 3.004  |
| <b>Actin-binding proteins ADF family</b>                        |            |                              |         |        |
| Cofilin/actin-depolymerizing factor                             | V9II66     | <i>Apis cerana</i>           | < 0.001 | 2.025  |
| <b>Peptidase M1 family</b>                                      |            |                              |         |        |
| Aminopeptidase                                                  | A0A833S8G1 | <i>Frieseomelitta varia</i>  | 0.007   | 1.924  |
| <b>Succinate/malate CoA ligase beta subunit family</b>          |            |                              |         |        |
| Succinate--CoA ligase [ADP-forming] subunit beta, mitochondrial | A0A833SBT7 | <i>Frieseomelitta varia</i>  | 0.044   | 1.901  |
| <b>No family described</b>                                      |            |                              |         |        |
| UTP--glucose-1-phosphate uridylyltransferase                    | A0A6P3UDI8 | <i>Bombus terrestris</i>     | 0.021   | 2.284  |
| Stress-induced-phosphoprotein 1                                 | V9IJY9     | <i>Apis cerana</i>           | 0.004   | 3.752  |
| Phosphoglycerate kinase                                         | A0A6P3U6Z7 | <i>Bombus terrestris</i>     | 0.045   | 2.293  |
| Myosin light chain alkali                                       | V9IF54     | <i>Apis cerana</i>           | 0.039   | 30.289 |
| muscle LIM protein Mlp84B isoform X2                            | A0A7M7TFB5 | <i>Apis mellifera</i>        | 0.016   | 34.597 |
| Multifunctional fusion protein                                  | A0A6P3DM36 | <i>Bombus terrestris</i>     | 0.049   | 2.005  |
| LOW QUALITY PROTEIN: protein dj-1beta                           | A0A6P3DG00 | <i>Bombus terrestris</i>     | 0.001   | 4.927  |
| lamin-C isoform X2                                              | A0A6P3U6Y5 | <i>Bombus terrestris</i>     | 0.001   | 3.327  |
| Lactoylglutathione lyase                                        | A0A6P3UJ80 | <i>Bombus terrestris</i>     | 0.006   | 2.104  |
| Glyceraldehyde-3-phosphate dehydrogenase                        | A0A6P3DDE1 | <i>Bombus terrestris</i>     | 0.002   | 10.925 |
| Glutathione S-transferase                                       | V9IJF3     | <i>Apis cerana</i>           | < 0.001 | 7.419  |
| Amphiphysin                                                     | V9ILS0     | <i>Apis cerana</i>           | 0.001   | 4.341  |
| alpha-actinin, sarcomeric isoform X1                            | A0A6P3U6D2 | <i>Bombus terrestris</i>     | 0.001   | 5.621  |
| aldose reductase                                                | A0A7M7RB96 | <i>Apis mellifera</i>        | 0.001   | 4.080  |
| 1,4-alpha-glucan branching enzyme                               | A0A6P3TVX5 | <i>Bombus terrestris</i>     | 0.031   | 9.448  |
| Vitellogenin                                                    | G8IIT0     | <i>Vespula vulgaris</i>      | < 0.001 | 17.755 |
| troponin T, skeletal muscle isoform X3                          | A0A6P5I4V8 | <i>Bombus terrestris</i>     | 0.004   | 6.312  |
| troponin C type I isoform X3                                    | A0A7M7GV60 | <i>Apis mellifera</i>        | 0.033   | 2.457  |
| talin-1 isoform X1                                              | A0A7M7SRL2 | <i>Apis mellifera</i>        | 0.038   | 1.779  |
| LIM domain-binding protein                                      | A0A2A3EBK6 | <i>Apis cerana cerana</i>    | 0.007   | 2.388  |
| Nidogen                                                         | A0A833W2G7 | <i>Frieseomelitta varia</i>  | 0.007   | 2.081  |
| Chemosensory protein                                            | Q5Q049     | <i>Vespa crabro</i>          | < 0.001 | 3.476  |
| peptidylprolyl isomerase                                        | V9IL23     | <i>Apis cerana</i>           | 0.041   | 1.594  |

VSE-G, *Vespa crabro* gyne venom sac extract; VSE-W, *Vespa crabro* worker venom sac extract; FC (VSE-G/VSE-W), fold change of gyne/worker; FC > 1, upregulated protein in VSE-G; Statistical differences by *t* Test, *p* < 0.05.

**Table S2.** Proteins from class Insecta with downregulated expression in *Vespa crabro* gynes venom sac extract.

| Protein                                                                        | Uniprot code | Species                      | P Value ( <i>t</i> test) | FC<br>(VSE-G/VSE-W) |
|--------------------------------------------------------------------------------|--------------|------------------------------|--------------------------|---------------------|
| <b>CRISP family</b>                                                            |              |                              |                          |                     |
| Venom allergen 5                                                               | P0DMB9       | <i>Vespa velutina</i>        | 0.006                    | 0.026               |
| <b>Lipase family</b>                                                           |              |                              |                          |                     |
| Phospholipase A1                                                               | C0HLL3       | <i>Vespa velutina</i>        | < 0.001                  | 0.052               |
| Phospholipase A1 verutoxin-2b                                                  | P0DMB8       | <i>Vespa velutina</i>        | 0.041                    | 0.089               |
| <b>Peroxiredoxin family</b>                                                    |              |                              |                          |                     |
| Peroxiredoxin-6                                                                | V9IET2       | <i>Apis cerana</i>           | 0.042                    | 0.321               |
| <b>2-oxoacid dehydrogenase family</b>                                          |              |                              |                          |                     |
| Dihydrolipoamide acetyltransferase component of pyruvate dehydrogenase complex | A0A7M7R8J0   | <i>Apis mellifera</i>        | 0.012                    | 0.125               |
| <b>MAM33 family</b>                                                            |              |                              |                          |                     |
| Ras-related protein Rab-43                                                     | A0A833W2V6   | <i>Frieseomelitta varia</i>  | 0.011                    | 0.136               |
| <b>Prohibitin family</b>                                                       |              |                              |                          |                     |
| Prohibitin                                                                     | V9IIF6       | <i>Apis cerana</i>           | 0.412                    | 0.148               |
| <b>Glycosyl hydrolase family</b>                                               |              |                              |                          |                     |
| Hyaluronidase A                                                                | C0HLL4       | <i>Vespa velutina</i>        | 0.001                    | 0.148               |
| Hyaluronidase B                                                                | C0HLL5       | <i>Vespa velutina</i>        | < 0.001                  | 0.280               |
| Alpha-galactosidase                                                            | A0A7M7H421   | <i>Apis mellifera</i>        | 0.001                    | 0.390               |
| <b>Peptidase family</b>                                                        |              |                              |                          |                     |
| Aminopeptidase                                                                 | A0A154PMQ1   | <i>Dufourea novaeangliae</i> | 0.021                    | 0.186               |
|                                                                                | A0A833RCD6   | <i>Frieseomelitta varia</i>  | 0.013                    | 0.325               |
| Proteasome subunit alpha type                                                  | A0A833W9A3   | <i>Frieseomelitta varia</i>  | < 0.001                  | 0.313               |
| <b>Cu-Zn superoxide dismutase family</b>                                       |              |                              |                          |                     |
| Superoxide dismutase [Cu-Zn]                                                   | A0A7M7MMK3   | <i>Apis mellifera</i>        | < 0.001                  | 0.205               |
| <b>Aldehyde dehydrogenase family</b>                                           |              |                              |                          |                     |
| Retinal dehydrogenase                                                          | A0A2A3EJU2   | <i>Apis cerana cerana</i>    | 0.028                    | 0.257               |
| <b>Glyceraldehyde-3-phosphate dehydrogenase family</b>                         |              |                              |                          |                     |
| Glyceraldehyde-3-phosphate dehydrogenase                                       | A0A088AHC8   | <i>Apis mellifera</i>        | < 0.001                  | 0.274               |
| <b>NAD-dependent glycerol-3-phosphate dehydrogenase family</b>                 |              |                              |                          |                     |

|                                                                    |            |                              |         |       |
|--------------------------------------------------------------------|------------|------------------------------|---------|-------|
| Glycerol-3-phosphate dehydrogenase [NAD(+)]                        | A0A154PH44 | <i>Dufourea novaeangliae</i> | 0.022   | 0.308 |
| <b>Triosephosphate isomerase family</b>                            |            |                              |         |       |
| Triosephosphate isomerase                                          | A4ZXC4     | <i>Apis mellifera</i>        | 0.016   | 0.282 |
| <b>Class-I pyridine nucleotide-disulfide oxidoreductase family</b> |            |                              |         |       |
| Dihydrolipoyl dehydrogenase                                        | A0A7M7R758 | <i>Apis mellifera</i>        | 0.034   | 0.369 |
| <b>Heat shock protein family</b>                                   |            |                              |         |       |
| Heat shock protein 83                                              | A0A154PI85 | <i>Dufourea novaeangliae</i> | 0.047   | 0.604 |
| <b>No family described</b>                                         |            |                              |         |       |
| carbonyl reductase (NADPH)                                         | A0A6P3DFV2 | <i>Bombus terrestris</i>     | 0.047   | 0.193 |
| Chemosensory protein 1                                             | A0A384ZVP9 | <i>Vespa velutina</i>        | 0.001   | 0.302 |
| Calcium-transporting ATPase                                        | A0A6P5I2P0 | <i>Bombus terrestris</i>     | 0.030   | 0.249 |
| Hornet silk protein Vssilk 4                                       | D6RU88     | <i>Vespa xanthoptera</i>     | 0.032   | 0.312 |
| Hornet silk protein Vssilk 3                                       | A9CMG8     | <i>Vespa xanthoptera</i>     | 0.033   | 0.454 |
| Dipeptidylpeptidase IV                                             | A4UA14     | <i>Vespa basalis</i>         | 0.015   | 0.216 |
| Anticoagulant serine protease                                      | B7SD94     | <i>Vespa magnifica</i>       | < 0.001 | 0.150 |
| Calmodulin                                                         | V9I7W9     | <i>Apis cerana</i>           | 0.025   | 0.052 |
| alpha-glucosidase                                                  | L7ZBB3     | <i>Apis cerana indica</i>    | < 0.001 | 0.066 |
|                                                                    | Q25BT7     | <i>Apis mellifera</i>        | 0.005   | 0.225 |
|                                                                    | A0A6P3DPJ9 | <i>Bombus terrestris</i>     | 0.037   | 0.301 |
| uncharacterized protein LOC100642610                               | A0A6P3U365 | <i>Bombus terrestris</i>     | 0.025   | 0.114 |

VSE-G, *Vespa crabro* gyne venom sac extract; VSE-W, *Vespa crabro* worker venom sac extract; FC (VSE-G/VSE-W), fold change of gyne/worker; FC > 1, upregulated protein in VSE-G; Statistical differences by *t* Test, *p* < 0.05.
