# Supplementary material for: Peeking into the Stingers: A Comprehensive SWATH-MS Study of the European Hornet Vespa crabro (Linnaeus, 1758) (Hymenoptera: Vespidae) Venom Sac Extracts
Source: Int J Mol Sci. 2024 Mar 28;25(7):3798. doi: 10.3390/ijms25073798 (PMC11011553; doi:10.3390/ijms25073798)
Supplement: Supplementary file 1 [file ijms-25-03798-s001.zip]

Archive with 4 entries (4 files):
- Supplementary Figures S1, S2 and S3.pdf
- Supplementary File S1.xlsx
- Supplementary File S2.xlsx
- Supplementary Tables S1 and S2.pdf
