# Supplementary material for: Peeking into the Stingers: A Comprehensive SWATH-MS Study of the European Hornet Vespa crabro (Linnaeus, 1758) (Hymenoptera: Vespidae) Venom Sac Extracts
Source: Int J Mol Sci. 2024 Mar 28;25(7):3798. doi: 10.3390/ijms25073798 (PMC11011553; doi:10.3390/ijms25073798)
Supplement: Supplementary file 1 [file ijms-25-03798-s001.zip › Supplementary File S1.xlsx]

## Sheet: MLR normalized areas
				MLR normalized areas
				Gyne venom sac extract pooled samples				Worker venom sac extract pooled samples
n	Uniprot code	Group	Protein	VSE-G_1	VSE-G_2	VSE-G_3	VSE-G_4	VSE-W_1	VSE-W_2	VSE-W_3	VSE-W_4
1	tr|A0A1V9XXZ1|A0A1V9XXZ1	9ACAR	Histone H4 OS=Tropilaelaps mercedesae OX=418985 GN=BIW11	29646	10589	30417	45338	41962	62003	41176	97989
2	tr|A0A1V9X4H1|A0A1V9X4H1	9ACAR	vesicle-fusing ATPase OS=Tropilaelaps mercedesae OX=418985 GN=BIW11	636.35	1048.5	2942.4	1273.3	2446.8	1751.8	4023.9	1841.5
3	tr|A0A1B1VVK2|A0A1B1VVK2	9COLE	arginine kinase (Fragment) OS=Anchycteis velutina OX=1605641 PE=3 SV=1	4907.1	947.68	15741	13956	2607	0	5678.1	3228.2
4	tr|A0A0L0AQN9|A0A0L0AQN9	9ENTR	Major outer membrane lipoprotein Lpp OS=Klebsiella sp. RIT-PI-d OX=1681196 GN=lpp PE=3 SV=1	4723.5	2547.8	4698.2	12183	11512	13175	34771	39727
5	tr|Q17TA6|Q17TA6	9HYME	arginine kinase (Fragment) OS=Bombus festivus OX=309958 GN=ArgK PE=3 SV=1	18366	7119.3	82959	62554	72031	17623	23587	32171
6	tr|Q8WRL1|Q8WRL1	9HYME	Elongation factor 1-alpha (Fragment) OS=Agapostemon leunculus OX=178016 PE=3 SV=1	7585.7	31434	18915	22176	16507	15166	8828.4	3281
7	tr|A0A833S1C5|A0A833S1C5	9HYME	Spectrin alpha chain OS=Frieseomelitta varia OX=561572 GN=E2986	43336	30529	14154	35106	32546	31260	36376	15799
8	tr|A0A833SA96|A0A833SA96	9HYME	Nucleoside diphosphate kinase OS=Frieseomelitta varia OX=561572 GN=E2986	5501	823.28	6634.4	7829	4940.4	4556.5	12890	5946.9
9	tr|A0A833S1K4|A0A833S1K4	9HYME	Malic enzyme OS=Frieseomelitta varia OX=561572 GN=E2986	180410	196260	123060	125950	61295	86750	47198	115480
10	tr|A0A833S7R5|A0A833S7R5	9HYME	Twitchin OS=Frieseomelitta varia OX=561572 GN=E2986	29279	34109	2875.5	8907.2	15474	47482	13307	4246.4
11	tr|A0A833W0Z5|A0A833W0Z5	9HYME	H(+)-transporting two-sector ATPase OS=Frieseomelitta varia OX=561572 GN=E2986	39669	12767	29996	23300	6131	8866	5590.1	9092.4
12	tr|A0A833S5I5|A0A833S5I5	9HYME	Phosphoglycerate kinase OS=Frieseomelitta varia OX=561572 GN=E2986	78682	15295	163880	149600	100020	21187	17009	15882
13	tr|A0A833RN92|A0A833RN92	9HYME	Pyruvate carboxylase OS=Frieseomelitta varia OX=561572 GN=E2986	18639	14160	19711	23935	16225	25751	13257	28421
14	tr|A0A833SBT7|A0A833SBT7	9HYME	Succinate--CoA ligase [ADP-forming] subunit beta, mitochondrial OS=Frieseomelitta varia OX=561572 GN=E2986	141310	78629	179120	136070	78047	106950	50161	46229
15	tr|A0A833W9E6|A0A833W9E6	9HYME	Dihydrolipoyl dehydrogenase OS=Frieseomelitta varia OX=561572 GN=E2986	55443	22866	51425	59714	29379	16057	27143	42980
16	tr|A0A833W593|A0A833W593	9HYME	Titin OS=Frieseomelitta varia OX=561572 GN=E2986	131840	90261	114970	83260	8045.7	5694.8	13742	27190
17	tr|A0A833W9A3|A0A833W9A3	9HYME	Proteasome subunit alpha type OS=Frieseomelitta varia OX=561572 GN=E2986	9332.2	8396.7	9014.2	12048	33290	30997	27080	32534
18	tr|A0A833RCD6|A0A833RCD6	9HYME	Aminopeptidase OS=Frieseomelitta varia OX=561572 GN=E2986	11989	17116	17730	13061	34177	70256	31738	48026
19	tr|A0A833RRC8|A0A833RRC8	9HYME	Thioredoxin reductase 1, mitochondrial OS=Frieseomelitta varia OX=561572 GN=E2986	184870	140870	136740	134840	88645	120840	107790	204300
20	tr|A0A833W2G7|A0A833W2G7	9HYME	Nidogen OS=Frieseomelitta varia OX=561572 GN=E2986	18576	11571	17972	20403	6081.9	11368	7973.4	7497.7
21	tr|A0A833SC55|A0A833SC55	9HYME	Rab GDP dissociation inhibitor OS=Frieseomelitta varia OX=561572 GN=E2986	5785.6	6463	6636.8	5471.4	5930	53852	46897	2087.8
22	tr|A0A833S8G1|A0A833S8G1	9HYME	Aminopeptidase OS=Frieseomelitta varia OX=561572 GN=E2986	21821	22550	29318	22575	8073.4	8990.3	16076	16886
23	tr|A0A833RSF2|A0A833RSF2	9HYME	Succinate dehydrogenase [ubiquinone] flavoprotein subunit, mitochondrial OS=Frieseomelitta varia OX=561572 GN=E2986	187.76	2822.9	4965.1	3948.8	12716	3017.7	5450.1	4923.3
24	tr|A0A833S6L6|A0A833S6L6	9HYME	arginine kinase OS=Frieseomelitta varia OX=561572 GN=E2986	2112.5	3357.7	1344.1	1891.5	48802	2897.3	38161	2226.8
25	tr|A0A833W2V6|A0A833W2V6	9HYME	Ras-related protein Rab-43 OS=Frieseomelitta varia OX=561572 GN=E2986	3739.8	2095.1	1829.3	4115.4	27633	28272	23790	6360.7
26	tr|A0A833WFE3|A0A833WFE3	9HYME	Calcium-transporting ATPase OS=Frieseomelitta varia OX=561572 GN=E2986	12300	12720	3887.1	16888	5077.3	3625.7	1589.7	2101.4
27	tr|A0A833RF82|A0A833RF82	9HYME	fumarate hydratase OS=Frieseomelitta varia OX=561572 GN=E2986	46263	29819	55540	37577	43104	21827	14933	21281
28	tr|A0A833SBP4|A0A833SBP4	9HYME	Glycoside hydrolase family 31 N-terminal domain-containing protein OS=Frieseomelitta varia OX=561572 GN=E2986_05199 PE=3 SV=1	3813.4	831.28	3471.9	4293.6	28674	40216	65740	2162.9
29	tr|A0A833VPP9|A0A833VPP9	9HYME	ornithine aminotransferase OS=Frieseomelitta varia OX=561572 GN=E2986	188.55	892.03	231.79	363.61	1107.5	0	5056.4	783.46
30	tr|A0A833W8Q7|A0A833W8Q7	9HYME	6-phosphogluconate dehydrogenase, decarboxylating OS=Frieseomelitta varia OX=561572 GN=E2986	29180	7264.1	52314	37819	4148.6	3639.9	10930	8829
31	tr|A0A833R489|A0A833R489	9HYME	Superoxide dismutase OS=Frieseomelitta varia OX=561572 GN=E2986	31362	22758	30023	32798	20279	11220	10889	35436
32	tr|A0A833RNQ4|A0A833RNQ4	9HYME	N-sulfoglucosamine sulfohydrolase OS=Frieseomelitta varia OX=561572 GN=E2986	918.51	3908.6	3626.2	4345.6	5118.4	19604	13139	5285.8
33	tr|A0A833VWR2|A0A833VWR2	9HYME	ATP synthase subunit beta OS=Frieseomelitta varia OX=561572 GN=E2986	74410	19575	68401	93472	14381	5817.7	4795.2	19695
34	tr|A0A833W1S3|A0A833W1S3	9HYME	Glucosamine-6-phosphate isomerase OS=Frieseomelitta varia OX=561572 GN=E2986	22942	18659	20499	20348	18227	20628	14359	26220
35	tr|A0A1C4ADY6|A0A1C4ADY6	9LACO	TetR family transcriptional regulator OS=Lactobacillus apis OX=303541 GN=GCM10007323	531870	608750	551480	642100	3121700	3260100	3982300	2533900
36	tr|A0A089XL96|A0A089XL96	9LACT	Glyceraldehyde-3-phosphate dehydrogenase OS=Lactococcus lactis OX=1358 GN=gap	2851.7	1453	14994	4742.3	7311.5	5333.1	13669	5761
37	tr|T0L0J8|T0L0J8	9MICR	Pyrimidine 5-nucleotidase OS=Nosema apis BRL 01 OX=1037528 GN=NAPIS	7841.3	2105.1	3534.2	9299	9177.2	6692.7	3639.9	5603.5
38	tr|A0A821LMA2|A0A821LMA2	9NEOB	(mimic poison frog) hypothetical protein OS=Ranitomeya imitator OX=111125 GN=RIMITATOR	190410	207670	74438	66120	931990	251710	1076600	129400
39	tr|A0A822GLX5|A0A822GLX5	9NEOB	Serotransferrin OS=Ranitomeya imitator OX=111125 GN=RIMITATOR	16066	19119	19596	26272	54186	81652	102250	41978
40	tr|A0A821C5G8|A0A821C5G8	9NEOB	Vacuolar proton pump subunit B OS=Ranitomeya imitator OX=111125 GN=RIMITATOR	67103	28967	43939	44888	33102	24443	22609	26511
41	tr|A0A821XWY2|A0A821XWY2	9NEOB	(mimic poison frog) hypothetical protein OS=Ranitomeya imitator OX=111125 GN=RIMITATOR	1582.5	1382.8	1567	339.75	1792.2	2566.9	5531.3	457620
42	tr|A0A821Z0Z9|A0A821Z0Z9	9NEOB	(mimic poison frog) hypothetical protein OS=Ranitomeya imitator OX=111125 GN=RIMITATOR	648.86	2587.8	2668.1	2158.7	3512.9	6740.3	6310	1425000
43	tr|A0A821UX93|A0A821UX93	9NEOB	(mimic poison frog) hypothetical protein OS=Ranitomeya imitator OX=111125 GN=RIMITATOR	28726	29105	18481	21748	48887	61533	64132	36500
44	tr|A0A822FRT2|A0A822FRT2	9NEOB	(mimic poison frog) hypothetical protein OS=Ranitomeya imitator OX=111125 GN=RIMITATOR	309970	318920	328890	377400	1809600	1268800	875740	1087300
45	tr|A0A822HYL0|A0A822HYL0	9NEOB	(mimic poison frog) hypothetical protein (Fragment) OS=Ranitomeya imitator OX=111125 GN=RIMITATOR	249260	231500	150930	145410	328840	331040	305670	396260
46	tr|A0A821Q934|A0A821Q934	9NEOB	Pentaxin OS=Ranitomeya imitator OX=111125 GN=RIMITATOR	9312.6	8604.9	11208	2902.2	14190	13062	12634	62429
47	tr|A0A821PRI4|A0A821PRI4	9NEOB	(mimic poison frog) hypothetical protein OS=Ranitomeya imitator OX=111125 GN=RIMITATOR	2731.7	2934.1	1445.1	4852.1	1322.9	8075.1	2020.5	12374
48	tr|A0A822I5U0|A0A822I5U0	9NEOB	(mimic poison frog) hypothetical protein OS=Ranitomeya imitator OX=111125 GN=RIMITATOR	2980.9	3181	2745.5	3136.4	2016.8	2777.3	0	7560.9
49	tr|A0A821LTU2|A0A821LTU2	9NEOB	Glyceraldehyde-3-phosphate dehydrogenase OS=Ranitomeya imitator OX=111125 GN=RIMITATOR	1491.6	2740.2	1781.5	8536.9	24539	12404	12167	13982
50	tr|A0A822AXZ5|A0A822AXZ5	9NEOB	(mimic poison frog) hypothetical protein OS=Ranitomeya imitator OX=111125 GN=RIMITATOR	3091.9	4394.9	9150.7	2901.5	14247	8216.1	11083	9104.6
51	tr|A0A821TAG2|A0A821TAG2	9NEOB	Proteasome subunit alpha type OS=Ranitomeya imitator OX=111125 GN=RIMITATOR	2583.4	441.05	2692	695.37	3503.4	5352.6	3185.7	8038.9
52	tr|A0A822ID78|A0A822ID78	9NEOB	(mimic poison frog) hypothetical protein (Fragment) OS=Ranitomeya imitator OX=111125 GN=RIMITATOR	1221.7	1428.2	4289.9	7331.6	22647	16708	16111	10522
53	tr|A0A821APD0|A0A821APD0	9NEOB	(mimic poison frog) hypothetical protein OS=Ranitomeya imitator OX=111125 GN=RIMITATOR	2809.8	3423.3	6638.1	8166.4	3443.9	6586.9	28429	6793.1
54	tr|A0A822IFE0|A0A822IFE0	9NEOB	H(+)-transporting two-sector ATPase OS=Ranitomeya imitator OX=111125 GN=RIMITATOR	9269.9	1572.7	6336.1	7816.2	2758.9	4550.6	8399.8	3256
55	tr|A0A2I9LNP4|A0A2I9LNP4	9SCOR	phosphopyruvate hydratase OS=Centruroides hentzi OX=88313 PE=3 SV=1	22423	4735.2	59141	48550	3233.2	7854.7	7415.8	7684.5
56	tr|A0A2I9LP41|A0A2I9LP41	9SCOR	Heat shock 70 kDa protein OS=Centruroides hentzi OX=88313 PE=3 SV=1	20557	23529	18330	19063	9887.2	4110.3	10729	14424
57	tr|A0A1W7RAT0|A0A1W7RAT0	9SCOR	Multifunctional fusion protein OS=Hadrurus spadix OX=141984 PE=3 SV=1	111430	55073	123340	94004	2201.9	9015.5	12630	53394
58	tr|Q8B3M2|Q8B3M2	9VIRU	Genome polyprotein OS=Deformed wing virus OX=198112 PE=1 SV=2	6686.9	1742.2	536.37	12799	1322.8	28593	18343	16950
59	tr|A0A2A3EBK6|A0A2A3EBK6	APICC	LIM domain-binding protein OS=Apis cerana cerana OX=94128 GN=APICC	69515	47481	80561	66400	39171	7803.3	35389	28170
60	tr|A0A2A3EJU2|A0A2A3EJU2	APICC	Retinal dehydrogenase OS=Apis cerana cerana OX=94128 GN=APICC	3954.6	6577	4204.7	8228.8	11552	34604	29174	13844
61	tr|A0A2A3EBQ8|A0A2A3EBQ8	APICC	oxoglutarate dehydrogenase (succinyl-transferring) OS=Apis cerana cerana OX=94128 GN=APICC	10978	2044.1	14646	16422	3593.2	7919.4	8569.4	4663.6
62	tr|A0A2A3E889|A0A2A3E889	APICC	Hexamerin OS=Apis cerana cerana OX=94128 GN=APICC	2632	1663	1820.2	2053	3015.6	3595.1	9018.5	4101.1
63	tr|L7ZBB3|L7ZBB3	APICE	alpha-glucosidase OS=Apis cerana indica OX=94129 PE=2 SV=1	15528	31332	3972.4	9898.1	249810	227960	219190	213750
64	tr|V9IG73|V9IG73	APICE	Actin, indirect flight muscle OS=Apis cerana OX=7461 GN=ACCB02987 PE=2 SV=1	3229300	1138000	2769600	6132900	150320	171320	591870	400130
65	tr|V9IEZ2|V9IEZ2	APICE	Heat shock protein OS=Apis cerana OX=7461 GN=ACCB03694 PE=2 SV=1	121440	100040	77790	73094	54541	54948	53325	99339
66	tr|V9IFD6|V9IFD6	APICE	ATP synthase subunit alpha OS=Apis cerana OX=7461 GN=ACCB04724 PE=2 SV=1	180120	54850	207330	214490	40026	46881	76833	97702
67	tr|V9IF40|V9IF40	APICE	Fructose-bisphosphate aldolase OS=Apis cerana OX=7461 GN=ACCB01997.1 PE=2 SV=1	342640	242050	445370	321930	27964	24871	16210	35486
68	tr|V9IHT5|V9IHT5	APICE	Aconitate hydratase, mitochondrial OS=Apis cerana OX=7461 GN=ACCB09718 PE=2 SV=1	376230	97501	746450	687720	262890	175910	163530	158400
69	tr|V9II55|V9II55	APICE	Heat shock protein OS=Apis cerana OX=7461 GN=ACCB10163 PE=2 SV=1	103430	44561	74324	81237	27557	16568	57763	55301
70	tr|V9II66|V9II66	APICE	Cofilin_actin-depolymerizing factor OS=Apis cerana OX=7461 GN=ACCB08393 PE=2 SV=1	164720	148810	152790	137570	54951	69614	83446	90120
71	tr|V9IF19|V9IF19	APICE	Elongation factor 2 OS=Apis cerana OX=7461 GN=ACCB01965.1 PE=2 SV=1	60069	41892	35547	39739	30376	20523	50165	31360
72	tr|V9I6X1|V9I6X1	APICE	Ubiquitin OS=Apis cerana OX=7461 GN=ACCB00063.1 PE=2 SV=1	239860	349160	203360	315470	257300	147700	50616	148080
73	tr|V9IK10|V9IK10	APICE	Stress-70 protein OS=Apis cerana OX=7461 GN=ACCB12548 PE=2 SV=1	188690	55904	158380	134870	43915	105160	74639	120820
74	tr|V9IK78|V9IK78	APICE	Tubulin beta chain OS=Apis cerana OX=7461 GN=ACCB10461 PE=2 SV=1	44238	32211	36754	70562	34390	38175	49491	32338
75	tr|V9IET2|V9IET2	APICE	Peroxiredoxin-6 OS=Apis cerana OX=7461 GN=ACCB01659.1 PE=2 SV=1	10271	10935	8752.3	9798.6	50506	24122	12495	36658
76	tr|V9IL23|V9IL23	APICE	peptidylprolyl isomerase OS=Apis cerana OX=7461 GN=ACCB10792 PE=2 SV=1	170460	188850	153600	241150	85436	118970	172650	95764
77	tr|V9IJY9|V9IJY9	APICE	Stress-induced-phosphoprotein 1 OS=Apis cerana OX=7461 GN=ACCB10665 PE=2 SV=1	67657	33175	51962	40935	10659	7718	12004	21239
78	tr|V9IHC2|V9IHC2	APICE	Calreticulin OS=Apis cerana OX=7461 GN=ACCB09043 PE=2 SV=1	7987.4	5470.5	4179.8	7961.7	3369.3	2689.8	3137.4	10429
79	tr|V9ID72|V9ID72	APICE	Isocitrate dehydrogenase [NAD] subunit, mitochondrial OS=Apis cerana OX=7461 GN=ACCB01186.2 PE=2 SV=1	40292	8644.5	59941	47941	6698.6	26142	27041	50773
80	tr|V9IE59|V9IE59	APICE	Tubulin alpha chain OS=Apis cerana OX=7461 GN=ACCB02368 PE=2 SV=1	10625	6002.2	5969.4	17919	7575.1	4791.2	9897	14728
81	tr|V9IF54|V9IF54	APICE	Myosin light chain alkali OS=Apis cerana OX=7461 GN=ACCB02010 PE=2 SV=1	320780	119640	586500	970170	12780	13078	25044	15031
82	tr|V9IA83|V9IA83	APICE	Alpha,alpha-trehalose-phosphate synthase [UDP-forming] A OS=Apis cerana OX=7461 GN=ACCB00544.1 PE=2 SV=1	18450	2170.1	25947	39698	10423	8786.9	6128.6	2227.4
83	tr|V9ID91|V9ID91	APICE	RNA helicase OS=Apis cerana OX=7461 GN=ACCB01212.1 PE=2 SV=1	3201.6	3596.6	4018.2	3083.8	857.62	4673	7301.4	4910.3
84	tr|V9ID93|V9ID93	APICE	Annexin OS=Apis cerana OX=7461 GN=ACCB01033.2 PE=2 SV=1	4280.9	5909.8	3320.8	4110.3	4913	5342.6	11003	13321
85	tr|V9I8N5|V9I8N5	APICE	Calpain-3 OS=Apis cerana OX=7461 GN=ACCB00047.5 PE=2 SV=1	3970.9	3501.4	2143.6	6134.6	10551	7660.4	3529.5	14779
86	tr|V9IKB3|V9IKB3	APICE	Ribosomal protein L15 OS=Apis cerana OX=7461 GN=ACCB10605 PE=2 SV=1	482.93	1926.3	957.48	3075.8	0	1754.1	0	2943.8
87	tr|V9ILS0|V9ILS0	APICE	Amphiphysin OS=Apis cerana OX=7461 GN=ACCB11611 PE=2 SV=1	21629	13444	15120	17963	4112.7	2902.5	7437.8	1244.6
88	tr|V9II07|V9II07	APICE	Elongation factor 1-gamma OS=Apis cerana OX=7461 GN=ACCB09979 PE=2 SV=1	21171	25739	7450.5	7784.2	16924	14620	759.32	18239
89	tr|V9IKQ3|V9IKQ3	APICE	alanine transaminase OS=Apis cerana OX=7461 GN=ACCB10441 PE=2 SV=1	36193	23595	30048	28746	11921	5429.5	4890.4	8334.1
90	tr|V9IIF6|V9IIF6	APICE	Prohibitin OS=Apis cerana OX=7461 GN=ACCB07116 PE=2 SV=1	519.32	6595.7	7638	11403	65972	62689	3874.5	43200
91	tr|V9IBB9|V9IBB9	APICE	Spermine synthase OS=Apis cerana OX=7461 GN=ACCB00956.1 PE=2 SV=1	4559	6640	7476	5201.4	1824.4	5540.3	2438.6	7168.3
92	tr|V9I7W9|V9I7W9	APICE	Calmodulin OS=Apis cerana OX=7461 GN=ACCB00053.1 PE=2 SV=1	3622.2	1972.7	1937.6	4611.7	3731	67011	86747	75879
93	tr|V9IH34|V9IH34	APICE	10 kDa heat shock protein, mitochondrial OS=Apis cerana OX=7461 GN=ACCB08512 PE=2 SV=1	22476	8219.4	23165	36392	11531	4489.9	1946.9	15568
94	tr|V9IJF3|V9IJF3	APICE	Glutathione S-transferase OS=Apis cerana OX=7461 GN=ACCB11368 PE=2 SV=1	164350	127490	201310	176220	14109	18081	16456	41568
95	tr|Q7YXM6|Q7YXM6	APILI	Superoxide dismutase [Cu-Zn] OS=Apis mellifera ligustica OX=7469 GN=Sod1 PE=2 SV=1	562660	697950	535320	663170	685920	725720	732220	664190
96	tr|Q7YXM5|Q7YXM5	APILI	Superoxide dismutase (Fragment) OS=Apis mellifera ligustica OX=7469 GN=Sod2 PE=2 SV=1	14211	11950	10624	13993	11964	73647	64002	5560.3
97	tr|A0A7M7KXM0|A0A7M7KXM0	APIME	twitchin isoform X2 OS=Apis mellifera OX=7460 GN=LOC409821 PE=3 SV=1	55165	56937	22147	36307	65283	70427	110420	34716
98	tr|A0A7M7GLV1|A0A7M7GLV1	APIME	tropomyosin-1 OS=Apis mellifera OX=7460 GN=408414 PE=3 SV=1	427570	176210	404340	954360	120290	118850	371180	238420
99	tr|A0A088AHC8|A0A088AHC8	APIME	Glyceraldehyde-3-phosphate dehydrogenase OS=Apis mellifera OX=7460 GN=410122 PE=2 SV=1	25114	21411	33451	17966	97067	93761	99014	66812
100	tr|A0A7M7GX00|A0A7M7GX00	APIME	troponin I isoform X18 OS=Apis mellifera OX=7460 GN=410815 PE=4 SV=1	470290	663070	312510	536670	53198	838210	91512	47753
101	tr|A4ZXC4|A4ZXC4	APIME	Triosephosphate isomerase OS=Apis mellifera OX=7460 GN=Tpi PE=2 SV=1	7518.5	12315	10080	12248	33621	30296	60787	24627
102	tr|A0A7M7R758|A0A7M7R758	APIME	Dihydrolipoyl dehydrogenase OS=Apis mellifera OX=7460 GN=551039 PE=3 SV=1	43995	30475	26949	43551	100830	57029	74947	159040
103	tr|Q25BT7|Q25BT7	APIME	alpha-glucosidase OS=Apis mellifera OX=7460 GN=hbg2 PE=4 SV=1	19147	8696.1	15445	18563	78578	35691	66455	93427
104	tr|A0A7M7GV60|A0A7M7GV60	APIME	troponin C type I isoform X3 OS=Apis mellifera OX=7460 GN=411659 PE=4 SV=1	68265	138490	53242	90676	26761	44084	37166	34686
105	tr|A0A7M7L2X0|A0A7M7L2X0	APIME	filamin-like isoform X2 OS=Apis mellifera OX=7460 GN=LOC409697 PE=3 SV=1	25377	29692	28934	23267	39567	48121	38614	27690
106	tr|A0A7M7G8Z8|A0A7M7G8Z8	APIME	peroxiredoxin 1 OS=Apis mellifera OX=7460 GN=LOC409954 PE=3 SV=1	264950	253240	118660	166270	142740	101430	141920	222590
107	tr|A0A7M7LSZ9|A0A7M7LSZ9	APIME	myosin heavy chain, muscle isoform X3 OS=Apis mellifera OX=7460 GN=LOC409843 PE=3 SV=1	48767	28430	71516	233590	22019	15965	45648	36906
108	tr|A0A7M7H421|A0A7M7H421	APIME	Alpha-galactosidase OS=Apis mellifera OX=7460 GN=LOC725899 PE=3 SV=1	23432	35543	20485	11226	54678	54276	55613	67657
109	tr|A0A7M7ML48|A0A7M7ML48	APIME	titin isoform X18 OS=Apis mellifera OX=7460 GN=LOC551259 PE=4 SV=1	98700	113760	61078	77875	37305	51384	84082	70113
110	tr|Q25BT8|Q25BT8	APIME	alpha-glucosidase OS=Apis mellifera OX=7460 GN=hbg1 PE=4 SV=1	10834	6830.3	9014.3	7302.7	19173	8715.8	8285.5	7373
111	tr|A0A7M7GX24|A0A7M7GX24	APIME	Transgelin OS=Apis mellifera OX=7460 GN=LOC408972 PE=3 SV=1	131670	48601	177410	147250	8088.3	1389	25762	4310.7
112	tr|A0A7M7SQ18|A0A7M7SQ18	APIME	apolipophorins OS=Apis mellifera OX=7460 GN=LOC408961 PE=4 SV=1	1483.2	2257.5	2653.1	2955.1	9383.4	2481.8	3983.5	2014
113	tr|A0A7M7MXY7|A0A7M7MXY7	APIME	1,4-alpha-glucan branching enzyme OS=Apis mellifera OX=7460 GN=LOC727168 PE=3 SV=1	8222.2	8232.8	15456	15681	4914.2	7539.2	26435	12613
114	tr|A0A7M6UVC2|A0A7M6UVC2	APIME	heat shock protein Hsp70Ab-like OS=Apis mellifera OX=7460 GN=410620 PE=3 SV=1	22611	29394	18510	27559	6437.6	26947	14092	19211
115	tr|A0A7M7M151|A0A7M7M151	APIME	Glycogen debranching enzyme OS=Apis mellifera OX=7460 GN=LOC411488 PE=3 SV=1	170150	79211	88378	75463	939.03	3922.7	2341.8	3090.2
116	tr|A0A7M7TEZ5|A0A7M7TEZ5	APIME	uncharacterized protein LOC409805 isoform X2 OS=Apis mellifera OX=7460 GN=LOC409805 PE=4 SV=1	11621	787.33	17079	49097	4504.2	3622.9	7190.1	5266.5
117	tr|A0A7M7R616|A0A7M7R616	APIME	phosphoenolpyruvate carboxykinase (GTP) OS=Apis mellifera OX=7460 GN=LOC412843 PE=3 SV=1	19492	8977.4	145580	111740	7630.9	10060	9852.6	7216.6
118	tr|A0A7M7IJ14|A0A7M7IJ14	APIME	transmembrane protease serine 11B-like protein OS=Apis mellifera OX=7460 GN=LOC726352 PE=4 SV=1	13773	2492	10434	4450	41912	5961	18739	12314
119	tr|A0A7M7SRL2|A0A7M7SRL2	APIME	talin-1 isoform X1 OS=Apis mellifera OX=7460 GN=LOC551272 PE=4 SV=1	9189.9	6955.5	6918.4	6093.2	6623.1	1845.3	4546.6	3365.8
120	tr|A0A7M7RB96|A0A7M7RB96	APIME	aldose reductase OS=Apis mellifera OX=7460 GN=551968 PE=4 SV=1	258760	220440	293900	165280	33541	55575	26971	113900
121	tr|A0A7M7G1K4|A0A7M7G1K4	APIME	serine protease 53 OS=Apis mellifera OX=7460 GN=LOC724308 PE=4 SV=1	10352	4639.8	1441.3	10637	1703.3	15585	26486	1205.9
122	tr|A0A7D5HR60|A0A7D5HR60	APIME	Malate dehydrogenase OS=Apis mellifera OX=7460 PE=2 SV=1	5509.2	1656.8	4702.6	2274.4	3917.1	2358.2	4633.6	2143.2
123	tr|A0A7M7R8J0|A0A7M7R8J0	APIME	Dihydrolipoamide acetyltransferase component of pyruvate dehydrogenase complex OS=Apis mellifera OX=7460 GN=551631 PE=3 SV=1	12700	18367	4171.4	2747.7	29288	62535	110310	100380
124	tr|A0A7M7LQ78|A0A7M7LQ78	APIME	Carboxypeptidase Q OS=Apis mellifera OX=7460 GN=410149 PE=4 SV=1	1085.5	4777.5	17011	36464	5107.7	4354.3	7801.3	4137.2
125	tr|A0A7M7L4A7|A0A7M7L4A7	APIME	heterogeneous nuclear ribonucleoprotein Q isoform X7 OS=Apis mellifera OX=7460 GN=LOC408775 PE=4 SV=1	10852	7585.3	7462.9	2793.4	3262.9	3549.6	11035	7800.7
126	tr|Q6VQ13|Q6VQ13	APIME	ADP_ATP translocase OS=Apis mellifera OX=7460 GN=406075 PE=2 SV=1	2444.3	1136.8	1618.1	1894.3	3528.9	6073.7	7041.5	1367.4
127	tr|A0A7M7GQ45|A0A7M7GQ45	APIME	Alpha-1,4 glucan phosphorylase OS=Apis mellifera OX=7460 GN=409267 PE=3 SV=1	65623	66179	43354	36577	3710.6	7790	14865	8647.7
128	tr|A0A7M7L1X5|A0A7M7L1X5	APIME	Proteasome subunit alpha type OS=Apis mellifera OX=7460 GN=LOC100578243 PE=3 SV=1	6130.7	3676.3	7258.4	1327.3	5857.3	1804.4	7721.1	8744.4
129	tr|A0A7M7GWN5|A0A7M7GWN5	APIME	arylsulfatase B OS=Apis mellifera OX=7460 GN=552073 PE=3 SV=1	2257.9	2575.6	1482.4	2636.4	9748.5	49573	59927	3057.9
130	tr|A0A7M7TFV4|A0A7M7TFV4	APIME	zinc carboxypeptidase OS=Apis mellifera OX=7460 GN=551524 PE=3 SV=1	1844.6	3244.9	3032.6	5136	2647.1	25286	8538.3	23206
131	tr|A0A7M7MP16|A0A7M7MP16	APIME	transmembrane protease serine 9-like OS=Apis mellifera OX=7460 GN=LOC113219006 PE=4 SV=1	6481.7	5291.2	3595.4	5015.9	15201	6554.5	2383.5	16345
132	tr|A0A7M7GE53|A0A7M7GE53	APIME	uncharacterized protein LOC100577527 OS=Apis mellifera OX=7460 GN=100577527 PE=4 SV=1	1134	1280.3	668.33	2322.5	1297.6	2092.1	2263.2	25693
133	tr|A0A7M7MMK3|A0A7M7MMK3	APIME	Superoxide dismutase [Cu-Zn] OS=Apis mellifera OX=7460 GN=LOC113218958 PE=3 SV=1	13909	15284	17515	22477	82018	91430	87680	75986
134	tr|A0A7M7G911|A0A7M7G911	APIME	uncharacterized protein LOC727243 OS=Apis mellifera OX=7460 GN=LOC727243 PE=4 SV=1	3433.9	3412.4	5175.8	3702.8	4366.7	4415.7	2544.1	3631.8
135	tr|A0A7M7TFB5|A0A7M7TFB5	APIME	muscle LIM protein Mlp84B isoform X2 OS=Apis mellifera OX=7460 GN=411285 PE=4 SV=1	35042	7750.6	53053	56146	1813.7	2007.1	0	572.29
136	tr|A0A7M7RBB8|A0A7M7RBB8	APIME	Eukaryotic translation initiation factor 2A OS=Apis mellifera OX=7460 GN=552764 PE=3 SV=1	20123	14015	21021	19173	1884.3	1962.4	4223	2162
137	tr|A0A7M7G1N6|A0A7M7G1N6	APIME	NPC intracellular cholesterol transporter 2 OS=Apis mellifera OX=7460 GN=724386 PE=3 SV=1	3413.4	2004	5286.8	6287.9	6414.7	10142	20816	7616.8
138	tr|R9QKY2|R9QKY2	BOMHU	Glucose-6-phosphate isomerase (Fragment) OS=Bombus humilis OX=65597 GN=Pgi PE=3 SV=1	40119	15743	101430	89666	11692	7126.7	12664	7273.9
139	tr|A0A6P3TVX4|A0A6P3TVX4	BOMTE	myosin heavy chain, muscle isoform X28 OS=Bombus terrestris OX=30195 GN=LOC100647343 PE=3 SV=1	66574	44108	77207	201310	19135	11143	37110	13687
140	tr|A0A6P5HR09|A0A6P5HR09	BOMTE	LOW QUALITY PROTEIN: titin OS=Bombus terrestris OX=30195 GN=LOC100643650 PE=3 SV=1	126960	20765	48402	63257	21474	33394	27525	26928
141	tr|A0A6P3U6D2|A0A6P3U6D2	BOMTE	alpha-actinin, sarcomeric isoform X1 OS=Bombus terrestris OX=30195 GN=LOC100652204 PE=3 SV=1	726520	578150	377570	461020	92160	119130	93573	76428
142	tr|A0A6P3TYQ7|A0A6P3TYQ7	BOMTE	paramyosin, long form OS=Bombus terrestris OX=30195 GN=LOC100644720 PE=4 SV=1	241600	187190	348950	608790	94824	72503	525050	104810
143	tr|A0A6P5I4V8|A0A6P5I4V8	BOMTE	troponin T, skeletal muscle isoform X3 OS=Bombus terrestris OX=30195 GN=LOC100648673 PE=3 SV=1	479700	236980	298490	564700	62075	53783	73036	61384
144	tr|A0A6P3U581|A0A6P3U581	BOMTE	tropomyosin isoform X9 OS=Bombus terrestris OX=30195 GN=LOC100650354 PE=3 SV=1	206640	106610	270490	559950	91160	138250	294570	211850
145	tr|A0A6P5I2P0|A0A6P5I2P0	BOMTE	Calcium-transporting ATPase OS=Bombus terrestris OX=30195 GN=LOC100642652 PE=3 SV=1	2796.3	2159.5	6217	7680.6	4408.6	24200	22816	24163
146	tr|A0A6P3DG53|A0A6P3DG53	BOMTE	uncharacterized protein LOC100650291 isoform X1 OS=Bombus terrestris OX=30195 GN=LOC100650291 PE=4 SV=1	91878	52953	79179	169640	92088	68938	40713	25036
147	tr|A0A6P5IEK0|A0A6P5IEK0	BOMTE	muscle LIM protein Mlp84B isoform X1 OS=Bombus terrestris OX=30195 GN=LOC100646273 PE=4 SV=1	162570	30207	252130	314830	102820	45617	44995	57187
148	tr|A0A6P3DDE1|A0A6P3DDE1	BOMTE	Glyceraldehyde-3-phosphate dehydrogenase OS=Bombus terrestris OX=30195 GN=LOC100648830 PE=3 SV=1	58736	23259	58270	46510	1582.3	4002.5	5490.7	6019.9
149	tr|A0A6P3D7G6|A0A6P3D7G6	BOMTE	Succinate--CoA ligase [ADP_GDP-forming] subunit alpha, mitochondrial OS=Bombus terrestris OX=30195 GN=LOC100652037 PE=3 SV=1	106920	33226	139250	136460	86200	36544	39810	108640
150	tr|A0A6P3DGF4|A0A6P3DGF4	BOMTE	Phosphoglycerate mutase OS=Bombus terrestris OX=30195 GN=LOC100651143 PE=3 SV=1	33261	14316	98996	76055	11112	50874	58816	9452.4
151	tr|A0A6P3D7P7|A0A6P3D7P7	BOMTE	transketolase-like protein 2 isoform X2 OS=Bombus terrestris OX=30195 GN=LOC100649799 PE=4 SV=1	172750	615270	300730	242380	1039600	193230	610220	710480
152	tr|A0A6P3DB16|A0A6P3DB16	BOMTE	actin-interacting protein 1 isoform X1 OS=Bombus terrestris OX=30195 GN=LOC100645373 PE=4 SV=1	108700	105910	158910	62223	18757	17574	29870	21054
153	tr|A0A6P3DLV5|A0A6P3DLV5	BOMTE	heat shock protein beta-1 isoform X2 OS=Bombus terrestris OX=30195 GN=LOC100644627 PE=3 SV=1	269590	180550	193990	204370	27889	14227	28270	16396
154	tr|A0A6P3D7Q5|A0A6P3D7Q5	BOMTE	cytochrome c OS=Bombus terrestris OX=30195 GN=LOC100648549 PE=3 SV=1	46587	57440	49047	80034	48477	18760	14499	46961
155	tr|A0A6P3UDI8|A0A6P3UDI8	BOMTE	UTP--glucose-1-phosphate uridylyltransferase OS=Bombus terrestris OX=30195 GN=LOC100642664 PE=3 SV=1	13240	8736.6	16223	12801	2909.5	2453.1	7283.4	9677.4
156	tr|A0A6P5I5Q8|A0A6P5I5Q8	BOMTE	Alpha-1,4 glucan phosphorylase OS=Bombus terrestris OX=30195 GN=LOC100642931 PE=3 SV=1	139680	136560	84143	101250	13286	6975.8	12871	10320
157	tr|A0A6P3DG49|A0A6P3DG49	BOMTE	Calponin OS=Bombus terrestris OX=30195 GN=LOC100646158 PE=3 SV=1	84495	62647	100060	110370	196600	21638	144020	20083
158	tr|A0A6P3DIG8|A0A6P3DIG8	BOMTE	glutamate dehydrogenase [NAD(P)(+)] OS=Bombus terrestris OX=30195 GN=LOC100650055 PE=3 SV=1	17269	6550.8	11427	17827	2538.3	4109.8	13448	5831.3
159	tr|A0A6P3UBI7|A0A6P3UBI7	BOMTE	Transferrin OS=Bombus terrestris OX=30195 GN=LOC100650460 PE=3 SV=1	194780	132490	159640	150280	112300	111120	119420	224180
160	tr|A0A6P3UBY6|A0A6P3UBY6	BOMTE	Transgelin OS=Bombus terrestris OX=30195 GN=LOC105666555 PE=3 SV=1	100500	71249	119870	118150	11987	18700	26930	28987
161	tr|A0A6P3DJM2|A0A6P3DJM2	BOMTE	Malic enzyme OS=Bombus terrestris OX=30195 GN=LOC100642264 PE=3 SV=1	6671.6	7549.7	11900	11077	1334.5	2549.9	6619.4	2839.2
162	tr|A0A6P3UHF6|A0A6P3UHF6	BOMTE	chitinase-like protein Idgf4 isoform X2 OS=Bombus terrestris OX=30195 GN=LOC100650230 PE=3 SV=1	19853	9285	18874	20068	14561	11060	24154	6540.1
163	tr|A0A6P3D672|A0A6P3D672	BOMTE	phosphoenolpyruvate carboxykinase (GTP) OS=Bombus terrestris OX=30195 GN=LOC100631088 PE=3 SV=1	124190	59228	646290	468000	11605	14971	6217.2	8453.3
164	tr|A0A6P3DPJ9|A0A6P3DPJ9	BOMTE	alpha-glucosidase OS=Bombus terrestris OX=30195 GN=LOC100649281 PE=4 SV=1	28050	2983.5	13743	1694.2	30302	39500	60505	23694
165	tr|A0A6P5I2Y9|A0A6P5I2Y9	BOMTE	twitchin isoform X2 OS=Bombus terrestris OX=30195 GN=LOC100644118 PE=3 SV=1	99282	107970	42773	67617	1031.9	1330.2	18363	4264
166	tr|A0A6P3TVX5|A0A6P3TVX5	BOMTE	1,4-alpha-glucan branching enzyme OS=Bombus terrestris OX=30195 GN=LOC100650166 PE=3 SV=1	40962	23003	95229	115230	5704.6	4328.3	11942	7068.2
167	tr|A0A6P3DM36|A0A6P3DM36	BOMTE	Multifunctional fusion protein OS=Bombus terrestris OX=30195 GN=LOC100642390 PE=3 SV=1	17444	9008.5	22095	14395	5556.5	9269.3	4680.7	11875
168	tr|A0A6P3U2G4|A0A6P3U2G4	BOMTE	uncharacterized protein LOC100647860 isoform X1 OS=Bombus terrestris OX=30195 GN=LOC100647860 PE=4 SV=1	129010	20717	166240	470730	22178	5281.5	28477	3966.7
169	tr|A0A6P3UK05|A0A6P3UK05	BOMTE	Annexin OS=Bombus terrestris OX=30195 GN=LOC100650720 PE=3 SV=1	2281.5	1801.5	3488.4	789.76	2479.3	2870	30122	12796
170	tr|A0A6P3DHD5|A0A6P3DHD5	BOMTE	Pyruvate dehydrogenase E1 component subunit alpha OS=Bombus terrestris OX=30195 GN=LOC100643255 PE=4 SV=1	3442.9	2057.7	6073.7	4338.7	1239.8	4143.3	9512.7	4840.5
171	tr|A0A6P5I3K1|A0A6P5I3K1	BOMTE	laminin subunit beta-1 isoform X3 OS=Bombus terrestris OX=30195 GN=LOC100642555 PE=4 SV=1	2350.9	2486.5	2621.1	3276.4	2052	4885	3724.7	2524.7
172	tr|A0A6P3DFV2|A0A6P3DFV2	BOMTE	carbonyl reductase (NADPH) OS=Bombus terrestris OX=30195 GN=LOC100643942 PE=4 SV=1	4385.9	7025.5	5685.3	4857	31195	39293	41570	1608.4
173	tr|A0A6P3U365|A0A6P3U365	BOMTE	uncharacterized protein LOC100642610 OS=Bombus terrestris OX=30195 GN=LOC100642610 PE=4 SV=1	3844.8	3249.7	7837.9	17543	85223	9706.1	105760	82465
174	tr|A0A6P3UCY2|A0A6P3UCY2	BOMTE	Aspartate aminotransferase OS=Bombus terrestris OX=30195 GN=LOC100649476 PE=3 SV=1	9237.9	6079.1	13763	16335	19044	6599.2	0	13294
175	tr|A0A6P3UJ18|A0A6P3UJ18	BOMTE	heat shock 70 kDa protein 4 isoform X2 OS=Bombus terrestris OX=30195 GN=LOC100646893 PE=3 SV=1	39862	28668	29274	35615	12838	14582	19448	28863
176	tr|A0A6P3UJ80|A0A6P3UJ80	BOMTE	Lactoylglutathione lyase OS=Bombus terrestris OX=30195 GN=LOC105667111 PE=3 SV=1	45174	41996	40704	34643	20710	10622	13621	32277
177	tr|A0A6P3U6Y5|A0A6P3U6Y5	BOMTE	lamin-C isoform X2 OS=Bombus terrestris OX=30195 GN=LOC100648485 PE=3 SV=1	19601	20695	18034	13910	2154	4772.6	5226.4	9556.5
178	tr|A0A6P5I3R1|A0A6P5I3R1	BOMTE	alpha-L-fucosidase OS=Bombus terrestris OX=30195 GN=LOC100644255 PE=3 SV=1	3644.8	7948.2	7032.3	6479.3	10195	14117	11383	6519.7
179	tr|A0A6P3U6Z7|A0A6P3U6Z7	BOMTE	Phosphoglycerate kinase OS=Bombus terrestris OX=30195 GN=LOC100645172 PE=3 SV=1	46645	23091	63373	62257	28478	6472	18945	31297
180	tr|A0A6P5HFS8|A0A6P5HFS8	BOMTE	Phosphotransferase OS=Bombus terrestris OX=30195 GN=LOC100646701 PE=3 SV=1	54275	49374	43685	39186	1315.8	6103.6	2344.7	2606.7
181	tr|A0A6P3DGE5|A0A6P3DGE5	BOMTE	serine protease 53-like OS=Bombus terrestris OX=30195 GN=LOC100650014 PE=4 SV=1	2987.6	9251.2	1636.1	1174.3	11802	6757.2	3817.5	17804
182	tr|A0A6P3DG00|A0A6P3DG00	BOMTE	LOW QUALITY PROTEIN: protein dj-1beta OS=Bombus terrestris OX=30195 GN=LOC100652254 PE=4 SV=1	52657	26935	37761	44121	10649	6965.5	9719	5434.6
183	tr|A0A0A5SYN4|A0A0A5SYN4	CITFR	Glyceraldehyde-3-phosphate dehydrogenase OS=Citrobacter freundii OX=546 GN=gapA PE=3 SV=1	4085	3721	7411.8	9808.8	36791	27137	27384	52565
184	tr|J3SBS4|J3SBS4	CROAD	alcohol dehydrogenase (NADP(+)) OS=Crotalus adamanteus OX=8729 PE=2 SV=1	132650	126240	146190	130390	8147.3	5245	971.74	18357
185	tr|A0A6L3RX62|A0A6L3RX62	CROSK	Cysteine/glutathione ABC transporter ATP-binding protein/permease CydC OS=Cronobacter sakazakii OX=28141 GN=cydC PE=4 SV=1	6239.7	2846.1	6150.4	15156	29811	14202	4311.6	5295.6
186	tr|A0A154PP88|A0A154PP88	DUFNO	Alpha-1,4 glucan phosphorylase OS=Dufourea novaeangliae OX=178035 GN=WN55	610580	509690	404990	434080	39579	25864	69408	60793
187	tr|A0A154PIM3|A0A154PIM3	DUFNO	Twitchin OS=Dufourea novaeangliae OX=178035 GN=WN55	233810	146970	187420	207730	111790	81247	62198	97167
188	tr|A0A154PKU8|A0A154PKU8	DUFNO	Malic enzyme (Fragment) OS=Dufourea novaeangliae OX=178035 GN=WN55	85059	70909	98231	86542	25750	12374	10887	26126
189	tr|A0A154P1T4|A0A154P1T4	DUFNO	oxoglutarate dehydrogenase (succinyl-transferring) OS=Dufourea novaeangliae OX=178035 GN=WN55	117580	5369.3	114420	128040	11292	15941	11806	30276
190	tr|A0A154PE24|A0A154PE24	DUFNO	phosphoenolpyruvate carboxykinase (GTP) OS=Dufourea novaeangliae OX=178035 GN=WN55	94182	45497	502700	359420	44948	30783	41467	72345
191	tr|A0A154PEK6|A0A154PEK6	DUFNO	Citrate synthase OS=Dufourea novaeangliae OX=178035 GN=WN55	154670	133880	219730	188940	20011	26332	44569	43172
192	tr|A0A154PPS0|A0A154PPS0	DUFNO	phosphopyruvate hydratase OS=Dufourea novaeangliae OX=178035 GN=WN55	76355	22214	137160	113590	98613	29966	60094	23831
193	tr|A0A154P3S2|A0A154P3S2	DUFNO	Muscle M-line assembly protein unc-89 OS=Dufourea novaeangliae OX=178035 GN=WN55	43881	30825	25884	29338	21090	31244	15969	18682
194	tr|A0A154PN63|A0A154PN63	DUFNO	Malate dehydrogenase OS=Dufourea novaeangliae OX=178035 GN=WN55	274000	143950	296250	247400	54252	61409	56844	147500
195	tr|A0A154PQ04|A0A154PQ04	DUFNO	Fructose-bisphosphate aldolase OS=Dufourea novaeangliae OX=178035 GN=WN55	4670.3	6293.2	11710	10049	1308.5	5414.7	5835.6	2764
196	tr|A0A154P1Q6|A0A154P1Q6	DUFNO	Elongation factor 1-alpha OS=Dufourea novaeangliae OX=178035 GN=WN55	41492	27745	69823	61694	5471.3	10727	6293.9	36749
197	tr|A0A154P208|A0A154P208	DUFNO	Transaldolase (Fragment) OS=Dufourea novaeangliae OX=178035 GN=WN55	56529	64679	51525	57284	10546	30111	7167.6	25196
198	tr|A0A154PL96|A0A154PL96	DUFNO	Pyruvate dehydrogenase E1 component subunit beta OS=Dufourea novaeangliae OX=178035 GN=WN55	8928.3	1566.1	12344	15741	2233.1	2160.6	5407.2	1106.9
199	tr|A0A154PNQ0|A0A154PNQ0	DUFNO	Sortilin-related receptor OS=Dufourea novaeangliae OX=178035 GN=WN55	2462.8	1208.7	1138.8	3102.9	11021	116040	15097	61232
200	tr|A0A154PSQ8|A0A154PSQ8	DUFNO	Myosin heavy chain, muscle OS=Dufourea novaeangliae OX=178035 GN=WN55	45150	19693	43577	78580	27181	77985	136890	38935
201	tr|A0A154PJN9|A0A154PJN9	DUFNO	Heat shock 70 kDa protein cognate 3 OS=Dufourea novaeangliae OX=178035 GN=WN55	74836	64947	42174	62616	69942	60761	91692	85525
202	tr|A0A154PH97|A0A154PH97	DUFNO	phosphoglucomutase (alpha-D-glucose-1,6-bisphosphate-dependent) OS=Dufourea novaeangliae OX=178035 GN=WN55	197080	118940	288730	258560	73799	50291	50851	33825
203	tr|A0A154PI85|A0A154PI85	DUFNO	Heat shock protein 83 OS=Dufourea novaeangliae OX=178035 GN=WN55	7620.9	7254	5346.3	10420	12958	17476	10071	10220
204	tr|A0A154PS72|A0A154PS72	DUFNO	Profilin OS=Dufourea novaeangliae OX=178035 GN=WN55	16207	3895.2	26869	25624	5890.9	79626	140910	12688
205	tr|A0A154PFC9|A0A154PFC9	DUFNO	Ornithine aminotransferase OS=Dufourea novaeangliae OX=178035 GN=WN55	14274	4145.8	33306	28183	8368.7	8194.4	5104	9169.9
206	tr|A0A154NYA3|A0A154NYA3	DUFNO	Cytochrome c-2 OS=Dufourea novaeangliae OX=178035 GN=WN55	42193	63929	55580	80902	53114	43070	35305	40233
207	tr|A0A154PH44|A0A154PH44	DUFNO	Glycerol-3-phosphate dehydrogenase [NAD(+)] OS=Dufourea novaeangliae OX=178035 GN=WN55	1142.7	1114.4	1170.7	401.45	1128.7	3972.2	4005.5	3320
208	tr|A0A154PHR8|A0A154PHR8	DUFNO	Coronin OS=Dufourea novaeangliae OX=178035 GN=WN55	12153	8999.2	8478.1	8767.5	3305.8	4757.1	21449	17542
209	tr|A0A154PKM2|A0A154PKM2	DUFNO	Phosphotransferase OS=Dufourea novaeangliae OX=178035 GN=WN55	12414	7115	8467.8	8627.3	2640.2	2216.2	5286.4	3203.7
210	tr|A0A154PMQ1|A0A154PMQ1	DUFNO	Aminopeptidase OS=Dufourea novaeangliae OX=178035 GN=WN55	983.79	4608.7	2780.8	2119.4	7339.6	18763	21753	8414.3
211	tr|A0A154PSS0|A0A154PSS0	DUFNO	Pyruvate kinase (Fragment) OS=Dufourea novaeangliae OX=178035 GN=WN55	189030	173710	156820	150980	51766	52472	7956.4	103210
212	tr|A0A154PAE9|A0A154PAE9	DUFNO	Glyceraldehyde-3-phosphate dehydrogenase OS=Dufourea novaeangliae OX=178035 GN=WN55	19574	4018.3	37733	38750	3565.2	16622	18484	14867
213	tr|A0A154PRP5|A0A154PRP5	DUFNO	Glycerol-3-phosphate dehydrogenase OS=Dufourea novaeangliae OX=178035 GN=WN55	12661	20140	47485	46508	19413	14174	33119	21878
214	tr|A0A154PIT4|A0A154PIT4	DUFNO	Rab GDP dissociation inhibitor OS=Dufourea novaeangliae OX=178035 GN=WN55	54704	55796	41191	40764	56616	6529.4	13012	62137
215	tr|Q49P72|Q49P72	ECOLX	Outer membrane protein A OS=Escherichia coli OX=562 GN=ompA PE=3 SV=1	10267	5051	3511.1	8447.1	41909	28903	139750	59057
216	tr|W8TGE9|W8TGE9	ECOLX	Thioredoxin OS=Escherichia coli OX=562 GN=trxA PE=3 SV=1	12746	18210	15030	16754	88421	73553	72909	57616
217	tr|E2QJ06|E2QJ06	ECOLX	Elongation factor Tu OS=Escherichia coli OX=562 GN=tufA	1150.8	1414.7	8489.9	2332.8	2874.3	4348.6	6767.3	2765.2
218	tr|K4WKC0|K4WKC0	ECOLX	Enolase OS=Escherichia coli O111:H11 str. CVM9455 OX=1165939 GN=eno PE=3 SV=1	4894	1990.7	1234.8	2019.6	14003	11813	7260.9	7869.6
219	tr|W8TPS1|W8TPS1	ECOLX	Isocitrate dehydrogenase [NADP] OS=Escherichia coli OX=562 GN=icdA PE=4 SV=1	19130	13844	22122	5399.2	9573.9	5533	18551	5400.6
220	tr|T1FY51|T1FY51	HELRO	Glutamine amidotransferase type-2 domain-containing protein OS=Helobdella robusta OX=6412 GN=20213749 PE=3 SV=1	539.85	1076.6	933.58	595.82	974.45	0	22524	2282.7
221	tr|S6B291|S6B291	HUMAN	IgG H chain OS=Homo sapiens OX=9606 PE=1 SV=1	67560	82217	67334	93582	266760	375520	363430	247360
222	tr|Q8TCD0|Q8TCD0	HUMAN	Ig-like domain-containing protein OS=Homo sapiens OX=9606 PE=1 SV=1	6952.1	4439.5	6441.7	8529.9	26288	14694	20105	13585
223	tr|A0A8C6NUW2|A0A8C6NUW2	NOTFU	Serine threonine-protein kinase receptor OS=Nothobranchius furzeri OX=105023 PE=3 SV=1	3537	4547.2	1673.6	11348	11534	7069.9	12508	17138
224	tr|A7XZV8|A7XZV8	SIGCA	Heat shock protein 70 (Fragment) OS=Siganus canaliculatus OX=75042 GN=hsp70 PE=2 SV=1	45437	30130	20377	28492	10875	63474	39722	41225
225	tr|A4UA14|A4UA14	VESBA	Dipeptidylpeptidase IV OS=Vespa basalis OX=7444 GN=DPP4 PE=2 SV=1	360480	679370	316930	369820	3363400	1569100	1535800	1506200
226	tr|Q5Q049|Q5Q049	VESCR	Chemosensory protein OS=Vespa crabro OX=7445 GN=CSP-1 PE=2 SV=1	112770	96518	113970	147900	32882	29681	49739	23212
227	tr|L0N3X9|L0N3X9	VESMA	Immune responsive protein 30 OS=Vespa mandarinia japonica OX=1053483 GN=IRP30 PE=2 SV=1	58982	16092	19483	11709	50512	15883	72467	43116
228	tr|E7CIJ1|E7CIJ1	VESMA	14-3-3 zeta (Fragment) OS=Vespa mandarinia OX=7446 PE=3 SV=1	18773	17453	18385	10569	27680	5472.3	52005	12212
229	tr|B7SD94|B7SD94	VESMG	Anticoagulant serine protease OS=Vespa magnifica OX=202807 PE=2 SV=1	7592.2	14341	19547	18247	106670	96577	92546	101080
230	sp|C0HLL3|PA1	VESVE	Phospholipase A1 OS=Vespa velutina OX=202808 PE=1 SV=1	2380800	4369600	4364200	5019000	90026000	81734000	90581000	47838000
231	sp|P0DMB9|VA5	VESVE	Venom allergen 5 OS=Vespa velutina OX=202808 PE=1 SV=2	1125600	2288200	1978600	2397800	44832000	54884000	123560000	74715000
232	sp|C0HLL4|HUGA	VESVE	Hyaluronidase A OS=Vespa velutina OX=202808 PE=1 SV=1	1393300	1717800	1985300	2317300	14852000	9087300	8971900	16897000
233	sp|C0HLL5|HUGAB	VESVE	Hyaluronidase B OS=Vespa velutina OX=202808 PE=1 SV=1	116050	177490	145890	144700	610730	504140	380340	590260
234	sp|P0DMB8|PA12B	VESVE	Phospholipase A1 verutoxin-2b (Fragment) OS=Vespa velutina OX=202808 PE=1 SV=1	590200	1504100	951490	1486600	25979000	8934000	6792200	8935900
235	tr|A0A384ZVP9|A0A384ZVP9	VESVE	Chemosensory protein 1 (Fragment) OS=Vespa velutina OX=202808 PE=2 SV=1	830.18	1224.6	431.51	247.32	2600.3	2585.9	1890.9	1958.6
236	tr|G8IIT0|G8IIT0	VESVU	Vitellogenin OS=Vespula vulgaris OX=7454 PE=2 SV=1	1829600	929180	1681500	1904900	95522	80804	85244	95784
237	tr|A9CMG8|A9CMG8	VESXA	Hornet silk protein Vssilk 3 OS=Vespa xanthoptera OX=7448 GN=Vssilk3 PE=2 SV=1	14392	8475	9577.3	19862	26370	30293	41441	16929
238	tr|A9CMG6|A9CMG6	VESXA	Hornet silk protein Vssilk 1 OS=Vespa xanthoptera OX=7448 GN=Vssilk1 PE=2 SV=1	15268	11646	13811	15694	124150	26593	46880	26082
239	tr|A9CMG7|A9CMG7	VESXA	Hornet silk protein Vssilk 2 OS=Vespa xanthoptera OX=7448 GN=Vssilk2 PE=2 SV=1	17323	12018	10613	16702	18011	18472	34446	23832
240	tr|D6RU88|D6RU88	VESXA	Hornet silk protein Vssilk 4 OS=Vespa xanthoptera OX=7448 GN=Vssilk4 PE=2 SV=1	10741	6178.3	11907	17883	51772	39131	47066	11548

## Sheet: FoldChange_VSE-G vs VSE-W
VSE-G	Vespa crabro gyne venom sac extract
VSE-W	Vespa crabro worker venom sac extract
n	Uniprot code	Group	Protein	p-value (t test)	Fold change (VSE-G vs VSE-W)
1	tr|A0A1V9XXZ1|A0A1V9XXZ1	9ACAR	Histone H4 OS=Tropilaelaps mercedesae OX=418985 GN=BIW11_06453 PE=3 SV=1	0.079786	0.477071
2	tr|A0A1V9X4H1|A0A1V9X4H1	9ACAR	vesicle-fusing ATPase OS=Tropilaelaps mercedesae OX=418985 GN=BIW11_12940 PE=4 SV=1	0.203853	0.5863
3	tr|A0A1B1VVK2|A0A1B1VVK2	9COLE	arginine kinase (Fragment) OS=Anchycteis velutina OX=1605641 PE=3 SV=1	0.159223	3.08788
4	tr|A0A0L0AQN9|A0A0L0AQN9	9ENTR	Major outer membrane lipoprotein Lpp OS=Klebsiella sp. RIT-PI-d OX=1681196 GN=lpp PE=3 SV=1	0.047906	0.243508
5	tr|Q17TA6|Q17TA6	9HYME	arginine kinase (Fragment) OS=Bombus festivus OX=309958 GN=ArgK PE=3 SV=1	0.778599	1.17596
6	tr|Q8WRL1|Q8WRL1	9HYME	Elongation factor 1-alpha (Fragment) OS=Agapostemon leunculus OX=178016 PE=3 SV=1	0.167979	1.82978
7	tr|A0A833S1C5|A0A833S1C5	9HYME	Spectrin alpha chain OS=Frieseomelitta varia OX=561572 GN=E2986_06718 PE=3 SV=1	0.822795	1.06159
8	tr|A0A833SA96|A0A833SA96	9HYME	Nucleoside diphosphate kinase OS=Frieseomelitta varia OX=561572 GN=E2986_00655 PE=3 SV=1	0.476786	0.73367
9	tr|A0A833S1K4|A0A833S1K4	9HYME	Malic enzyme OS=Frieseomelitta varia OX=561572 GN=E2986_01523 PE=3 SV=1	0.0168071	2.01365
10	tr|A0A833S7R5|A0A833S7R5	9HYME	Twitchin OS=Frieseomelitta varia OX=561572 GN=E2986_02699 PE=3 SV=1	0.915932	0.933682
11	tr|A0A833W0Z5|A0A833W0Z5	9HYME	H(+)-transporting two-sector ATPase OS=Frieseomelitta varia OX=561572 GN=E2986_00271 PE=3 SV=1	0.0160729	3.56244
12	tr|A0A833S5I5|A0A833S5I5	9HYME	Phosphoglycerate kinase OS=Frieseomelitta varia OX=561572 GN=E2986_03639 PE=3 SV=1	0.164539	2.64408
13	tr|A0A833RN92|A0A833RN92	9HYME	Pyruvate carboxylase OS=Frieseomelitta varia OX=561572 GN=E2986_01877 PE=4 SV=1	0.680777	0.913835
14	tr|A0A833SBT7|A0A833SBT7	9HYME	Succinate--CoA ligase [ADP-forming] subunit beta, mitochondrial OS=Frieseomelitta varia OX=561572 GN=E2986_00010 PE=3 SV=1	0.0447071	1.90182
15	tr|A0A833W9E6|A0A833W9E6	9HYME	Dihydrolipoyl dehydrogenase OS=Frieseomelitta varia OX=561572 GN=E2986_06607 PE=3 SV=1	0.114353	1.63939
16	tr|A0A833W593|A0A833W593	9HYME	Titin OS=Frieseomelitta varia OX=561572 GN=E2986_10890 PE=3 SV=1	0.000292837	7.68826
17	tr|A0A833W9A3|A0A833W9A3	9HYME	Proteasome subunit alpha type OS=Frieseomelitta varia OX=561572 GN=E2986_10413 PE=3 SV=1	1.12466e-05	0.313083
18	tr|A0A833RCD6|A0A833RCD6	9HYME	Aminopeptidase OS=Frieseomelitta varia OX=561572 GN=E2986_04328 PE=3 SV=1	0.0132452	0.325171
19	tr|A0A833RRC8|A0A833RRC8	9HYME	Thioredoxin reductase 1, mitochondrial OS=Frieseomelitta varia OX=561572 GN=E2986_09084 PE=3 SV=1	0.526239	1.14522
20	tr|A0A833W2G7|A0A833W2G7	9HYME	Nidogen OS=Frieseomelitta varia OX=561572 GN=E2986_04129 PE=4 SV=1	0.00713922	2.0814
21	tr|A0A833SC55|A0A833SC55	9HYME	Rab GDP dissociation inhibitor OS=Frieseomelitta varia OX=561572 GN=E2986_05736 PE=3 SV=1	0.168655	0.223937
22	tr|A0A833S8G1|A0A833S8G1	9HYME	Aminopeptidase OS=Frieseomelitta varia OX=561572 GN=E2986_13028 PE=3 SV=1	0.00725789	1.9243
23	tr|A0A833RSF2|A0A833RSF2	9HYME	Succinate dehydrogenase [ubiquinone] flavoprotein subunit, mitochondrial OS=Frieseomelitta varia OX=561572 GN=E2986_06932 PE=3 SV=1	0.18429	0.456752
24	tr|A0A833S6L6|A0A833S6L6	9HYME	arginine kinase OS=Frieseomelitta varia OX=561572 GN=E2986_14001 PE=3 SV=1	0.13354	0.0945373
25	tr|A0A833W2V6|A0A833W2V6	9HYME	Ras-related protein Rab-43 OS=Frieseomelitta varia OX=561572 GN=E2986_10129 PE=3 SV=1	0.0115687	0.136883
26	tr|A0A833WFE3|A0A833WFE3	9HYME	Calcium-transporting ATPase OS=Frieseomelitta varia OX=561572 GN=E2986_05888 PE=3 SV=1	0.0258296	3.69491
27	tr|A0A833RF82|A0A833RF82	9HYME	fumarate hydratase OS=Frieseomelitta varia OX=561572 GN=E2986_04150 PE=3 SV=1	0.0855344	1.67283
28	tr|A0A833SBP4|A0A833SBP4	9HYME	Glycoside hydrolase family 31 N-terminal domain-containing protein OS=Frieseomelitta varia OX=561572 GN=E2986_05199 PE=3 SV=1	0.0567978	0.0907228
29	tr|A0A833VPP9|A0A833VPP9	9HYME	ornithine aminotransferase OS=Frieseomelitta varia OX=561572 GN=E2986_11900 PE=3 SV=1	0.292481	0.241241
30	tr|A0A833W8Q7|A0A833W8Q7	9HYME	6-phosphogluconate dehydrogenase, decarboxylating OS=Frieseomelitta varia OX=561572 GN=E2986_09252 PE=3 SV=1	0.0417042	4.59494
31	tr|A0A833R489|A0A833R489	9HYME	Superoxide dismutase OS=Frieseomelitta varia OX=561572 GN=E2986_07326 PE=3 SV=1	0.164152	1.50265
32	tr|A0A833RNQ4|A0A833RNQ4	9HYME	N-sulfoglucosamine sulfohydrolase OS=Frieseomelitta varia OX=561572 GN=E2986_04882 PE=3 SV=1	0.0776693	0.296632
33	tr|A0A833VWR2|A0A833VWR2	9HYME	ATP synthase subunit beta OS=Frieseomelitta varia OX=561572 GN=E2986_04314 PE=3 SV=1	0.0169723	5.72523
34	tr|A0A833W1S3|A0A833W1S3	9HYME	Glucosamine-6-phosphate isomerase OS=Frieseomelitta varia OX=561572 GN=E2986_00222 PE=3 SV=1	0.784603	1.03793
35	tr|A0A1C4ADY6|A0A1C4ADY6	9LACO	TetR family transcriptional regulator OS=Lactobacillus apis OX=303541 GN=GCM10007323_09590 PE=4 SV=1	0.000116369	0.180974
36	tr|A0A089XL96|A0A089XL96	9LACT	Glyceraldehyde-3-phosphate dehydrogenase OS=Lactococcus lactis OX=1358 GN=gap_2 PE=3 SV=1	0.599707	0.749541
37	tr|T0L0J8|T0L0J8	9MICR	Pyrimidine 5-nucleotidase OS=Nosema apis BRL 01 OX=1037528 GN=NAPIS_ORF01338 PE=4 SV=1	0.786969	0.907071
38	tr|A0A821LMA2|A0A821LMA2	9NEOB	(mimic poison frog) hypothetical protein OS=Ranitomeya imitator OX=111125 GN=RIMITATOR_LOCUS2546326 PE=4 SV=1	0.103219	0.225399
39	tr|A0A822GLX5|A0A822GLX5	9NEOB	Serotransferrin OS=Ranitomeya imitator OX=111125 GN=RIMITATOR_LOCUS11024298 PE=3 SV=1	0.0110964	0.289403
40	tr|A0A821C5G8|A0A821C5G8	9NEOB	Vacuolar proton pump subunit B OS=Ranitomeya imitator OX=111125 GN=RIMITATOR_LOCUS246741 PE=3 SV=1	0.0540254	1.73343
41	tr|A0A821XWY2|A0A821XWY2	9NEOB	(mimic poison frog) hypothetical protein OS=Ranitomeya imitator OX=111125 GN=RIMITATOR_LOCUS5644991 PE=3 SV=1	0.347837	0.0104212
42	tr|A0A821Z0Z9|A0A821Z0Z9	9NEOB	(mimic poison frog) hypothetical protein OS=Ranitomeya imitator OX=111125 GN=RIMITATOR_LOCUS5945034 PE=3 SV=1	0.351532	0.00559373
43	tr|A0A821UX93|A0A821UX93	9NEOB	(mimic poison frog) hypothetical protein OS=Ranitomeya imitator OX=111125 GN=RIMITATOR_LOCUS4752225 PE=3 SV=1	0.0063289	0.464623
44	tr|A0A822FRT2|A0A822FRT2	9NEOB	(mimic poison frog) hypothetical protein OS=Ranitomeya imitator OX=111125 GN=RIMITATOR_LOCUS10167728 PE=3 SV=1	0.00360855	0.264837
45	tr|A0A822HYL0|A0A822HYL0	9NEOB	(mimic poison frog) hypothetical protein (Fragment) OS=Ranitomeya imitator OX=111125 GN=RIMITATOR_LOCUS13827994 PE=4 SV=1	0.00455211	0.570649
46	tr|A0A821Q934|A0A821Q934	9NEOB	Pentaxin OS=Ranitomeya imitator OX=111125 GN=RIMITATOR_LOCUS3504496 PE=3 SV=1	0.206776	0.313028
47	tr|A0A821PRI4|A0A821PRI4	9NEOB	(mimic poison frog) hypothetical protein OS=Ranitomeya imitator OX=111125 GN=RIMITATOR_LOCUS3330122 PE=3 SV=1	0.318101	0.5028
48	tr|A0A822I5U0|A0A822I5U0	9NEOB	(mimic poison frog) hypothetical protein OS=Ranitomeya imitator OX=111125 GN=RIMITATOR_LOCUS14598802 PE=3 SV=1	0.96291	0.974814
49	tr|A0A821LTU2|A0A821LTU2	9NEOB	Glyceraldehyde-3-phosphate dehydrogenase OS=Ranitomeya imitator OX=111125 GN=RIMITATOR_LOCUS2580193 PE=3 SV=1	0.0115292	0.230616
50	tr|A0A822AXZ5|A0A822AXZ5	9NEOB	(mimic poison frog) hypothetical protein OS=Ranitomeya imitator OX=111125 GN=RIMITATOR_LOCUS6965004 PE=3 SV=1	0.0266735	0.458125
51	tr|A0A821TAG2|A0A821TAG2	9NEOB	Proteasome subunit alpha type OS=Ranitomeya imitator OX=111125 GN=RIMITATOR_LOCUS4318678 PE=3 SV=1	0.0355362	0.3193
52	tr|A0A822ID78|A0A822ID78	9NEOB	(mimic poison frog) hypothetical protein (Fragment) OS=Ranitomeya imitator OX=111125 GN=RIMITATOR_LOCUS14164707 PE=3 SV=1	0.0040476	0.216275
53	tr|A0A821APD0|A0A821APD0	9NEOB	(mimic poison frog) hypothetical protein OS=Ranitomeya imitator OX=111125 GN=RIMITATOR_LOCUS5 PE=3 SV=1	0.344246	0.464895
54	tr|A0A822IFE0|A0A822IFE0	9NEOB	H(+)-transporting two-sector ATPase OS=Ranitomeya imitator OX=111125 GN=RIMITATOR_LOCUS15585792 PE=3 SV=1	0.500231	1.31792
55	tr|A0A2I9LNP4|A0A2I9LNP4	9SCOR	phosphopyruvate hydratase OS=Centruroides hentzi OX=88313 PE=3 SV=1	0.0712071	5.14922
56	tr|A0A2I9LP41|A0A2I9LP41	9SCOR	Heat shock 70 kDa protein OS=Centruroides hentzi OX=88313 PE=3 SV=1	0.00474027	2.08123
57	tr|A0A1W7RAT0|A0A1W7RAT0	9SCOR	Multifunctional fusion protein OS=Hadrurus spadix OX=141984 PE=3 SV=1	0.00662341	4.9695
58	tr|Q8B3M2|Q8B3M2	9VIRU	Genome polyprotein OS=Deformed wing virus OX=198112 PE=1 SV=2	0.134525	0.333771
59	tr|A0A2A3EBK6|A0A2A3EBK6	APICC	LIM domain-binding protein OS=Apis cerana cerana OX=94128 GN=APICC_09484 PE=4 SV=1	0.00788479	2.38804
60	tr|A0A2A3EJU2|A0A2A3EJU2	APICC	Retinal dehydrogenase OS=Apis cerana cerana OX=94128 GN=APICC_00519 PE=3 SV=1	0.0282865	0.25753
61	tr|A0A2A3EBQ8|A0A2A3EBQ8	APICC	oxoglutarate dehydrogenase (succinyl-transferring) OS=Apis cerana cerana OX=94128 GN=APICC_00427 PE=3 SV=1	0.207437	1.78176
62	tr|A0A2A3E889|A0A2A3E889	APICC	Hexamerin OS=Apis cerana cerana OX=94128 GN=APICC_07564 PE=4 SV=1	0.0838432	0.413989
63	tr|L7ZBB3|L7ZBB3	APICE	alpha-glucosidase OS=Apis cerana indica OX=94129 PE=2 SV=1	6.57678e-07	0.066686
64	tr|V9IG73|V9IG73	APICE	Actin, indirect flight muscle OS=Apis cerana OX=7461 GN=ACCB02987 PE=2 SV=1	0.0288353	10.1015
65	tr|V9IEZ2|V9IEZ2	APICE	Heat shock protein OS=Apis cerana OX=7461 GN=ACCB03694 PE=2 SV=1	0.132594	1.42041
66	tr|V9IFD6|V9IFD6	APICE	ATP synthase subunit alpha OS=Apis cerana OX=7461 GN=ACCB04724 PE=2 SV=1	0.0465491	2.51217
67	tr|V9IF40|V9IF40	APICE	Fructose-bisphosphate aldolase OS=Apis cerana OX=7461 GN=ACCB01997.1 PE=2 SV=1	0.000308465	12.9338
68	tr|V9IHT5|V9IHT5	APICE	Aconitate hydratase, mitochondrial OS=Apis cerana OX=7461 GN=ACCB09718 PE=2 SV=1	0.108713	2.508
69	tr|V9II55|V9II55	APICE	Heat shock protein OS=Apis cerana OX=7461 GN=ACCB10163 PE=2 SV=1	0.0606389	1.93111
70	tr|V9II66|V9II66	APICE	Cofilin/actin-depolymerizing factor OS=Apis cerana OX=7461 GN=ACCB08393 PE=2 SV=1	0.000209166	2.02559
71	tr|V9IF19|V9IF19	APICE	Elongation factor 2 OS=Apis cerana OX=7461 GN=ACCB01965.1 PE=2 SV=1	0.221974	1.33848
72	tr|V9I6X1|V9I6X1	APICE	Ubiquitin OS=Apis cerana OX=7461 GN=ACCB00063.1 PE=2 SV=1	0.0580394	1.8351
73	tr|V9IK10|V9IK10	APICE	Stress-70 protein OS=Apis cerana OX=7461 GN=ACCB12548 PE=2 SV=1	0.194825	1.56107
74	tr|V9IK78|V9IK78	APICE	Tubulin beta chain OS=Apis cerana OX=7461 GN=ACCB10461 PE=2 SV=1	0.463872	1.19024
75	tr|V9IET2|V9IET2	APICE	Peroxiredoxin-6 OS=Apis cerana OX=7461 GN=ACCB01659.1 PE=2 SV=1	0.0426149	0.321185
76	tr|V9IL23|V9IL23	APICE	peptidylprolyl isomerase OS=Apis cerana OX=7461 GN=ACCB10792 PE=2 SV=1	0.0413381	1.59477
77	tr|V9IJY9|V9IJY9	APICE	Stress-induced-phosphoprotein 1 OS=Apis cerana OX=7461 GN=ACCB10665 PE=2 SV=1	0.00444297	3.75295
78	tr|V9IHC2|V9IHC2	APICE	Calreticulin OS=Apis cerana OX=7461 GN=ACCB09043 PE=2 SV=1	0.498677	1.30441
79	tr|V9ID72|V9ID72	APICE	Isocitrate dehydrogenase [NAD] subunit, mitochondrial OS=Apis cerana OX=7461 GN=ACCB01186.2 PE=2 SV=1	0.447231	1.41719
80	tr|V9IE59|V9IE59	APICE	Tubulin alpha chain OS=Apis cerana OX=7461 GN=ACCB02368 PE=2 SV=1	0.810524	1.09527
81	tr|V9IF54|V9IF54	APICE	Myosin light chain alkali OS=Apis cerana OX=7461 GN=ACCB02010 PE=2 SV=1	0.03924	30.2891
82	tr|V9IA83|V9IA83	APICE	Alpha,alpha-trehalose-phosphate synthase [UDP-forming] A OS=Apis cerana OX=7461 GN=ACCB00544.1 PE=2 SV=1	0.117107	3.12945
83	tr|V9ID91|V9ID91	APICE	RNA helicase OS=Apis cerana OX=7461 GN=ACCB01212.1 PE=2 SV=1	0.503138	0.783445
84	tr|V9ID93|V9ID93	APICE	Annexin OS=Apis cerana OX=7461 GN=ACCB01033.2 PE=2 SV=1	0.0968859	0.509593
85	tr|V9I8N5|V9I8N5	APICE	Calpain-3 OS=Apis cerana OX=7461 GN=ACCB00047.5 PE=2 SV=1	0.0841882	0.431292
86	tr|V9IKB3|V9IKB3	APICE	Ribosomal protein L15 OS=Apis cerana OX=7461 GN=ACCB10605 PE=2 SV=1	0.652417	1.37135
87	tr|V9ILS0|V9ILS0	APICE	Amphiphysin OS=Apis cerana OX=7461 GN=ACCB11611 PE=2 SV=1	0.00104619	4.34173
88	tr|V9II07|V9II07	APICE	Elongation factor 1-gamma OS=Apis cerana OX=7461 GN=ACCB09979 PE=2 SV=1	0.654606	1.22957
89	tr|V9IKQ3|V9IKQ3	APICE	alanine transaminase OS=Apis cerana OX=7461 GN=ACCB10441 PE=2 SV=1	0.000360326	3.87834
90	tr|V9IIF6|V9IIF6	APICE	Prohibitin OS=Apis cerana OX=7461 GN=ACCB07116 PE=2 SV=1	0.0412781	0.148838
91	tr|V9IBB9|V9IBB9	APICE	Spermine synthase OS=Apis cerana OX=7461 GN=ACCB00956.1 PE=2 SV=1	0.273722	1.40686
92	tr|V9I7W9|V9I7W9	APICE	Calmodulin OS=Apis cerana OX=7461 GN=ACCB00053.1 PE=2 SV=1	0.0251416	0.0520391
93	tr|V9IH34|V9IH34	APICE	10 kDa heat shock protein, mitochondrial OS=Apis cerana OX=7461 GN=ACCB08512 PE=2 SV=1	0.0737273	2.69121
94	tr|V9IJF3|V9IJF3	APICE	Glutathione S-transferase OS=Apis cerana OX=7461 GN=ACCB11368 PE=2 SV=1	0.00012697	7.41972
95	tr|Q7YXM6|Q7YXM6	APILI	Superoxide dismutase [Cu-Zn] OS=Apis mellifera ligustica OX=7469 GN=Sod1 PE=2 SV=1	0.0846858	0.875734
96	tr|Q7YXM5|Q7YXM5	APILI	Superoxide dismutase (Fragment) OS=Apis mellifera ligustica OX=7469 GN=Sod2 PE=2 SV=1	0.186892	0.327231
97	tr|A0A7M7KXM0|A0A7M7KXM0	APIME	twitchin isoform X2 OS=Apis mellifera OX=7460 GN=LOC409821 PE=3 SV=1	0.168495	0.60729
98	tr|A0A7M7GLV1|A0A7M7GLV1	APIME	tropomyosin-1 OS=Apis mellifera OX=7460 GN=408414 PE=3 SV=1	0.163158	2.31225
99	tr|A0A088AHC8|A0A088AHC8	APIME	Glyceraldehyde-3-phosphate dehydrogenase OS=Apis mellifera OX=7460 GN=410122 PE=2 SV=1	0.000224674	0.274613
100	tr|A0A7M7GX00|A0A7M7GX00	APIME	troponin I isoform X18 OS=Apis mellifera OX=7460 GN=410815 PE=4 SV=1	0.294146	1.92355
101	tr|A4ZXC4|A4ZXC4	APIME	Triosephosphate isomerase OS=Apis mellifera OX=7460 GN=Tpi PE=2 SV=1	0.0163772	0.282337
102	tr|A0A7M7R758|A0A7M7R758	APIME	Dihydrolipoyl dehydrogenase OS=Apis mellifera OX=7460 GN=551039 PE=3 SV=1	0.0346249	0.369965
103	tr|Q25BT7|Q25BT7	APIME	alpha-glucosidase OS=Apis mellifera OX=7460 GN=hbg2 PE=4 SV=1	0.00538701	0.225612
104	tr|A0A7M7GV60|A0A7M7GV60	APIME	troponin C type I isoform X3 OS=Apis mellifera OX=7460 GN=411659 PE=4 SV=1	0.0335392	2.4575
105	tr|A0A7M7L2X0|A0A7M7L2X0	APIME	filamin-like isoform X2 OS=Apis mellifera OX=7460 GN=LOC409697 PE=3 SV=1	0.0394343	0.696595
106	tr|A0A7M7G8Z8|A0A7M7G8Z8	APIME	peroxiredoxin 1 OS=Apis mellifera OX=7460 GN=LOC409954 PE=3 SV=1	0.304864	1.31943
107	tr|A0A7M7LSZ9|A0A7M7LSZ9	APIME	myosin heavy chain, muscle isoform X3 OS=Apis mellifera OX=7460 GN=LOC409843 PE=3 SV=1	0.216014	3.17161
108	tr|A0A7M7H421|A0A7M7H421	APIME	Alpha-galactosidase OS=Apis mellifera OX=7460 GN=LOC725899 PE=3 SV=1	0.00101707	0.390511
109	tr|A0A7M7ML48|A0A7M7ML48	APIME	titin isoform X18 OS=Apis mellifera OX=7460 GN=LOC551259 PE=4 SV=1	0.130146	1.44685
110	tr|Q25BT8|Q25BT8	APIME	alpha-glucosidase OS=Apis mellifera OX=7460 GN=hbg1 PE=4 SV=1	0.444289	0.780322
111	tr|A0A7M7GX24|A0A7M7GX24	APIME	Transgelin OS=Apis mellifera OX=7460 GN=LOC408972 PE=3 SV=1	0.00607581	12.7669
112	tr|A0A7M7SQ18|A0A7M7SQ18	APIME	apolipophorins OS=Apis mellifera OX=7460 GN=LOC408961 PE=4 SV=1	0.262621	0.523374
113	tr|A0A7M7MXY7|A0A7M7MXY7	APIME	1,4-alpha-glucan branching enzyme OS=Apis mellifera OX=7460 GN=LOC727168 PE=3 SV=1	0.858225	0.924089
114	tr|A0A7M6UVC2|A0A7M6UVC2	APIME	heat shock protein Hsp70Ab-like OS=Apis mellifera OX=7460 GN=410620 PE=3 SV=1	0.165338	1.47062
115	tr|A0A7M7M151|A0A7M7M151	APIME	Glycogen debranching enzyme OS=Apis mellifera OX=7460 GN=LOC411488 PE=3 SV=1	0.00416894	40.1417
116	tr|A0A7M7TEZ5|A0A7M7TEZ5	APIME	uncharacterized protein LOC409805 isoform X2 OS=Apis mellifera OX=7460 GN=LOC409805 PE=4 SV=1	0.213149	3.81779
117	tr|A0A7M7R616|A0A7M7R616	APIME	phosphoenolpyruvate carboxykinase (GTP) OS=Apis mellifera OX=7460 GN=LOC412843 PE=3 SV=1	0.112926	8.22173
118	tr|A0A7M7IJ14|A0A7M7IJ14	APIME	transmembrane protease serine 11B-like protein OS=Apis mellifera OX=7460 GN=LOC726352 PE=4 SV=1	0.198513	0.39466
119	tr|A0A7M7SRL2|A0A7M7SRL2	APIME	talin-1 isoform X1 OS=Apis mellifera OX=7460 GN=LOC551272 PE=4 SV=1	0.0382106	1.77995
120	tr|A0A7M7RB96|A0A7M7RB96	APIME	aldose reductase OS=Apis mellifera OX=7460 GN=551968 PE=4 SV=1	0.00197087	4.08008
121	tr|A0A7M7G1K4|A0A7M7G1K4	APIME	serine protease 53 OS=Apis mellifera OX=7460 GN=LOC724308 PE=4 SV=1	0.515323	0.601821
122	tr|A0A7D5HR60|A0A7D5HR60	APIME	Malate dehydrogenase OS=Apis mellifera OX=7460 PE=2 SV=1	0.813936	1.08358
123	tr|A0A7M7R8J0|A0A7M7R8J0	APIME	Dihydrolipoamide acetyltransferase component of pyruvate dehydrogenase complex OS=Apis mellifera OX=7460 GN=551631 PE=3 SV=1	0.012909	0.125573
124	tr|A0A7M7LQ78|A0A7M7LQ78	APIME	Carboxypeptidase Q OS=Apis mellifera OX=7460 GN=410149 PE=4 SV=1	0.281544	2.77273
125	tr|A0A7M7L4A7|A0A7M7L4A7	APIME	heterogeneous nuclear ribonucleoprotein Q isoform X7 OS=Apis mellifera OX=7460 GN=LOC408775 PE=4 SV=1	0.770035	1.11876
126	tr|Q6VQ13|Q6VQ13	APIME	ADP/ATP translocase OS=Apis mellifera OX=7460 GN=406075 PE=2 SV=1	0.0822831	0.393833
127	tr|A0A7M7GQ45|A0A7M7GQ45	APIME	Alpha-1,4 glucan phosphorylase OS=Apis mellifera OX=7460 GN=409267 PE=3 SV=1	0.00144144	6.04727
128	tr|A0A7M7L1X5|A0A7M7L1X5	APIME	Proteasome subunit alpha type OS=Apis mellifera OX=7460 GN=LOC100578243 PE=3 SV=1	0.505038	0.762328
129	tr|A0A7M7GWN5|A0A7M7GWN5	APIME	arylsulfatase B OS=Apis mellifera OX=7460 GN=552073 PE=3 SV=1	0.0926934	0.073197
130	tr|A0A7M7TFV4|A0A7M7TFV4	APIME	zinc carboxypeptidase OS=Apis mellifera OX=7460 GN=551524 PE=3 SV=1	0.0825706	0.22216
131	tr|A0A7M7MP16|A0A7M7MP16	APIME	transmembrane protease serine 9-like OS=Apis mellifera OX=7460 GN=LOC113219006 PE=4 SV=1	0.1935	0.503509
132	tr|A0A7M7GE53|A0A7M7GE53	APIME	uncharacterized protein LOC100577527 OS=Apis mellifera OX=7460 GN=100577527 PE=4 SV=1	0.31876	0.172434
133	tr|A0A7M7MMK3|A0A7M7MMK3	APIME	Superoxide dismutase [Cu-Zn] OS=Apis mellifera OX=7460 GN=LOC113218958 PE=3 SV=1	2.35521e-06	0.205224
134	tr|A0A7M7G911|A0A7M7G911	APIME	uncharacterized protein LOC727243 OS=Apis mellifera OX=7460 GN=LOC727243 PE=4 SV=1	0.76263	1.05124
135	tr|A0A7M7TFB5|A0A7M7TFB5	APIME	muscle LIM protein Mlp84B isoform X2 OS=Apis mellifera OX=7460 GN=411285 PE=4 SV=1	0.0160068	34.5973
136	tr|A0A7M7RBB8|A0A7M7RBB8	APIME	Eukaryotic translation initiation factor 2A OS=Apis mellifera OX=7460 GN=552764 PE=3 SV=1	7.20234e-05	7.26476
137	tr|A0A7M7G1N6|A0A7M7G1N6	APIME	NPC intracellular cholesterol transporter 2 OS=Apis mellifera OX=7460 GN=724386 PE=3 SV=1	0.0865904	0.377686
138	tr|R9QKY2|R9QKY2	BOMHU	Glucose-6-phosphate isomerase (Fragment) OS=Bombus humilis OX=65597 GN=Pgi PE=3 SV=1	0.0429542	6.37197
139	tr|A0A6P3TVX4|A0A6P3TVX4	BOMTE	myosin heavy chain, muscle isoform X28 OS=Bombus terrestris OX=30195 GN=LOC100647343 PE=3 SV=1	0.0751273	4.80048
140	tr|A0A6P5HR09|A0A6P5HR09	BOMTE	LOW QUALITY PROTEIN: titin OS=Bombus terrestris OX=30195 GN=LOC100643650 PE=3 SV=1	0.148434	2.37264
141	tr|A0A6P3U6D2|A0A6P3U6D2	BOMTE	alpha-actinin, sarcomeric isoform X1 OS=Bombus terrestris OX=30195 GN=LOC100652204 PE=3 SV=1	0.00117399	5.62101
142	tr|A0A6P3TYQ7|A0A6P3TYQ7	BOMTE	paramyosin, long form OS=Bombus terrestris OX=30195 GN=LOC100644720 PE=4 SV=1	0.344249	1.73927
143	tr|A0A6P5I4V8|A0A6P5I4V8	BOMTE	troponin T, skeletal muscle isoform X3 OS=Bombus terrestris OX=30195 GN=LOC100648673 PE=3 SV=1	0.00488367	6.31246
144	tr|A0A6P3U581|A0A6P3U581	BOMTE	tropomyosin isoform X9 OS=Bombus terrestris OX=30195 GN=LOC100650354 PE=3 SV=1	0.377548	1.5543
145	tr|A0A6P5I2P0|A0A6P5I2P0	BOMTE	Calcium-transporting ATPase OS=Bombus terrestris OX=30195 GN=LOC100642652 PE=3 SV=1	0.0301354	0.249424
146	tr|A0A6P3DG53|A0A6P3DG53	BOMTE	uncharacterized protein LOC100650291 isoform X1 OS=Bombus terrestris OX=30195 GN=LOC100650291 PE=4 SV=1	0.202646	1.73586
147	tr|A0A6P5IEK0|A0A6P5IEK0	BOMTE	muscle LIM protein Mlp84B isoform X1 OS=Bombus terrestris OX=30195 GN=LOC100646273 PE=4 SV=1	0.0907724	3.03146
148	tr|A0A6P3DDE1|A0A6P3DDE1	BOMTE	Glyceraldehyde-3-phosphate dehydrogenase OS=Bombus terrestris OX=30195 GN=LOC100648830 PE=3 SV=1	0.00228846	10.9254
149	tr|A0A6P3D7G6|A0A6P3D7G6	BOMTE	Succinate--CoA ligase [ADP/GDP-forming] subunit alpha, mitochondrial OS=Bombus terrestris OX=30195 GN=LOC100652037 PE=3 SV=1	0.278923	1.53344
150	tr|A0A6P3DGF4|A0A6P3DGF4	BOMTE	Phosphoglycerate mutase OS=Bombus terrestris OX=30195 GN=LOC100651143 PE=3 SV=1	0.360208	1.70916
151	tr|A0A6P3D7P7|A0A6P3D7P7	BOMTE	transketolase-like protein 2 isoform X2 OS=Bombus terrestris OX=30195 GN=LOC100649799 PE=4 SV=1	0.177271	0.521281
152	tr|A0A6P3DB16|A0A6P3DB16	BOMTE	actin-interacting protein 1 isoform X1 OS=Bombus terrestris OX=30195 GN=LOC100645373 PE=4 SV=1	0.00474645	4.99395
153	tr|A0A6P3DLV5|A0A6P3DLV5	BOMTE	heat shock protein beta-1 isoform X2 OS=Bombus terrestris OX=30195 GN=LOC100644627 PE=3 SV=1	7.90284e-05	9.77726
154	tr|A0A6P3D7Q5|A0A6P3D7Q5	BOMTE	cytochrome c OS=Bombus terrestris OX=30195 GN=LOC100648549 PE=3 SV=1	0.0690577	1.8113
155	tr|A0A6P3UDI8|A0A6P3UDI8	BOMTE	UTP--glucose-1-phosphate uridylyltransferase OS=Bombus terrestris OX=30195 GN=LOC100642664 PE=3 SV=1	0.0216583	2.28464
156	tr|A0A6P5I5Q8|A0A6P5I5Q8	BOMTE	Alpha-1,4 glucan phosphorylase OS=Bombus terrestris OX=30195 GN=LOC100642931 PE=3 SV=1	0.000260088	10.6237
157	tr|A0A6P3DG49|A0A6P3DG49	BOMTE	Calponin OS=Bombus terrestris OX=30195 GN=LOC100646158 PE=3 SV=1	0.896598	0.935249
158	tr|A0A6P3DIG8|A0A6P3DIG8	BOMTE	glutamate dehydrogenase [NAD(P)(+)] OS=Bombus terrestris OX=30195 GN=LOC100650055 PE=3 SV=1	0.108299	2.047
159	tr|A0A6P3UBI7|A0A6P3UBI7	BOMTE	Transferrin OS=Bombus terrestris OX=30195 GN=LOC100650460 PE=3 SV=1	0.586034	1.12374
160	tr|A0A6P3UBY6|A0A6P3UBY6	BOMTE	Transgelin OS=Bombus terrestris OX=30195 GN=LOC105666555 PE=3 SV=1	0.000508966	4.73152
161	tr|A0A6P3DJM2|A0A6P3DJM2	BOMTE	Malic enzyme OS=Bombus terrestris OX=30195 GN=LOC100642264 PE=3 SV=1	0.0133786	2.78781
162	tr|A0A6P3UHF6|A0A6P3UHF6	BOMTE	chitinase-like protein Idgf4 isoform X2 OS=Bombus terrestris OX=30195 GN=LOC100650230 PE=3 SV=1	0.541783	1.20892
163	tr|A0A6P3D672|A0A6P3D672	BOMTE	phosphoenolpyruvate carboxykinase (GTP) OS=Bombus terrestris OX=30195 GN=LOC100631088 PE=3 SV=1	0.0657866	31.462
164	tr|A0A6P3DPJ9|A0A6P3DPJ9	BOMTE	alpha-glucosidase OS=Bombus terrestris OX=30195 GN=LOC100649281 PE=4 SV=1	0.0371761	0.301756
165	tr|A0A6P5I2Y9|A0A6P5I2Y9	BOMTE	twitchin isoform X2 OS=Bombus terrestris OX=30195 GN=LOC100644118 PE=3 SV=1	0.00328798	12.7113
166	tr|A0A6P3TVX5|A0A6P3TVX5	BOMTE	1,4-alpha-glucan branching enzyme OS=Bombus terrestris OX=30195 GN=LOC100650166 PE=3 SV=1	0.0311568	9.44865
167	tr|A0A6P3DM36|A0A6P3DM36	BOMTE	Multifunctional fusion protein OS=Bombus terrestris OX=30195 GN=LOC100642390 PE=3 SV=1	0.0494369	2.00575
168	tr|A0A6P3U2G4|A0A6P3U2G4	BOMTE	uncharacterized protein LOC100647860 isoform X1 OS=Bombus terrestris OX=30195 GN=LOC100647860 PE=4 SV=1	0.109069	13.1329
169	tr|A0A6P3UK05|A0A6P3UK05	BOMTE	Annexin OS=Bombus terrestris OX=30195 GN=LOC100650720 PE=3 SV=1	0.175647	0.173224
170	tr|A0A6P3DHD5|A0A6P3DHD5	BOMTE	Pyruvate dehydrogenase E1 component subunit alpha OS=Bombus terrestris OX=30195 GN=LOC100643255 PE=4 SV=1	0.63446	0.806282
171	tr|A0A6P5I3K1|A0A6P5I3K1	BOMTE	laminin subunit beta-1 isoform X3 OS=Bombus terrestris OX=30195 GN=LOC100642555 PE=4 SV=1	0.394328	0.814087
172	tr|A0A6P3DFV2|A0A6P3DFV2	BOMTE	carbonyl reductase (NADPH) OS=Bombus terrestris OX=30195 GN=LOC100643942 PE=4 SV=1	0.0474945	0.193142
173	tr|A0A6P3U365|A0A6P3U365	BOMTE	uncharacterized protein LOC100642610 OS=Bombus terrestris OX=30195 GN=LOC100642610 PE=4 SV=1	0.0257403	0.11469
174	tr|A0A6P3UCY2|A0A6P3UCY2	BOMTE	Aspartate aminotransferase OS=Bombus terrestris OX=30195 GN=LOC100649476 PE=3 SV=1	0.743046	1.16633
175	tr|A0A6P3UJ18|A0A6P3UJ18	BOMTE	heat shock 70 kDa protein 4 isoform X2 OS=Bombus terrestris OX=30195 GN=LOC100646893 PE=3 SV=1	0.018182	1.76176
176	tr|A0A6P3UJ80|A0A6P3UJ80	BOMTE	Lactoylglutathione lyase OS=Bombus terrestris OX=30195 GN=LOC105667111 PE=3 SV=1	0.00689985	2.10432
177	tr|A0A6P3U6Y5|A0A6P3U6Y5	BOMTE	lamin-C isoform X2 OS=Bombus terrestris OX=30195 GN=LOC100648485 PE=3 SV=1	0.00104143	3.32758
178	tr|A0A6P5I3R1|A0A6P5I3R1	BOMTE	alpha-L-fucosidase OS=Bombus terrestris OX=30195 GN=LOC100644255 PE=3 SV=1	0.0578878	0.594685
179	tr|A0A6P3U6Z7|A0A6P3U6Z7	BOMTE	Phosphoglycerate kinase OS=Bombus terrestris OX=30195 GN=LOC100645172 PE=3 SV=1	0.045414	2.29324
180	tr|A0A6P5HFS8|A0A6P5HFS8	BOMTE	Phosphotransferase OS=Bombus terrestris OX=30195 GN=LOC100646701 PE=3 SV=1	1.52424e-05	15.0774
181	tr|A0A6P3DGE5|A0A6P3DGE5	BOMTE	serine protease 53-like OS=Bombus terrestris OX=30195 GN=LOC100650014 PE=4 SV=1	0.130849	0.374541
182	tr|A0A6P3DG00|A0A6P3DG00	BOMTE	LOW QUALITY PROTEIN: protein dj-1beta OS=Bombus terrestris OX=30195 GN=LOC100652254 PE=4 SV=1	0.00115548	4.92777
183	tr|A0A0A5SYN4|A0A0A5SYN4	CITFR	Glyceraldehyde-3-phosphate dehydrogenase OS=Citrobacter freundii OX=546 GN=gapA PE=3 SV=1	0.00289144	0.173943
184	tr|J3SBS4|J3SBS4	CROAD	alcohol dehydrogenase (NADP(+)) OS=Crotalus adamanteus OX=8729 PE=2 SV=1	5.59514e-07	16.3646
185	tr|A0A6L3RX62|A0A6L3RX62	CROSK	Cysteine/glutathione ABC transporter ATP-binding protein/permease CydC OS=Cronobacter sakazakii OX=28141 GN=cydC PE=4 SV=1	0.403823	0.566811
186	tr|A0A154PP88|A0A154PP88	DUFNO	Alpha-1,4 glucan phosphorylase OS=Dufourea novaeangliae OX=178035 GN=WN55_05258 PE=3 SV=1	8.28412e-05	10.0149
187	tr|A0A154PIM3|A0A154PIM3	DUFNO	Twitchin OS=Dufourea novaeangliae OX=178035 GN=WN55_03551 PE=3 SV=1	0.0024618	2.20183
188	tr|A0A154PKU8|A0A154PKU8	DUFNO	Malic enzyme (Fragment) OS=Dufourea novaeangliae OX=178035 GN=WN55_04023 PE=3 SV=1	7.5852e-05	4.53496
189	tr|A0A154P1T4|A0A154P1T4	DUFNO	oxoglutarate dehydrogenase (succinyl-transferring) OS=Dufourea novaeangliae OX=178035 GN=WN55_08696 PE=3 SV=1	0.0441081	5.27172
190	tr|A0A154PE24|A0A154PE24	DUFNO	phosphoenolpyruvate carboxykinase (GTP) OS=Dufourea novaeangliae OX=178035 GN=WN55_00797 PE=3 SV=1	0.112064	5.28535
191	tr|A0A154PEK6|A0A154PEK6	DUFNO	Citrate synthase OS=Dufourea novaeangliae OX=178035 GN=WN55_01373 PE=3 SV=1	0.000398543	5.19989
192	tr|A0A154PPS0|A0A154PPS0	DUFNO	phosphopyruvate hydratase OS=Dufourea novaeangliae OX=178035 GN=WN55_06053 PE=3 SV=1	0.302634	1.64382
193	tr|A0A154P3S2|A0A154P3S2	DUFNO	Muscle M-line assembly protein unc-89 OS=Dufourea novaeangliae OX=178035 GN=WN55_10496 PE=3 SV=1	0.0826663	1.49369
194	tr|A0A154PN63|A0A154PN63	DUFNO	Malate dehydrogenase OS=Dufourea novaeangliae OX=178035 GN=WN55_04126 PE=3 SV=1	0.00746262	3.00495
195	tr|A0A154PQ04|A0A154PQ04	DUFNO	Fructose-bisphosphate aldolase OS=Dufourea novaeangliae OX=178035 GN=WN55_06500 PE=3 SV=1	0.0677175	2.13555
196	tr|A0A154P1Q6|A0A154P1Q6	DUFNO	Elongation factor 1-alpha OS=Dufourea novaeangliae OX=178035 GN=WN55_06655 PE=3 SV=1	0.0264421	3.38876
197	tr|A0A154P208|A0A154P208	DUFNO	Transaldolase (Fragment) OS=Dufourea novaeangliae OX=178035 GN=WN55_05403 PE=3 SV=1	0.000718586	3.15004
198	tr|A0A154PL96|A0A154PL96	DUFNO	Pyruvate dehydrogenase E1 component subunit beta OS=Dufourea novaeangliae OX=178035 GN=WN55_03279 PE=4 SV=1	0.0718445	3.5368
199	tr|A0A154PNQ0|A0A154PNQ0	DUFNO	Sortilin-related receptor OS=Dufourea novaeangliae OX=178035 GN=WN55_05034 PE=3 SV=1	0.0935022	0.0389071
200	tr|A0A154PSQ8|A0A154PSQ8	DUFNO	Myosin heavy chain, muscle OS=Dufourea novaeangliae OX=178035 GN=WN55_08111 PE=3 SV=1	0.426107	0.665505
201	tr|A0A154PJN9|A0A154PJN9	DUFNO	Heat shock 70 kDa protein cognate 3 OS=Dufourea novaeangliae OX=178035 GN=WN55_03057 PE=3 SV=1	0.159268	0.794276
202	tr|A0A154PH97|A0A154PH97	DUFNO	phosphoglucomutase (alpha-D-glucose-1,6-bisphosphate-dependent) OS=Dufourea novaeangliae OX=178035 GN=WN55_02538 PE=3 SV=1	0.00531006	4.13531
203	tr|A0A154PI85|A0A154PI85	DUFNO	Heat shock protein 83 OS=Dufourea novaeangliae OX=178035 GN=WN55_01728 PE=3 SV=1	0.0476205	0.604077
204	tr|A0A154PS72|A0A154PS72	DUFNO	Profilin OS=Dufourea novaeangliae OX=178035 GN=WN55_07241 PE=3 SV=1	0.243511	0.303596
205	tr|A0A154PFC9|A0A154PFC9	DUFNO	Ornithine aminotransferase OS=Dufourea novaeangliae OX=178035 GN=WN55_02000 PE=3 SV=1	0.116564	2.59135
206	tr|A0A154NYA3|A0A154NYA3	DUFNO	Cytochrome c-2 OS=Dufourea novaeangliae OX=178035 GN=WN55_00636 PE=3 SV=1	0.0943778	1.41277
207	tr|A0A154PH44|A0A154PH44	DUFNO	Glycerol-3-phosphate dehydrogenase [NAD(+)] OS=Dufourea novaeangliae OX=178035 GN=WN55_02637 PE=3 SV=1	0.0222875	0.308153
208	tr|A0A154PHR8|A0A154PHR8	DUFNO	Coronin OS=Dufourea novaeangliae OX=178035 GN=WN55_03002 PE=3 SV=1	0.656338	0.816031
209	tr|A0A154PKM2|A0A154PKM2	DUFNO	Phosphotransferase OS=Dufourea novaeangliae OX=178035 GN=WN55_03968 PE=3 SV=1	0.00462059	2.74409
210	tr|A0A154PMQ1|A0A154PMQ1	DUFNO	Aminopeptidase OS=Dufourea novaeangliae OX=178035 GN=WN55_05364 PE=3 SV=1	0.0215536	0.186469
211	tr|A0A154PSS0|A0A154PSS0	DUFNO	Pyruvate kinase (Fragment) OS=Dufourea novaeangliae OX=178035 GN=WN55_07621 PE=3 SV=1	0.00175308	3.11285
212	tr|A0A154PAE9|A0A154PAE9	DUFNO	Glyceraldehyde-3-phosphate dehydrogenase OS=Dufourea novaeangliae OX=178035 GN=WN55_00307 PE=3 SV=1	0.240191	1.86922
213	tr|A0A154PRP5|A0A154PRP5	DUFNO	Glycerol-3-phosphate dehydrogenase OS=Dufourea novaeangliae OX=178035 GN=WN55_07222 PE=3 SV=1	0.368037	1.43132
214	tr|A0A154PIT4|A0A154PIT4	DUFNO	Rab GDP dissociation inhibitor OS=Dufourea novaeangliae OX=178035 GN=WN55_03567 PE=3 SV=1	0.401587	1.39164
215	tr|Q49P72|Q49P72	ECOLX	Outer membrane protein A OS=Escherichia coli OX=562 GN=ompA PE=3 SV=1	0.0512166	0.101164
216	tr|W8TGE9|W8TGE9	ECOLX	Thioredoxin OS=Escherichia coli OX=562 GN=trxA PE=3 SV=1	0.000106802	0.214495
217	tr|E2QJ06|E2QJ06	ECOLX	Elongation factor Tu OS=Escherichia coli OX=562 GN=tufA_2 PE=1 SV=1	0.683725	0.799038
218	tr|K4WKC0|K4WKC0	ECOLX	Enolase OS=Escherichia coli O111:H11 str. CVM9455 OX=1165939 GN=eno PE=3 SV=1	0.00523269	0.247619
219	tr|W8TPS1|W8TPS1	ECOLX	Isocitrate dehydrogenase [NADP] OS=Escherichia coli OX=562 GN=icdA PE=4 SV=1	0.306096	1.5488
220	tr|T1FY51|T1FY51	HELRO	Glutamine amidotransferase type-2 domain-containing protein OS=Helobdella robusta OX=6412 GN=20213749 PE=3 SV=1	0.333508	0.122021
221	tr|S6B291|S6B291	HUMAN	IgG H chain OS=Homo sapiens OX=9606 PE=1 SV=1	0.000405686	0.247946
222	tr|Q8TCD0|Q8TCD0	HUMAN	Ig-like domain-containing protein OS=Homo sapiens OX=9606 PE=1 SV=1	0.00725359	0.353057
223	tr|A0A8C6NUW2|A0A8C6NUW2	NOTFU	Serine/threonine-protein kinase receptor OS=Nothobranchius furzeri OX=105023 PE=3 SV=1	0.0612067	0.437442
224	tr|A7XZV8|A7XZV8	SIGCA	Heat shock protein 70 (Fragment) OS=Siganus canaliculatus OX=75042 GN=hsp70 PE=2 SV=1	0.543541	0.801279
225	tr|A4UA14|A4UA14	VESBA	Dipeptidylpeptidase IV OS=Vespa basalis OX=7444 GN=DPP4 PE=2 SV=1	0.015154	0.216516
226	tr|Q5Q049|Q5Q049	VESCR	Chemosensory protein OS=Vespa crabro OX=7445 GN=CSP-1 PE=2 SV=1	0.000463781	3.4768
227	tr|L0N3X9|L0N3X9	VESMA	Immune responsive protein 30 OS=Vespa mandarinia japonica OX=1053483 GN=IRP30 PE=2 SV=1	0.281167	0.583943
228	tr|E7CIJ1|E7CIJ1	VESMA	14-3-3 zeta (Fragment) OS=Vespa mandarinia OX=7446 PE=3 SV=1	0.472717	0.669426
229	tr|B7SD94|B7SD94	VESMG	Anticoagulant serine protease OS=Vespa magnifica OX=202807 PE=2 SV=1	8.03289e-07	0.150494
230	sp|C0HLL3|PA1	VESVE	Phospholipase A1 OS=Vespa velutina OX=202808 PE=1 SV=1	0.000346733	0.052014
231	sp|P0DMB9|VA5	VESVE	Venom allergen 5 OS=Vespa velutina OX=202808 PE=1 SV=2	0.00603205	0.0261424
232	sp|C0HLL4|HUGA	VESVE	Hyaluronidase A OS=Vespa velutina OX=202808 PE=1 SV=1	0.00197039	0.148845
233	sp|C0HLL5|HUGAB	VESVE	Hyaluronidase B OS=Vespa velutina OX=202808 PE=1 SV=1	0.000433819	0.280101
234	sp|P0DMB8|PA12B	VESVE	Phospholipase A1 verutoxin-2b (Fragment) OS=Vespa velutina OX=202808 PE=1 SV=1	0.0419599	0.0895
235	tr|A0A384ZVP9|A0A384ZVP9	VESVE	Chemosensory protein 1 (Fragment) OS=Vespa velutina OX=202808 PE=2 SV=1	0.00164571	0.302529
236	tr|G8IIT0|G8IIT0	VESVU	Vitellogenin OS=Vespula vulgaris OX=7454 PE=2 SV=1	0.000543091	17.7558
237	tr|A9CMG8|A9CMG8	VESXA	Hornet silk protein Vssilk 3 OS=Vespa xanthoptera OX=7448 GN=Vssilk3 PE=2 SV=1	0.0332683	0.454715
238	tr|A9CMG6|A9CMG6	VESXA	Hornet silk protein Vssilk 1 OS=Vespa xanthoptera OX=7448 GN=Vssilk1 PE=2 SV=1	0.122418	0.252202
239	tr|A9CMG7|A9CMG7	VESXA	Hornet silk protein Vssilk 2 OS=Vespa xanthoptera OX=7448 GN=Vssilk2 PE=2 SV=1	0.0624949	0.597891
240	tr|D6RU88|D6RU88	VESXA	Hornet silk protein Vssilk 4 OS=Vespa xanthoptera OX=7448 GN=Vssilk4 PE=2 SV=1	0.0328751	0.312402
