# Supplementary material for: Peeking into the Stingers: A Comprehensive SWATH-MS Study of the European Hornet Vespa crabro (Linnaeus, 1758) (Hymenoptera: Vespidae) Venom Sac Extracts
Source: Int J Mol Sci. 2024 Mar 28;25(7):3798. doi: 10.3390/ijms25073798 (PMC11011553; doi:10.3390/ijms25073798)
Supplement: Supplementary file 1 [file ijms-25-03798-s001.zip › Supplementary File S2.xlsx]

## Sheet: 195_Proteins
195 proteins from UniProtKB/Swiss-Prot accession on 2023.06.02. UniProtKB/Swiss-Prot is a high quality manually annotated and non-redundant protein sequence database, which brings together experimental results, computed features and scientific conclusions.
Black protein names show the non-dysregulated proteins between the Vespa crabro gynes and workers venom sac extracts
Green protein names show the upregulated proteins in the Vespa crabro gyne venom sac extract
Red protein names show the downregulated proteins in the Vespa crabro gyne venom sac extract
Blue cells show the known potential allergens
n	Entry	Entry Name	Protein names	Organism	Mass	Gene Ontology (biological process)	Gene Ontology (GO)	Gene Ontology (molecular function)	PubMed ID	Protein families	Taxonomic lineage	Tissue specificity	Allergenic Properties	Toxic dose
1	W8TGE9	W8TGE9_ECOLX	Thioredoxin	Escherichia coli	11807		protein-disulfide reductase activity [GO:0015035]	protein-disulfide reductase activity [GO:0015035]	26441869; 28221970; 28686503; 30286803; 29437920; 31642700; 31652858; 31477907; 32021174; 32739475; 32599678	Thioredoxin family	Escherichia (genus), Enterobacteriaceae (family), Enterobacterales (order), Gammaproteobacteria (class), Pseudomonadota (phylum), Bacteria (superkingdom), cellular organisms (no rank)
2	A0A1C4ADY6	A0A1C4ADY6_9LACO	TetR family transcriptional regulator	Lactobacillus apis	24897		DNA binding [GO:0003677]	DNA binding [GO:0003677]	30832757		Lactobacillus (genus), Lactobacillaceae (family), Lactobacillales (order), Bacilli (class), Bacillota (phylum), Terrabacteria group (no rank), Bacteria (superkingdom), cellular organisms (no rank)
3	S6B291	S6B291_HUMAN	IgG H chain	Homo sapiens (Human)	50871		membrane [GO:0016020]		24756303; 24463572; 26457433; 26237403; 26460020; 27560183; 29199990; 28526733; 28475892; 28548638; 28970495; 28783665; 29763554; 29898396; 29180448; 31126879; 32321830; 34019795		Homo (genus), Homininae (subfamily), Hominidae (family), Hominoidea (superfamily), Catarrhini (parvorder), Simiiformes (infraorder), Haplorrhini (suborder), Primates (order), Euarchontoglires (superorder), Boreoeutheria (no rank), Eutheria (no rank), Theria (no rank), Mammalia (class), Amniota (no rank), Tetrapoda (no rank), Dipnotetrapodomorpha (no rank), Sarcopterygii (superclass), Euteleostomi…
4	Q8TCD0	Q8TCD0_HUMAN	Ig-like domain-containing protein	Homo sapiens (Human)	26235		membrane [GO:0016020]		15489334; 18417480; 21076400; 21378967; 22362762; 24768348; 25320089; 28548638; 28970495; 28783665; 29898396; 29396163; 29180448; 29991715; 31100267; 31126879; 31306469; 30613781; 31004012; 31883801; 33731853		Homo (genus), Homininae (subfamily), Hominidae (family), Hominoidea (superfamily), Catarrhini (parvorder), Simiiformes (infraorder), Haplorrhini (suborder), Primates (order), Euarchontoglires (superorder), Boreoeutheria (no rank), Eutheria (no rank), Theria (no rank), Mammalia (class), Amniota (no rank), Tetrapoda (no rank), Dipnotetrapodomorpha (no rank), Sarcopterygii (superclass), Euteleostomi…
5	A0A0A5SYN4	A0A0A5SYN4_CITFR	Glyceraldehyde-3-phosphate dehydrogenase (EC 1.2.1.-)	Citrobacter freundii	35615	glucose metabolic process [GO:0006006]	glyceraldehyde-3-phosphate dehydrogenase (NAD+) (phosphorylating) activity [GO:0004365]; NAD binding [GO:0051287]; NADP binding [GO:0050661]; glucose metabolic process [GO:0006006]	glyceraldehyde-3-phosphate dehydrogenase (NAD+) (phosphorylating) activity [GO:0004365]; NAD binding [GO:0051287]; NADP binding [GO:0050661]	30286803	Glyceraldehyde-3-phosphate dehydrogenase family	Citrobacter freundii complex (no rank), Citrobacter (genus), Enterobacteriaceae (family), Enterobacterales (order), Gammaproteobacteria (class), Pseudomonadota (phylum), Bacteria (superkingdom), cellular organisms (no rank)
6	A0A0L0AQN9	A0A0L0AQN9_9ENTR	Major outer membrane lipoprotein Lpp	Klebsiella sp. RIT-PI-d	8403	lipid modification [GO:0030258]; periplasmic space organization [GO:0043580]	cell outer membrane [GO:0009279]; extracellular region [GO:0005576]; lipid binding [GO:0008289]; peptidoglycan binding [GO:0042834]; lipid modification [GO:0030258]; periplasmic space organization [GO:0043580]	lipid binding [GO:0008289]; peptidoglycan binding [GO:0042834]		Lpp family	unclassified Klebsiella (no rank), Klebsiella (genus), Klebsiella/Raoultella group (no rank), Enterobacteriaceae (family), Enterobacterales (order), Gammaproteobacteria (class), Pseudomonadota (phylum), Bacteria (superkingdom), cellular organisms (no rank)
7	A0A822FRT2	A0A822FRT2_9NEOB	(mimic poison frog) hypothetical protein	Ranitomeya imitator (mimic poison frog)	12000		hemoglobin complex [GO:0005833]; heme binding [GO:0020037]; metal ion binding [GO:0046872]; oxygen binding [GO:0019825]; oxygen carrier activity [GO:0005344]	heme binding [GO:0020037]; metal ion binding [GO:0046872]; oxygen binding [GO:0019825]; oxygen carrier activity [GO:0005344]		Globin family	Ranitomeya (genus), Dendrobatinae (subfamily), Dendrobatidae (family), Hyloidea (superfamily), Neobatrachia (suborder), Anura (order), Batrachia (superorder), Amphibia (class), Tetrapoda (no rank), Dipnotetrapodomorpha (no rank), Sarcopterygii (superclass), Euteleostomi (no rank), Teleostomi (no rank), Gnathostomata (no rank), Vertebrata (no rank), Craniata (subphylum), Chordata (phylum), Deutero…
8	A0A822ID78	A0A822ID78_9NEOB	(mimic poison frog) hypothetical protein	Ranitomeya imitator (mimic poison frog)	23890	lipid transport [GO:0006869]; lipoprotein metabolic process [GO:0042157]	extracellular region [GO:0005576]; lipid binding [GO:0008289]; lipid transport [GO:0006869]; lipoprotein metabolic process [GO:0042157]	lipid binding [GO:0008289]		Apolipoprotein A1/A4/E family	Ranitomeya (genus), Dendrobatinae (subfamily), Dendrobatidae (family), Hyloidea (superfamily), Neobatrachia (suborder), Anura (order), Batrachia (superorder), Amphibia (class), Tetrapoda (no rank), Dipnotetrapodomorpha (no rank), Sarcopterygii (superclass), Euteleostomi (no rank), Teleostomi (no rank), Gnathostomata (no rank), Vertebrata (no rank), Craniata (subphylum), Chordata (phylum), Deutero…
9	A0A821UX93	A0A821UX93_9NEOB	(mimic poison frog) hypothetical protein	Ranitomeya imitator (mimic poison frog)	35017	lipid transport [GO:0006869]; lipoprotein metabolic process [GO:0042157]	extracellular region [GO:0005576]; lipid binding [GO:0008289]; lipid transport [GO:0006869]; lipoprotein metabolic process [GO:0042157]	lipid binding [GO:0008289]		Apolipoprotein A1/A4/E family	Ranitomeya (genus), Dendrobatinae (subfamily), Dendrobatidae (family), Hyloidea (superfamily), Neobatrachia (suborder), Anura (order), Batrachia (superorder), Amphibia (class), Tetrapoda (no rank), Dipnotetrapodomorpha (no rank), Sarcopterygii (superclass), Euteleostomi (no rank), Teleostomi (no rank), Gnathostomata (no rank), Vertebrata (no rank), Craniata (subphylum), Chordata (phylum), Deutero…
10	A0A822GLX5	A0A822GLX5_9NEOB	Serotransferrin (Beta-1 metal-binding globulin) (Siderophilin)	Ranitomeya imitator (mimic poison frog)	76462	intracellular iron ion homeostasis [GO:0006879]; iron ion transmembrane transport [GO:0034755]	extracellular space [GO:0005615]; ferric iron binding [GO:0008199]; intracellular iron ion homeostasis [GO:0006879]; iron ion transmembrane transport [GO:0034755]	ferric iron binding [GO:0008199]		Transferrin family	Ranitomeya (genus), Dendrobatinae (subfamily), Dendrobatidae (family), Hyloidea (superfamily), Neobatrachia (suborder), Anura (order), Batrachia (superorder), Amphibia (class), Tetrapoda (no rank), Dipnotetrapodomorpha (no rank), Sarcopterygii (superclass), Euteleostomi (no rank), Teleostomi (no rank), Gnathostomata (no rank), Vertebrata (no rank), Craniata (subphylum), Chordata (phylum), Deutero…
11	A0A821LTU2	A0A821LTU2_9NEOB	Glyceraldehyde-3-phosphate dehydrogenase (EC 1.2.1.12)	Ranitomeya imitator (mimic poison frog)	35567	glucose metabolic process [GO:0006006]; glycolytic process [GO:0006096]	glyceraldehyde-3-phosphate dehydrogenase (NAD+) (phosphorylating) activity [GO:0004365]; NAD binding [GO:0051287]; NADP binding [GO:0050661]; glucose metabolic process [GO:0006006]; glycolytic process [GO:0006096]	glyceraldehyde-3-phosphate dehydrogenase (NAD+) (phosphorylating) activity [GO:0004365]; NAD binding [GO:0051287]; NADP binding [GO:0050661]		Glyceraldehyde-3-phosphate dehydrogenase family	Ranitomeya (genus), Dendrobatinae (subfamily), Dendrobatidae (family), Hyloidea (superfamily), Neobatrachia (suborder), Anura (order), Batrachia (superorder), Amphibia (class), Tetrapoda (no rank), Dipnotetrapodomorpha (no rank), Sarcopterygii (superclass), Euteleostomi (no rank), Teleostomi (no rank), Gnathostomata (no rank), Vertebrata (no rank), Craniata (subphylum), Chordata (phylum), Deutero…
12	A0A822HYL0	A0A822HYL0_9NEOB	(mimic poison frog) hypothetical protein	Ranitomeya imitator (mimic poison frog)	19022		peroxiredoxin activity [GO:0051920]	peroxiredoxin activity [GO:0051920]			Ranitomeya (genus), Dendrobatinae (subfamily), Dendrobatidae (family), Hyloidea (superfamily), Neobatrachia (suborder), Anura (order), Batrachia (superorder), Amphibia (class), Tetrapoda (no rank), Dipnotetrapodomorpha (no rank), Sarcopterygii (superclass), Euteleostomi (no rank), Teleostomi (no rank), Gnathostomata (no rank), Vertebrata (no rank), Craniata (subphylum), Chordata (phylum), Deutero…
13	A0A822AXZ5	A0A822AXZ5_9NEOB	(mimic poison frog) hypothetical protein	Ranitomeya imitator (mimic poison frog)	63208		keratin filament [GO:0045095]			Intermediate filament family	Ranitomeya (genus), Dendrobatinae (subfamily), Dendrobatidae (family), Hyloidea (superfamily), Neobatrachia (suborder), Anura (order), Batrachia (superorder), Amphibia (class), Tetrapoda (no rank), Dipnotetrapodomorpha (no rank), Sarcopterygii (superclass), Euteleostomi (no rank), Teleostomi (no rank), Gnathostomata (no rank), Vertebrata (no rank), Craniata (subphylum), Chordata (phylum), Deutero…
14	A0A821TAG2	A0A821TAG2_9NEOB	Proteasome subunit alpha type	Ranitomeya imitator (mimic poison frog)	27399	ubiquitin-dependent protein catabolic process [GO:0006511]	cytoplasm [GO:0005737]; nucleus [GO:0005634]; proteasome core complex, alpha-subunit complex [GO:0019773]; ubiquitin-dependent protein catabolic process [GO:0006511]			Peptidase T1A family	Ranitomeya (genus), Dendrobatinae (subfamily), Dendrobatidae (family), Hyloidea (superfamily), Neobatrachia (suborder), Anura (order), Batrachia (superorder), Amphibia (class), Tetrapoda (no rank), Dipnotetrapodomorpha (no rank), Sarcopterygii (superclass), Euteleostomi (no rank), Teleostomi (no rank), Gnathostomata (no rank), Vertebrata (no rank), Craniata (subphylum), Chordata (phylum), Deutero…
15	C0HLL5	HUGAB_VESVE	Hyaluronidase B (EC 3.2.1.35) (Vesp v 2B)	Vespa velutina (Asian yellow-legged hornet)	39110	carbohydrate metabolic process [GO:0005975]; defense response [GO:0006952]	extracellular region [GO:0005576]; hyalurononglucosaminidase activity [GO:0004415]; carbohydrate metabolic process [GO:0005975]; defense response [GO:0006952]	hyalurononglucosaminidase activity [GO:0004415]	25896434; 31923175	Glycosyl hydrolase 56 family	Vespa (genus), Vespinae (subfamily), Vespidae (family), Vespoidea (superfamily), Aculeata (infraorder), Apocrita (suborder), Hymenoptera (order), Endopterygota (cohort), Neoptera (infraclass), Pterygota (subclass), Dicondylia (no rank), Insecta (class), Hexapoda (subphylum), Pancrustacea (no rank), Mandibulata (no rank), Arthropoda (phylum), Panarthropoda (no rank), Ecdysozoa (no rank), Protostom…	TISSUE SPECIFICITY: Expressed by the venom gland. {ECO:0000305|PubMed:31923175}.
16	L7ZBB3	L7ZBB3_APICE	alpha-glucosidase (EC 3.2.1.20)	Apis cerana indica	66528	carbohydrate metabolic process [GO:0005975]	membrane [GO:0016020]; carbohydrate metabolic process [GO:0005975]				Apis cerana (species), Apis (genus), Apini (tribe), Apinae (subfamily), Apidae (family), Apoidea (superfamily), Aculeata (infraorder), Apocrita (suborder), Hymenoptera (order), Endopterygota (cohort), Neoptera (infraclass), Pterygota (subclass), Dicondylia (no rank), Insecta (class), Hexapoda (subphylum), Pancrustacea (no rank), Mandibulata (no rank), Arthropoda (phylum), Panarthropoda (no rank),…
17	B7SD94	B7SD94_VESMG	Anticoagulant serine protease	Vespa magnifica (Hornet)	34776	proteolysis [GO:0006508]	serine-type endopeptidase activity [GO:0004252]; proteolysis [GO:0006508]	serine-type endopeptidase activity [GO:0004252]	18308355		Vespa (genus), Vespinae (subfamily), Vespidae (family), Vespoidea (superfamily), Aculeata (infraorder), Apocrita (suborder), Hymenoptera (order), Endopterygota (cohort), Neoptera (infraclass), Pterygota (subclass), Dicondylia (no rank), Insecta (class), Hexapoda (subphylum), Pancrustacea (no rank), Mandibulata (no rank), Arthropoda (phylum), Panarthropoda (no rank), Ecdysozoa (no rank), Protostom…
18	A0A7M7MMK3	A0A7M7MMK3_APIME	Superoxide dismutase [Cu-Zn] (EC 1.15.1.1)	Apis mellifera (Honeybee)	18920		copper ion binding [GO:0005507]; superoxide dismutase activity [GO:0004784]	copper ion binding [GO:0005507]; superoxide dismutase activity [GO:0004784]		Cu-Zn superoxide dismutase family	Apis (genus), Apini (tribe), Apinae (subfamily), Apidae (family), Apoidea (superfamily), Aculeata (infraorder), Apocrita (suborder), Hymenoptera (order), Endopterygota (cohort), Neoptera (infraclass), Pterygota (subclass), Dicondylia (no rank), Insecta (class), Hexapoda (subphylum), Pancrustacea (no rank), Mandibulata (no rank), Arthropoda (phylum), Panarthropoda (no rank), Ecdysozoa (no rank), P…
19	A0A833W9A3	A0A833W9A3_9HYME	Proteasome subunit alpha type	Frieseomelitta varia	27250	proteasome-mediated ubiquitin-dependent protein catabolic process [GO:0043161]	cytoplasm [GO:0005737]; nucleus [GO:0005634]; proteasome core complex, alpha-subunit complex [GO:0019773]; proteasome-mediated ubiquitin-dependent protein catabolic process [GO:0043161]			Peptidase T1A family	Frieseomelitta (genus), Meliponini (tribe), Apinae (subfamily), Apidae (family), Apoidea (superfamily), Aculeata (infraorder), Apocrita (suborder), Hymenoptera (order), Endopterygota (cohort), Neoptera (infraclass), Pterygota (subclass), Dicondylia (no rank), Insecta (class), Hexapoda (subphylum), Pancrustacea (no rank), Mandibulata (no rank), Arthropoda (phylum), Panarthropoda (no rank), Ecdysoz…
20	A0A088AHC8	A0A088AHC8_APIME	Glyceraldehyde-3-phosphate dehydrogenase (EC 1.2.1.12)	Apis mellifera (Honeybee)	35883	glucose metabolic process [GO:0006006]; glycolytic process [GO:0006096]	glyceraldehyde-3-phosphate dehydrogenase (NAD+) (phosphorylating) activity [GO:0004365]; NAD binding [GO:0051287]; NADP binding [GO:0050661]; glucose metabolic process [GO:0006006]; glycolytic process [GO:0006096]	glyceraldehyde-3-phosphate dehydrogenase (NAD+) (phosphorylating) activity [GO:0004365]; NAD binding [GO:0051287]; NADP binding [GO:0050661]		Glyceraldehyde-3-phosphate dehydrogenase family	Apis (genus), Apini (tribe), Apinae (subfamily), Apidae (family), Apoidea (superfamily), Aculeata (infraorder), Apocrita (suborder), Hymenoptera (order), Endopterygota (cohort), Neoptera (infraclass), Pterygota (subclass), Dicondylia (no rank), Insecta (class), Hexapoda (subphylum), Pancrustacea (no rank), Mandibulata (no rank), Arthropoda (phylum), Panarthropoda (no rank), Ecdysozoa (no rank), P…
21	C0HLL3	PA1_VESVE	Phospholipase A1 (PLA1) (EC 3.1.1.32) (Vesp v 1)	Vespa velutina (Asian yellow-legged hornet)	33957	lipid metabolic process [GO:0006629]	extracellular region [GO:0005576]; 1-acyl-2-lysophosphatidylserine acylhydrolase activity [GO:0052740]; phosphatidylserine 1-acylhydrolase activity [GO:0052739]; phospholipase A1 activity [GO:0008970]; lipid metabolic process [GO:0006629]	1-acyl-2-lysophosphatidylserine acylhydrolase activity [GO:0052740]; phosphatidylserine 1-acylhydrolase activity [GO:0052739]; phospholipase A1 activity [GO:0008970]	25896434; 31923175	AB hydrolase superfamily, Lipase family	Vespa (genus), Vespinae (subfamily), Vespidae (family), Vespoidea (superfamily), Aculeata (infraorder), Apocrita (suborder), Hymenoptera (order), Endopterygota (cohort), Neoptera (infraclass), Pterygota (subclass), Dicondylia (no rank), Insecta (class), Hexapoda (subphylum), Pancrustacea (no rank), Mandibulata (no rank), Arthropoda (phylum), Panarthropoda (no rank), Ecdysozoa (no rank), Protostom…	TISSUE SPECIFICITY: Expressed by the venom gland. {ECO:0000305|PubMed:31923175}.
22	A0A7M7H421	A0A7M7H421_APIME	Alpha-galactosidase (EC 3.2.1.-)	Apis mellifera (Honeybee)	50392	carbohydrate metabolic process [GO:0005975]; lipid metabolic process [GO:0006629]	lysosome [GO:0005764]; hydrolase activity, hydrolyzing O-glycosyl compounds [GO:0004553]; carbohydrate metabolic process [GO:0005975]; lipid metabolic process [GO:0006629]	hydrolase activity, hydrolyzing O-glycosyl compounds [GO:0004553]		Glycosyl hydrolase 27 family	Apis (genus), Apini (tribe), Apinae (subfamily), Apidae (family), Apoidea (superfamily), Aculeata (infraorder), Apocrita (suborder), Hymenoptera (order), Endopterygota (cohort), Neoptera (infraclass), Pterygota (subclass), Dicondylia (no rank), Insecta (class), Hexapoda (subphylum), Pancrustacea (no rank), Mandibulata (no rank), Arthropoda (phylum), Panarthropoda (no rank), Ecdysozoa (no rank), P…
23	A0A384ZVP9	A0A384ZVP9_VESVE	Chemosensory protein 1	Vespa velutina (Asian yellow-legged hornet)	14814						Vespa (genus), Vespinae (subfamily), Vespidae (family), Vespoidea (superfamily), Aculeata (infraorder), Apocrita (suborder), Hymenoptera (order), Endopterygota (cohort), Neoptera (infraclass), Pterygota (subclass), Dicondylia (no rank), Insecta (class), Hexapoda (subphylum), Pancrustacea (no rank), Mandibulata (no rank), Arthropoda (phylum), Panarthropoda (no rank), Ecdysozoa (no rank), Protostom…
24	C0HLL4	HUGA_VESVE	Hyaluronidase A (EC 3.2.1.35) (Vesp v 2A)	Vespa velutina (Asian yellow-legged hornet)	40012	carbohydrate metabolic process [GO:0005975]; defense response [GO:0006952]	extracellular region [GO:0005576]; hyalurononglucosaminidase activity [GO:0004415]; carbohydrate metabolic process [GO:0005975]; defense response [GO:0006952]	hyalurononglucosaminidase activity [GO:0004415]	25896434; 31923175	Glycosyl hydrolase 56 family	Vespa (genus), Vespinae (subfamily), Vespidae (family), Vespoidea (superfamily), Aculeata (infraorder), Apocrita (suborder), Hymenoptera (order), Endopterygota (cohort), Neoptera (infraclass), Pterygota (subclass), Dicondylia (no rank), Insecta (class), Hexapoda (subphylum), Pancrustacea (no rank), Mandibulata (no rank), Arthropoda (phylum), Panarthropoda (no rank), Ecdysozoa (no rank), Protostom…	TISSUE SPECIFICITY: Expressed by the venom gland. {ECO:0000305|PubMed:31923175}.
25	Q25BT7	Q25BT7_APIME	alpha-glucosidase (EC 3.2.1.20)	Apis mellifera (Honeybee)	66568	carbohydrate metabolic process [GO:0005975]	carbohydrate metabolic process [GO:0005975]		15564675; 17073008; 17617712; 23419073; 24479613; 25331961; 32126122		Apis (genus), Apini (tribe), Apinae (subfamily), Apidae (family), Apoidea (superfamily), Aculeata (infraorder), Apocrita (suborder), Hymenoptera (order), Endopterygota (cohort), Neoptera (infraclass), Pterygota (subclass), Dicondylia (no rank), Insecta (class), Hexapoda (subphylum), Pancrustacea (no rank), Mandibulata (no rank), Arthropoda (phylum), Panarthropoda (no rank), Ecdysozoa (no rank), P…
26	P0DMB9	VA5_VESVE	Venom allergen 5 (Antigen 5) (allergen Vesp v 5)	Vespa velutina (Asian yellow-legged hornet)	22718		extracellular region [GO:0005576]		25896434; 10484737; 31923175	CRISP family	Vespa (genus), Vespinae (subfamily), Vespidae (family), Vespoidea (superfamily), Aculeata (infraorder), Apocrita (suborder), Hymenoptera (order), Endopterygota (cohort), Neoptera (infraclass), Pterygota (subclass), Dicondylia (no rank), Insecta (class), Hexapoda (subphylum), Pancrustacea (no rank), Mandibulata (no rank), Arthropoda (phylum), Panarthropoda (no rank), Ecdysozoa (no rank), Protostom…	TISSUE SPECIFICITY: Expressed by the venom gland. {ECO:0000269|PubMed:25896434}.	ALLERGEN: Causes an allergic reaction in human. {ECO:0000250}.
27	A0A833W2V6	A0A833W2V6_9HYME	Ras-related protein Rab-43	Frieseomelitta varia	45716		mitochondrial matrix [GO:0005759]; GTP binding [GO:0005525]; GTPase activity [GO:0003924]	GTP binding [GO:0005525]; GTPase activity [GO:0003924]		MAM33 family	Frieseomelitta (genus), Meliponini (tribe), Apinae (subfamily), Apidae (family), Apoidea (superfamily), Aculeata (infraorder), Apocrita (suborder), Hymenoptera (order), Endopterygota (cohort), Neoptera (infraclass), Pterygota (subclass), Dicondylia (no rank), Insecta (class), Hexapoda (subphylum), Pancrustacea (no rank), Mandibulata (no rank), Arthropoda (phylum), Panarthropoda (no rank), Ecdysoz…
28	A0A7M7R8J0	A0A7M7R8J0_APIME	Dihydrolipoamide acetyltransferase component of pyruvate dehydrogenase complex (EC 2.3.1.-)	Apis mellifera (Honeybee)	66914	acetyl-CoA biosynthetic process from pyruvate [GO:0006086]	pyruvate dehydrogenase complex [GO:0045254]; acyltransferase activity [GO:0016746]; acetyl-CoA biosynthetic process from pyruvate [GO:0006086]	acyltransferase activity [GO:0016746]		2-oxoacid dehydrogenase family	Apis (genus), Apini (tribe), Apinae (subfamily), Apidae (family), Apoidea (superfamily), Aculeata (infraorder), Apocrita (suborder), Hymenoptera (order), Endopterygota (cohort), Neoptera (infraclass), Pterygota (subclass), Dicondylia (no rank), Insecta (class), Hexapoda (subphylum), Pancrustacea (no rank), Mandibulata (no rank), Arthropoda (phylum), Panarthropoda (no rank), Ecdysozoa (no rank), P…
29	A0A833RCD6	A0A833RCD6_9HYME	Aminopeptidase (EC 3.4.11.-)	Frieseomelitta varia	111392	proteolysis [GO:0006508]	membrane [GO:0016020]; aminopeptidase activity [GO:0004177]; metallopeptidase activity [GO:0008237]; zinc ion binding [GO:0008270]; proteolysis [GO:0006508]	aminopeptidase activity [GO:0004177]; metallopeptidase activity [GO:0008237]; zinc ion binding [GO:0008270]		Peptidase M1 family	Frieseomelitta (genus), Meliponini (tribe), Apinae (subfamily), Apidae (family), Apoidea (superfamily), Aculeata (infraorder), Apocrita (suborder), Hymenoptera (order), Endopterygota (cohort), Neoptera (infraclass), Pterygota (subclass), Dicondylia (no rank), Insecta (class), Hexapoda (subphylum), Pancrustacea (no rank), Mandibulata (no rank), Arthropoda (phylum), Panarthropoda (no rank), Ecdysoz…
30	A4UA14	A4UA14_VESBA	Dipeptidylpeptidase IV (EC 3.4.14.5)	Vespa basalis (Hornet)	88495	proteolysis [GO:0006508]	dipeptidyl-peptidase activity [GO:0008239]; serine-type peptidase activity [GO:0008236]; proteolysis [GO:0006508]	dipeptidyl-peptidase activity [GO:0008239]; serine-type peptidase activity [GO:0008236]	17298553		Vespa (genus), Vespinae (subfamily), Vespidae (family), Vespoidea (superfamily), Aculeata (infraorder), Apocrita (suborder), Hymenoptera (order), Endopterygota (cohort), Neoptera (infraclass), Pterygota (subclass), Dicondylia (no rank), Insecta (class), Hexapoda (subphylum), Pancrustacea (no rank), Mandibulata (no rank), Arthropoda (phylum), Panarthropoda (no rank), Ecdysozoa (no rank), Protostom…
31	A4ZXC4	A4ZXC4_APIME	Triosephosphate isomerase (EC 5.3.1.1)	Apis mellifera (Honeybee)	26899	gluconeogenesis [GO:0006094]; glycolytic process [GO:0006096]	triose-phosphate isomerase activity [GO:0004807]; gluconeogenesis [GO:0006094]; glycolytic process [GO:0006096]	triose-phosphate isomerase activity [GO:0004807]	17073008; 24479613; 25331961	Triosephosphate isomerase family	Apis (genus), Apini (tribe), Apinae (subfamily), Apidae (family), Apoidea (superfamily), Aculeata (infraorder), Apocrita (suborder), Hymenoptera (order), Endopterygota (cohort), Neoptera (infraclass), Pterygota (subclass), Dicondylia (no rank), Insecta (class), Hexapoda (subphylum), Pancrustacea (no rank), Mandibulata (no rank), Arthropoda (phylum), Panarthropoda (no rank), Ecdysozoa (no rank), P…
32	A0A154PMQ1	A0A154PMQ1_DUFNO	Aminopeptidase (EC 3.4.11.-)	Dufourea novaeangliae (Sweat bee)	103994	proteolysis [GO:0006508]	membrane [GO:0016020]; aminopeptidase activity [GO:0004177]; metallopeptidase activity [GO:0008237]; zinc ion binding [GO:0008270]; proteolysis [GO:0006508]	aminopeptidase activity [GO:0004177]; metallopeptidase activity [GO:0008237]; zinc ion binding [GO:0008270]		Peptidase M1 family	Dufourea (genus), Rophitinae (subfamily), Halictidae (family), Apoidea (superfamily), Aculeata (infraorder), Apocrita (suborder), Hymenoptera (order), Endopterygota (cohort), Neoptera (infraclass), Pterygota (subclass), Dicondylia (no rank), Insecta (class), Hexapoda (subphylum), Pancrustacea (no rank), Mandibulata (no rank), Arthropoda (phylum), Panarthropoda (no rank), Ecdysozoa (no rank), Prot…
33	A0A154PH44	A0A154PH44_DUFNO	Glycerol-3-phosphate dehydrogenase [NAD(+)] (EC 1.1.1.8)	Dufourea novaeangliae (Sweat bee)	59464	carbohydrate metabolic process [GO:0005975]; glycerol-3-phosphate catabolic process [GO:0046168]; glycerophospholipid metabolic process [GO:0006650]	glycerol-3-phosphate dehydrogenase complex [GO:0009331]; glycerol-3-phosphate dehydrogenase [NAD(P)+] activity [GO:0047952]; NAD binding [GO:0051287]; protein homodimerization activity [GO:0042803]; carbohydrate metabolic process [GO:0005975]; glycerol-3-phosphate catabolic process [GO:0046168]; glycerophospholipid metabolic process [GO:0006650]	glycerol-3-phosphate dehydrogenase [NAD(P)+] activity [GO:0047952]; NAD binding [GO:0051287]; protein homodimerization activity [GO:0042803]		NAD-dependent glycerol-3-phosphate dehydrogenase family	Dufourea (genus), Rophitinae (subfamily), Halictidae (family), Apoidea (superfamily), Aculeata (infraorder), Apocrita (suborder), Hymenoptera (order), Endopterygota (cohort), Neoptera (infraclass), Pterygota (subclass), Dicondylia (no rank), Insecta (class), Hexapoda (subphylum), Pancrustacea (no rank), Mandibulata (no rank), Arthropoda (phylum), Panarthropoda (no rank), Ecdysozoa (no rank), Prot…
34	V9I7W9	V9I7W9_APICE	Calmodulin-A	Apis cerana (Indian honeybee)	16811		calcium ion binding [GO:0005509]	calcium ion binding [GO:0005509]			Apis (genus), Apini (tribe), Apinae (subfamily), Apidae (family), Apoidea (superfamily), Aculeata (infraorder), Apocrita (suborder), Hymenoptera (order), Endopterygota (cohort), Neoptera (infraclass), Pterygota (subclass), Dicondylia (no rank), Insecta (class), Hexapoda (subphylum), Pancrustacea (no rank), Mandibulata (no rank), Arthropoda (phylum), Panarthropoda (no rank), Ecdysozoa (no rank), P…
35	A0A2A3EJU2	A0A2A3EJU2_APICC	Retinal dehydrogenase	Apis cerana cerana (Oriental honeybee)	52843		oxidoreductase activity, acting on the aldehyde or oxo group of donors, NAD or NADP as acceptor [GO:0016620]	oxidoreductase activity, acting on the aldehyde or oxo group of donors, NAD or NADP as acceptor [GO:0016620]		Aldehyde dehydrogenase family	Apis cerana (species), Apis (genus), Apini (tribe), Apinae (subfamily), Apidae (family), Apoidea (superfamily), Aculeata (infraorder), Apocrita (suborder), Hymenoptera (order), Endopterygota (cohort), Neoptera (infraclass), Pterygota (subclass), Dicondylia (no rank), Insecta (class), Hexapoda (subphylum), Pancrustacea (no rank), Mandibulata (no rank), Arthropoda (phylum), Panarthropoda (no rank),…
36	D6RU88	D6RU88_VESXA	Hornet silk protein Vssilk 4	Vespa xanthoptera (Japanese yellow hornet) (Vespa simillima xanthoptera)	48061						Vespa simillima (species), Vespa (genus), Vespinae (subfamily), Vespidae (family), Vespoidea (superfamily), Aculeata (infraorder), Apocrita (suborder), Hymenoptera (order), Endopterygota (cohort), Neoptera (infraclass), Pterygota (subclass), Dicondylia (no rank), Insecta (class), Hexapoda (subphylum), Pancrustacea (no rank), Mandibulata (no rank), Arthropoda (phylum), Panarthropoda (no rank), Ecd…
37	A9CMG8	A9CMG8_VESXA	Hornet silk protein Vssilk 3	Vespa xanthoptera (Japanese yellow hornet) (Vespa simillima xanthoptera)	44109				17986776		Vespa simillima (species), Vespa (genus), Vespinae (subfamily), Vespidae (family), Vespoidea (superfamily), Aculeata (infraorder), Apocrita (suborder), Hymenoptera (order), Endopterygota (cohort), Neoptera (infraclass), Pterygota (subclass), Dicondylia (no rank), Insecta (class), Hexapoda (subphylum), Pancrustacea (no rank), Mandibulata (no rank), Arthropoda (phylum), Panarthropoda (no rank), Ecd…
38	A0A7M7R758	A0A7M7R758_APIME	Dihydrolipoyl dehydrogenase (EC 1.8.1.4)	Apis mellifera (Honeybee)	54525		dihydrolipoyl dehydrogenase activity [GO:0004148]; flavin adenine dinucleotide binding [GO:0050660]	dihydrolipoyl dehydrogenase activity [GO:0004148]; flavin adenine dinucleotide binding [GO:0050660]		Class-I pyridine nucleotide-disulfide oxidoreductase family	Apis (genus), Apini (tribe), Apinae (subfamily), Apidae (family), Apoidea (superfamily), Aculeata (infraorder), Apocrita (suborder), Hymenoptera (order), Endopterygota (cohort), Neoptera (infraclass), Pterygota (subclass), Dicondylia (no rank), Insecta (class), Hexapoda (subphylum), Pancrustacea (no rank), Mandibulata (no rank), Arthropoda (phylum), Panarthropoda (no rank), Ecdysozoa (no rank), P…
39	V9IIF6	V9IIF6_APICE	Prohibitin	Apis cerana (Indian honeybee)	32514		mitochondrial inner membrane [GO:0005743]			Prohibitin family	Apis (genus), Apini (tribe), Apinae (subfamily), Apidae (family), Apoidea (superfamily), Aculeata (infraorder), Apocrita (suborder), Hymenoptera (order), Endopterygota (cohort), Neoptera (infraclass), Pterygota (subclass), Dicondylia (no rank), Insecta (class), Hexapoda (subphylum), Pancrustacea (no rank), Mandibulata (no rank), Arthropoda (phylum), Panarthropoda (no rank), Ecdysozoa (no rank), P…
40	P0DMB8	PA12B_VESVE	Phospholipase A1 verutoxin-2b (PLA1) (VT-2b) (EC 3.1.1.32) (EC 3.1.1.5)	Vespa velutina (Asian yellow-legged hornet)	3012	killing of cells of another organism [GO:0031640]; lipid catabolic process [GO:0016042]	extracellular region [GO:0005576]; 1-acyl-2-lysophosphatidylserine acylhydrolase activity [GO:0052740]; lysophospholipase activity [GO:0004622]; phosphatidylserine 1-acylhydrolase activity [GO:0052739]; phospholipase A1 activity [GO:0008970]; killing of cells of another organism [GO:0031640]; lipid catabolic process [GO:0016042]	1-acyl-2-lysophosphatidylserine acylhydrolase activity [GO:0052740]; lysophospholipase activity [GO:0004622]; phosphatidylserine 1-acylhydrolase activity [GO:0052739]; phospholipase A1 activity [GO:0008970]	10484737	AB hydrolase superfamily, Lipase family	Vespa (genus), Vespinae (subfamily), Vespidae (family), Vespoidea (superfamily), Aculeata (infraorder), Apocrita (suborder), Hymenoptera (order), Endopterygota (cohort), Neoptera (infraclass), Pterygota (subclass), Dicondylia (no rank), Insecta (class), Hexapoda (subphylum), Pancrustacea (no rank), Mandibulata (no rank), Arthropoda (phylum), Panarthropoda (no rank), Ecdysozoa (no rank), Protostom…	TISSUE SPECIFICITY: Expressed by the venom gland. {ECO:0000305|PubMed:10484737}.	ALLERGEN: Causes an allergic reaction in human. {ECO:0000305|PubMed:10484737}.	TOXIC DOSE: LD(50) is 0.87 mg/kg by intravenous injection into mice (tail vein). {ECO:0000269|PubMed:10484737}.
41	V9IET2	V9IET2_APICE	Peroxiredoxin-6	Apis cerana (Indian honeybee)	25134		peroxiredoxin activity [GO:0051920]	peroxiredoxin activity [GO:0051920]		Peroxiredoxin family, Prx6 subfamily	Apis (genus), Apini (tribe), Apinae (subfamily), Apidae (family), Apoidea (superfamily), Aculeata (infraorder), Apocrita (suborder), Hymenoptera (order), Endopterygota (cohort), Neoptera (infraclass), Pterygota (subclass), Dicondylia (no rank), Insecta (class), Hexapoda (subphylum), Pancrustacea (no rank), Mandibulata (no rank), Arthropoda (phylum), Panarthropoda (no rank), Ecdysozoa (no rank), P…
42	A0A154PI85	A0A154PI85_DUFNO	Heat shock protein 83	Dufourea novaeangliae (Sweat bee)	82525		ATP binding [GO:0005524]; ATP hydrolysis activity [GO:0016887]; ATP-dependent protein folding chaperone [GO:0140662]; unfolded protein binding [GO:0051082]	ATP binding [GO:0005524]; ATP hydrolysis activity [GO:0016887]; ATP-dependent protein folding chaperone [GO:0140662]; unfolded protein binding [GO:0051082]		Heat shock protein 90 family	Dufourea (genus), Rophitinae (subfamily), Halictidae (family), Apoidea (superfamily), Aculeata (infraorder), Apocrita (suborder), Hymenoptera (order), Endopterygota (cohort), Neoptera (infraclass), Pterygota (subclass), Dicondylia (no rank), Insecta (class), Hexapoda (subphylum), Pancrustacea (no rank), Mandibulata (no rank), Arthropoda (phylum), Panarthropoda (no rank), Ecdysozoa (no rank), Prot…
43	J3SBS4	J3SBS4_CROAD	alcohol dehydrogenase (NADP(+)) (EC 1.1.1.2)	Crotalus adamanteus (Eastern diamondback rattlesnake)	37563	aldehyde catabolic process [GO:0046185]	apical plasma membrane [GO:0016324]; cytosol [GO:0005829]; alcohol dehydrogenase (NADP+) activity [GO:0008106]; aldehyde catabolic process [GO:0046185]	alcohol dehydrogenase (NADP+) activity [GO:0008106]	23025625	Aldo/keto reductase family	Crotalus (genus), Crotalinae (subfamily), Viperidae (family), Colubroidea (superfamily), Serpentes (infraorder), Toxicofera (no rank), Episquamata (no rank), Unidentata (no rank), Bifurcata (no rank), Squamata (order), Lepidosauria (class), Sauria (no rank), Sauropsida (no rank), Amniota (no rank), Tetrapoda (no rank), Dipnotetrapodomorpha (no rank), Sarcopterygii (superclass), Euteleostomi (no r…
44	A0A2I9LP41	A0A2I9LP41_9SCOR	Heat shock 70 kDa protein	Centruroides hentzi	70732		ATP binding [GO:0005524]; ATP-dependent protein folding chaperone [GO:0140662]	ATP binding [GO:0005524]; ATP-dependent protein folding chaperone [GO:0140662]	29248469	Heat shock protein 70 family	Centruroides (genus), Buthidae (family), Buthoidea (superfamily), Buthida (parvorder), Scorpiones (order), Arachnida (class), Chelicerata (subphylum), Arthropoda (phylum), Panarthropoda (no rank), Ecdysozoa (no rank), Protostomia (no rank), Bilateria (no rank), Eumetazoa (no rank), Metazoa (kingdom), Opisthokonta (no rank), Eukaryota (superkingdom), cellular organisms (no rank)
45	A0A1W7RAT0	A0A1W7RAT0_9SCOR	Multifunctional fusion protein [Includes: Delta-1-pyrroline-5-carboxylate dehydrogenase (P5C dehydrogenase) (L-glutamate gamma-semialdehyde dehydrogenase); L-glutamate gamma-semialdehyde dehydrogenase (EC 1.2.1.88)]	Hadrurus spadix	63343	proline catabolic process to glutamate [GO:0010133]	1-pyrroline-5-carboxylate dehydrogenase activity [GO:0003842]; proline catabolic process to glutamate [GO:0010133]	1-pyrroline-5-carboxylate dehydrogenase activity [GO:0003842]		Aldehyde dehydrogenase family	Hadrurus (genus), Hadrurinae (subfamily), Caraboctonidae (family), Iuroidea (superfamily), Iurida (parvorder), Scorpiones (order), Arachnida (class), Chelicerata (subphylum), Arthropoda (phylum), Panarthropoda (no rank), Ecdysozoa (no rank), Protostomia (no rank), Bilateria (no rank), Eumetazoa (no rank), Metazoa (kingdom), Opisthokonta (no rank), Eukaryota (superkingdom), cellular organisms (no …
46	A0A7M7RBB8	A0A7M7RBB8_APIME	Eukaryotic translation initiation factor 2A (eIF-2A)	Apis mellifera (Honeybee)	65292		translation initiation factor activity [GO:0003743]	translation initiation factor activity [GO:0003743]		WD repeat EIF2A family	Apis (genus), Apini (tribe), Apinae (subfamily), Apidae (family), Apoidea (superfamily), Aculeata (infraorder), Apocrita (suborder), Hymenoptera (order), Endopterygota (cohort), Neoptera (infraclass), Pterygota (subclass), Dicondylia (no rank), Insecta (class), Hexapoda (subphylum), Pancrustacea (no rank), Mandibulata (no rank), Arthropoda (phylum), Panarthropoda (no rank), Ecdysozoa (no rank), P…
47	A0A154PKU8	A0A154PKU8_DUFNO	Malic enzyme	Dufourea novaeangliae (Sweat bee)	68397		malate dehydrogenase (decarboxylating) (NAD+) activity [GO:0004471]; metal ion binding [GO:0046872]; NAD binding [GO:0051287]	malate dehydrogenase (decarboxylating) (NAD+) activity [GO:0004471]; metal ion binding [GO:0046872]; NAD binding [GO:0051287]		Malic enzymes family	Dufourea (genus), Rophitinae (subfamily), Halictidae (family), Apoidea (superfamily), Aculeata (infraorder), Apocrita (suborder), Hymenoptera (order), Endopterygota (cohort), Neoptera (infraclass), Pterygota (subclass), Dicondylia (no rank), Insecta (class), Hexapoda (subphylum), Pancrustacea (no rank), Mandibulata (no rank), Arthropoda (phylum), Panarthropoda (no rank), Ecdysozoa (no rank), Prot…
48	A0A154PP88	A0A154PP88_DUFNO	Alpha-1,4 glucan phosphorylase (EC 2.4.1.1)	Dufourea novaeangliae (Sweat bee)	97205	glycogen metabolic process [GO:0005977]	glycogen phosphorylase activity [GO:0008184]; linear malto-oligosaccharide phosphorylase activity [GO:0102250]; pyridoxal phosphate binding [GO:0030170]; SHG alpha-glucan phosphorylase activity [GO:0102499]; glycogen metabolic process [GO:0005977]	glycogen phosphorylase activity [GO:0008184]; linear malto-oligosaccharide phosphorylase activity [GO:0102250]; pyridoxal phosphate binding [GO:0030170]; SHG alpha-glucan phosphorylase activity [GO:0102499]		Glycogen phosphorylase family	Dufourea (genus), Rophitinae (subfamily), Halictidae (family), Apoidea (superfamily), Aculeata (infraorder), Apocrita (suborder), Hymenoptera (order), Endopterygota (cohort), Neoptera (infraclass), Pterygota (subclass), Dicondylia (no rank), Insecta (class), Hexapoda (subphylum), Pancrustacea (no rank), Mandibulata (no rank), Arthropoda (phylum), Panarthropoda (no rank), Ecdysozoa (no rank), Prot…
49	V9IJF3	V9IJF3_APICE	Glutathione S-transferase	Apis cerana (Indian honeybee)	23011		transferase activity [GO:0016740]	transferase activity [GO:0016740]			Apis (genus), Apini (tribe), Apinae (subfamily), Apidae (family), Apoidea (superfamily), Aculeata (infraorder), Apocrita (suborder), Hymenoptera (order), Endopterygota (cohort), Neoptera (infraclass), Pterygota (subclass), Dicondylia (no rank), Insecta (class), Hexapoda (subphylum), Pancrustacea (no rank), Mandibulata (no rank), Arthropoda (phylum), Panarthropoda (no rank), Ecdysozoa (no rank), P…
50	V9II66	V9II66_APICE	Cofilin/actin-depolymerizing factor	Apis cerana (Indian honeybee)	16832	actin filament depolymerization [GO:0030042]; regulation of cellular component biogenesis [GO:0044087]; regulation of cellular component organization [GO:0051128]	actin cytoskeleton [GO:0015629]; actin binding [GO:0003779]; actin filament depolymerization [GO:0030042]; regulation of cellular component biogenesis [GO:0044087]; regulation of cellular component organization [GO:0051128]	actin binding [GO:0003779]		Actin-binding proteins ADF family	Apis (genus), Apini (tribe), Apinae (subfamily), Apidae (family), Apoidea (superfamily), Aculeata (infraorder), Apocrita (suborder), Hymenoptera (order), Endopterygota (cohort), Neoptera (infraclass), Pterygota (subclass), Dicondylia (no rank), Insecta (class), Hexapoda (subphylum), Pancrustacea (no rank), Mandibulata (no rank), Arthropoda (phylum), Panarthropoda (no rank), Ecdysozoa (no rank), P…
51	A0A833W593	A0A833W593_9HYME	Titin	Frieseomelitta varia	2319169	anatomical structure morphogenesis [GO:0009653]; cell differentiation [GO:0030154]; protein phosphorylation [GO:0006468]	intracellular organelle [GO:0043229]; ATP binding [GO:0005524]; protein kinase activity [GO:0004672]; anatomical structure morphogenesis [GO:0009653]; cell differentiation [GO:0030154]; protein phosphorylation [GO:0006468]	ATP binding [GO:0005524]; protein kinase activity [GO:0004672]		Protein kinase superfamily, CAMK Ser/Thr protein kinase family	Frieseomelitta (genus), Meliponini (tribe), Apinae (subfamily), Apidae (family), Apoidea (superfamily), Aculeata (infraorder), Apocrita (suborder), Hymenoptera (order), Endopterygota (cohort), Neoptera (infraclass), Pterygota (subclass), Dicondylia (no rank), Insecta (class), Hexapoda (subphylum), Pancrustacea (no rank), Mandibulata (no rank), Arthropoda (phylum), Panarthropoda (no rank), Ecdysoz…
52	V9IF40	V9IF40_APICE	Fructose-bisphosphate aldolase (EC 4.1.2.13)	Apis cerana (Indian honeybee)	39632	glycolytic process [GO:0006096]	fructose-bisphosphate aldolase activity [GO:0004332]; glycolytic process [GO:0006096]	fructose-bisphosphate aldolase activity [GO:0004332]		Class I fructose-bisphosphate aldolase family	Apis (genus), Apini (tribe), Apinae (subfamily), Apidae (family), Apoidea (superfamily), Aculeata (infraorder), Apocrita (suborder), Hymenoptera (order), Endopterygota (cohort), Neoptera (infraclass), Pterygota (subclass), Dicondylia (no rank), Insecta (class), Hexapoda (subphylum), Pancrustacea (no rank), Mandibulata (no rank), Arthropoda (phylum), Panarthropoda (no rank), Ecdysozoa (no rank), P…
53	V9IKQ3	V9IKQ3_APICE	alanine transaminase (EC 2.6.1.2)	Apis cerana (Indian honeybee)	60716	biosynthetic process [GO:0009058]; L-alanine catabolic process [GO:0042853]	pyridoxal phosphate binding [GO:0030170]; transaminase activity [GO:0008483]; biosynthetic process [GO:0009058]; L-alanine catabolic process [GO:0042853]	pyridoxal phosphate binding [GO:0030170]; transaminase activity [GO:0008483]		Class-I pyridoxal-phosphate-dependent aminotransferase family, Alanine aminotransferase subfamily	Apis (genus), Apini (tribe), Apinae (subfamily), Apidae (family), Apoidea (superfamily), Aculeata (infraorder), Apocrita (suborder), Hymenoptera (order), Endopterygota (cohort), Neoptera (infraclass), Pterygota (subclass), Dicondylia (no rank), Insecta (class), Hexapoda (subphylum), Pancrustacea (no rank), Mandibulata (no rank), Arthropoda (phylum), Panarthropoda (no rank), Ecdysozoa (no rank), P…
54	A0A154PEK6	A0A154PEK6_DUFNO	Citrate synthase	Dufourea novaeangliae (Sweat bee)	43937	citrate metabolic process [GO:0006101]; tricarboxylic acid cycle [GO:0006099]	mitochondrial matrix [GO:0005759]; citrate (Si)-synthase activity [GO:0004108]; citrate metabolic process [GO:0006101]; tricarboxylic acid cycle [GO:0006099]	citrate (Si)-synthase activity [GO:0004108]		Citrate synthase family	Dufourea (genus), Rophitinae (subfamily), Halictidae (family), Apoidea (superfamily), Aculeata (infraorder), Apocrita (suborder), Hymenoptera (order), Endopterygota (cohort), Neoptera (infraclass), Pterygota (subclass), Dicondylia (no rank), Insecta (class), Hexapoda (subphylum), Pancrustacea (no rank), Mandibulata (no rank), Arthropoda (phylum), Panarthropoda (no rank), Ecdysozoa (no rank), Prot…
55	Q5Q049	Q5Q049_VESCR	Chemosensory protein	Vespa crabro (European hornet)	14995				15763466		Vespa (genus), Vespinae (subfamily), Vespidae (family), Vespoidea (superfamily), Aculeata (infraorder), Apocrita (suborder), Hymenoptera (order), Endopterygota (cohort), Neoptera (infraclass), Pterygota (subclass), Dicondylia (no rank), Insecta (class), Hexapoda (subphylum), Pancrustacea (no rank), Mandibulata (no rank), Arthropoda (phylum), Panarthropoda (no rank), Ecdysozoa (no rank), Protostom…
56	G8IIT0	G8IIT0_VESVU	Vitellogenin	Vespula vulgaris (Yellow jacket) (Wasp)	199689		lipid transporter activity [GO:0005319]	lipid transporter activity [GO:0005319]	23626765		Vespula (genus), Vespinae (subfamily), Vespidae (family), Vespoidea (superfamily), Aculeata (infraorder), Apocrita (suborder), Hymenoptera (order), Endopterygota (cohort), Neoptera (infraclass), Pterygota (subclass), Dicondylia (no rank), Insecta (class), Hexapoda (subphylum), Pancrustacea (no rank), Mandibulata (no rank), Arthropoda (phylum), Panarthropoda (no rank), Ecdysozoa (no rank), Protost…
57	A0A154P208	A0A154P208_DUFNO	Transaldolase (EC 2.2.1.2)	Dufourea novaeangliae (Sweat bee)	33742	carbohydrate metabolic process [GO:0005975]; pentose-phosphate shunt [GO:0006098]	cytoplasm [GO:0005737]; transaldolase activity [GO:0004801]; carbohydrate metabolic process [GO:0005975]; pentose-phosphate shunt [GO:0006098]	transaldolase activity [GO:0004801]		Transaldolase family, Type 1 subfamily	Dufourea (genus), Rophitinae (subfamily), Halictidae (family), Apoidea (superfamily), Aculeata (infraorder), Apocrita (suborder), Hymenoptera (order), Endopterygota (cohort), Neoptera (infraclass), Pterygota (subclass), Dicondylia (no rank), Insecta (class), Hexapoda (subphylum), Pancrustacea (no rank), Mandibulata (no rank), Arthropoda (phylum), Panarthropoda (no rank), Ecdysozoa (no rank), Prot…
58	V9ILS0	V9ILS0_APICE	Amphiphysin	Apis cerana (Indian honeybee)	46449		cytoplasm [GO:0005737]; intracellular organelle [GO:0043229]				Apis (genus), Apini (tribe), Apinae (subfamily), Apidae (family), Apoidea (superfamily), Aculeata (infraorder), Apocrita (suborder), Hymenoptera (order), Endopterygota (cohort), Neoptera (infraclass), Pterygota (subclass), Dicondylia (no rank), Insecta (class), Hexapoda (subphylum), Pancrustacea (no rank), Mandibulata (no rank), Arthropoda (phylum), Panarthropoda (no rank), Ecdysozoa (no rank), P…
59	A0A7M7GQ45	A0A7M7GQ45_APIME	Alpha-1,4 glucan phosphorylase (EC 2.4.1.1)	Apis mellifera (Honeybee)	97329	glycogen metabolic process [GO:0005977]	glycogen phosphorylase activity [GO:0008184]; linear malto-oligosaccharide phosphorylase activity [GO:0102250]; pyridoxal phosphate binding [GO:0030170]; SHG alpha-glucan phosphorylase activity [GO:0102499]; glycogen metabolic process [GO:0005977]	glycogen phosphorylase activity [GO:0008184]; linear malto-oligosaccharide phosphorylase activity [GO:0102250]; pyridoxal phosphate binding [GO:0030170]; SHG alpha-glucan phosphorylase activity [GO:0102499]		Glycogen phosphorylase family	Apis (genus), Apini (tribe), Apinae (subfamily), Apidae (family), Apoidea (superfamily), Aculeata (infraorder), Apocrita (suborder), Hymenoptera (order), Endopterygota (cohort), Neoptera (infraclass), Pterygota (subclass), Dicondylia (no rank), Insecta (class), Hexapoda (subphylum), Pancrustacea (no rank), Mandibulata (no rank), Arthropoda (phylum), Panarthropoda (no rank), Ecdysozoa (no rank), P…
60	A0A154PSS0	A0A154PSS0_DUFNO	Pyruvate kinase (EC 2.7.1.40)	Dufourea novaeangliae (Sweat bee)	58095	phosphorylation [GO:0016310]	ATP binding [GO:0005524]; kinase activity [GO:0016301]; magnesium ion binding [GO:0000287]; potassium ion binding [GO:0030955]; pyruvate kinase activity [GO:0004743]; phosphorylation [GO:0016310]	ATP binding [GO:0005524]; kinase activity [GO:0016301]; magnesium ion binding [GO:0000287]; potassium ion binding [GO:0030955]; pyruvate kinase activity [GO:0004743]		Pyruvate kinase family	Dufourea (genus), Rophitinae (subfamily), Halictidae (family), Apoidea (superfamily), Aculeata (infraorder), Apocrita (suborder), Hymenoptera (order), Endopterygota (cohort), Neoptera (infraclass), Pterygota (subclass), Dicondylia (no rank), Insecta (class), Hexapoda (subphylum), Pancrustacea (no rank), Mandibulata (no rank), Arthropoda (phylum), Panarthropoda (no rank), Ecdysozoa (no rank), Prot…
61	A0A7M7RB96	A0A7M7RB96_APIME	Aldose reductase	Apis mellifera (Honeybee)	36082		oxidoreductase activity [GO:0016491]	oxidoreductase activity [GO:0016491]			Apis (genus), Apini (tribe), Apinae (subfamily), Apidae (family), Apoidea (superfamily), Aculeata (infraorder), Apocrita (suborder), Hymenoptera (order), Endopterygota (cohort), Neoptera (infraclass), Pterygota (subclass), Dicondylia (no rank), Insecta (class), Hexapoda (subphylum), Pancrustacea (no rank), Mandibulata (no rank), Arthropoda (phylum), Panarthropoda (no rank), Ecdysozoa (no rank), P…
62	A0A154PIM3	A0A154PIM3_DUFNO	Twitchin	Dufourea novaeangliae (Sweat bee)	1078588	anatomical structure morphogenesis [GO:0009653]; cell differentiation [GO:0030154]; protein phosphorylation [GO:0006468]	ATP binding [GO:0005524]; protein kinase activity [GO:0004672]; anatomical structure morphogenesis [GO:0009653]; cell differentiation [GO:0030154]; protein phosphorylation [GO:0006468]	ATP binding [GO:0005524]; protein kinase activity [GO:0004672]		Protein kinase superfamily, CAMK Ser/Thr protein kinase family	Dufourea (genus), Rophitinae (subfamily), Halictidae (family), Apoidea (superfamily), Aculeata (infraorder), Apocrita (suborder), Hymenoptera (order), Endopterygota (cohort), Neoptera (infraclass), Pterygota (subclass), Dicondylia (no rank), Insecta (class), Hexapoda (subphylum), Pancrustacea (no rank), Mandibulata (no rank), Arthropoda (phylum), Panarthropoda (no rank), Ecdysozoa (no rank), Prot…
63	A0A7M7M151	A0A7M7M151_APIME	Glycogen debranching enzyme (EC 2.4.1.25) (EC 3.2.1.33) (Glycogen debrancher)	Apis mellifera (Honeybee)	237128	glycogen biosynthetic process [GO:0005978]; glycogen catabolic process [GO:0005980]	cytoplasm [GO:0005737]; membrane [GO:0016020]; 4-alpha-glucanotransferase activity [GO:0004134]; amylo-alpha-1,6-glucosidase activity [GO:0004135]; beta-maltose 4-alpha-glucanotransferase activity [GO:0102500]; glycogen biosynthetic process [GO:0005978]; glycogen catabolic process [GO:0005980]	4-alpha-glucanotransferase activity [GO:0004134]; amylo-alpha-1,6-glucosidase activity [GO:0004135]; beta-maltose 4-alpha-glucanotransferase activity [GO:0102500]		Glycogen debranching enzyme family	Apis (genus), Apini (tribe), Apinae (subfamily), Apidae (family), Apoidea (superfamily), Aculeata (infraorder), Apocrita (suborder), Hymenoptera (order), Endopterygota (cohort), Neoptera (infraclass), Pterygota (subclass), Dicondylia (no rank), Insecta (class), Hexapoda (subphylum), Pancrustacea (no rank), Mandibulata (no rank), Arthropoda (phylum), Panarthropoda (no rank), Ecdysozoa (no rank), P…
64	V9IJY9	V9IJY9_APICE	Stress-induced-phosphoprotein 1	Apis cerana (Indian honeybee)	61568		cytoplasm [GO:0005737]				Apis (genus), Apini (tribe), Apinae (subfamily), Apidae (family), Apoidea (superfamily), Aculeata (infraorder), Apocrita (suborder), Hymenoptera (order), Endopterygota (cohort), Neoptera (infraclass), Pterygota (subclass), Dicondylia (no rank), Insecta (class), Hexapoda (subphylum), Pancrustacea (no rank), Mandibulata (no rank), Arthropoda (phylum), Panarthropoda (no rank), Ecdysozoa (no rank), P…
65	A0A154PKM2	A0A154PKM2_DUFNO	Phosphotransferase (EC 2.7.1.-)	Dufourea novaeangliae (Sweat bee)	50607	glycolytic process [GO:0006096]; hexose metabolic process [GO:0019318]; intracellular glucose homeostasis [GO:0001678]	ATP binding [GO:0005524]; glucokinase activity [GO:0004340]; glucose binding [GO:0005536]; glycolytic process [GO:0006096]; hexose metabolic process [GO:0019318]; intracellular glucose homeostasis [GO:0001678]	ATP binding [GO:0005524]; glucokinase activity [GO:0004340]; glucose binding [GO:0005536]		Hexokinase family	Dufourea (genus), Rophitinae (subfamily), Halictidae (family), Apoidea (superfamily), Aculeata (infraorder), Apocrita (suborder), Hymenoptera (order), Endopterygota (cohort), Neoptera (infraclass), Pterygota (subclass), Dicondylia (no rank), Insecta (class), Hexapoda (subphylum), Pancrustacea (no rank), Mandibulata (no rank), Arthropoda (phylum), Panarthropoda (no rank), Ecdysozoa (no rank), Prot…
66	A0A154PH97	A0A154PH97_DUFNO	phosphoglucomutase (alpha-D-glucose-1,6-bisphosphate-dependent) (EC 5.4.2.2)	Dufourea novaeangliae (Sweat bee)	61506	carbohydrate metabolic process [GO:0005975]	magnesium ion binding [GO:0000287]; phosphoglucomutase activity [GO:0004614]; carbohydrate metabolic process [GO:0005975]	magnesium ion binding [GO:0000287]; phosphoglucomutase activity [GO:0004614]		Phosphohexose mutase family	Dufourea (genus), Rophitinae (subfamily), Halictidae (family), Apoidea (superfamily), Aculeata (infraorder), Apocrita (suborder), Hymenoptera (order), Endopterygota (cohort), Neoptera (infraclass), Pterygota (subclass), Dicondylia (no rank), Insecta (class), Hexapoda (subphylum), Pancrustacea (no rank), Mandibulata (no rank), Arthropoda (phylum), Panarthropoda (no rank), Ecdysozoa (no rank), Prot…
67	A0A7M7GX24	A0A7M7GX24_APIME	Transgelin	Apis mellifera (Honeybee)	20406					Calponin family	Apis (genus), Apini (tribe), Apinae (subfamily), Apidae (family), Apoidea (superfamily), Aculeata (infraorder), Apocrita (suborder), Hymenoptera (order), Endopterygota (cohort), Neoptera (infraclass), Pterygota (subclass), Dicondylia (no rank), Insecta (class), Hexapoda (subphylum), Pancrustacea (no rank), Mandibulata (no rank), Arthropoda (phylum), Panarthropoda (no rank), Ecdysozoa (no rank), P…
68	A0A833W2G7	A0A833W2G7_9HYME	Nidogen	Frieseomelitta varia	150944	cell-matrix adhesion [GO:0007160]	basement membrane [GO:0005604]; membrane [GO:0016020]; calcium ion binding [GO:0005509]; cell-matrix adhesion [GO:0007160]	calcium ion binding [GO:0005509]			Frieseomelitta (genus), Meliponini (tribe), Apinae (subfamily), Apidae (family), Apoidea (superfamily), Aculeata (infraorder), Apocrita (suborder), Hymenoptera (order), Endopterygota (cohort), Neoptera (infraclass), Pterygota (subclass), Dicondylia (no rank), Insecta (class), Hexapoda (subphylum), Pancrustacea (no rank), Mandibulata (no rank), Arthropoda (phylum), Panarthropoda (no rank), Ecdysoz…
69	A0A833S8G1	A0A833S8G1_9HYME	Aminopeptidase (EC 3.4.11.-)	Frieseomelitta varia	110339	proteolysis [GO:0006508]	aminopeptidase activity [GO:0004177]; metallopeptidase activity [GO:0008237]; zinc ion binding [GO:0008270]; proteolysis [GO:0006508]	aminopeptidase activity [GO:0004177]; metallopeptidase activity [GO:0008237]; zinc ion binding [GO:0008270]		Peptidase M1 family	Frieseomelitta (genus), Meliponini (tribe), Apinae (subfamily), Apidae (family), Apoidea (superfamily), Aculeata (infraorder), Apocrita (suborder), Hymenoptera (order), Endopterygota (cohort), Neoptera (infraclass), Pterygota (subclass), Dicondylia (no rank), Insecta (class), Hexapoda (subphylum), Pancrustacea (no rank), Mandibulata (no rank), Arthropoda (phylum), Panarthropoda (no rank), Ecdysoz…
70	A0A154PN63	A0A154PN63_DUFNO	Malate dehydrogenase (EC 1.1.1.37)	Dufourea novaeangliae (Sweat bee)	35959	malate metabolic process [GO:0006108]; tricarboxylic acid cycle [GO:0006099]	L-malate dehydrogenase activity [GO:0030060]; malate metabolic process [GO:0006108]; tricarboxylic acid cycle [GO:0006099]	L-malate dehydrogenase activity [GO:0030060]		LDH/MDH superfamily, MDH type 1 family	Dufourea (genus), Rophitinae (subfamily), Halictidae (family), Apoidea (superfamily), Aculeata (infraorder), Apocrita (suborder), Hymenoptera (order), Endopterygota (cohort), Neoptera (infraclass), Pterygota (subclass), Dicondylia (no rank), Insecta (class), Hexapoda (subphylum), Pancrustacea (no rank), Mandibulata (no rank), Arthropoda (phylum), Panarthropoda (no rank), Ecdysozoa (no rank), Prot…
71	A0A2A3EBK6	A0A2A3EBK6_APICC	LIM domain-binding protein	Apis cerana cerana (Oriental honeybee)	192869	proteolysis [GO:0006508]	metal ion binding [GO:0046872]; proteolysis [GO:0006508]	metal ion binding [GO:0046872]			Apis cerana (species), Apis (genus), Apini (tribe), Apinae (subfamily), Apidae (family), Apoidea (superfamily), Aculeata (infraorder), Apocrita (suborder), Hymenoptera (order), Endopterygota (cohort), Neoptera (infraclass), Pterygota (subclass), Dicondylia (no rank), Insecta (class), Hexapoda (subphylum), Pancrustacea (no rank), Mandibulata (no rank), Arthropoda (phylum), Panarthropoda (no rank),…
72	A0A7M7TFB5	A0A7M7TFB5_APIME	Muscle LIM protein Mlp84B isoform X2	Apis mellifera (Honeybee)	53221		metal ion binding [GO:0046872]	metal ion binding [GO:0046872]			Apis (genus), Apini (tribe), Apinae (subfamily), Apidae (family), Apoidea (superfamily), Aculeata (infraorder), Apocrita (suborder), Hymenoptera (order), Endopterygota (cohort), Neoptera (infraclass), Pterygota (subclass), Dicondylia (no rank), Insecta (class), Hexapoda (subphylum), Pancrustacea (no rank), Mandibulata (no rank), Arthropoda (phylum), Panarthropoda (no rank), Ecdysozoa (no rank), P…
73	A0A833W0Z5	A0A833W0Z5_9HYME	H(+)-transporting two-sector ATPase (EC 7.1.2.2)	Frieseomelitta varia	68439	ATP metabolic process [GO:0046034]	proton-transporting V-type ATPase, V1 domain [GO:0033180]; ATP binding [GO:0005524]; proton-transporting ATPase activity, rotational mechanism [GO:0046961]; ATP metabolic process [GO:0046034]	ATP binding [GO:0005524]; proton-transporting ATPase activity, rotational mechanism [GO:0046961]		ATPase alpha/beta chains family	Frieseomelitta (genus), Meliponini (tribe), Apinae (subfamily), Apidae (family), Apoidea (superfamily), Aculeata (infraorder), Apocrita (suborder), Hymenoptera (order), Endopterygota (cohort), Neoptera (infraclass), Pterygota (subclass), Dicondylia (no rank), Insecta (class), Hexapoda (subphylum), Pancrustacea (no rank), Mandibulata (no rank), Arthropoda (phylum), Panarthropoda (no rank), Ecdysoz…
74	A0A833S1K4	A0A833S1K4_9HYME	Malic enzyme	Frieseomelitta varia	73639		malate dehydrogenase (decarboxylating) (NAD+) activity [GO:0004471]; metal ion binding [GO:0046872]; NAD binding [GO:0051287]	malate dehydrogenase (decarboxylating) (NAD+) activity [GO:0004471]; metal ion binding [GO:0046872]; NAD binding [GO:0051287]		Malic enzymes family	Frieseomelitta (genus), Meliponini (tribe), Apinae (subfamily), Apidae (family), Apoidea (superfamily), Aculeata (infraorder), Apocrita (suborder), Hymenoptera (order), Endopterygota (cohort), Neoptera (infraclass), Pterygota (subclass), Dicondylia (no rank), Insecta (class), Hexapoda (subphylum), Pancrustacea (no rank), Mandibulata (no rank), Arthropoda (phylum), Panarthropoda (no rank), Ecdysoz…
75	A0A833VWR2	A0A833VWR2_9HYME	ATP synthase subunit beta (EC 7.1.2.2)	Frieseomelitta varia	55142		proton-transporting ATP synthase complex, catalytic core F(1) [GO:0045261]; ATP binding [GO:0005524]; proton-transporting ATP synthase activity, rotational mechanism [GO:0046933]	ATP binding [GO:0005524]; proton-transporting ATP synthase activity, rotational mechanism [GO:0046933]		ATPase alpha/beta chains family	Frieseomelitta (genus), Meliponini (tribe), Apinae (subfamily), Apidae (family), Apoidea (superfamily), Aculeata (infraorder), Apocrita (suborder), Hymenoptera (order), Endopterygota (cohort), Neoptera (infraclass), Pterygota (subclass), Dicondylia (no rank), Insecta (class), Hexapoda (subphylum), Pancrustacea (no rank), Mandibulata (no rank), Arthropoda (phylum), Panarthropoda (no rank), Ecdysoz…
76	A0A833WFE3	A0A833WFE3_9HYME	Calcium-transporting ATPase (EC 7.2.2.10)	Frieseomelitta varia	104360		sarcoplasmic reticulum membrane [GO:0033017]; ATP binding [GO:0005524]; ATP hydrolysis activity [GO:0016887]; P-type calcium transporter activity [GO:0005388]	ATP binding [GO:0005524]; ATP hydrolysis activity [GO:0016887]; P-type calcium transporter activity [GO:0005388]		Cation transport ATPase (P-type) (TC 3.A.3) family	Frieseomelitta (genus), Meliponini (tribe), Apinae (subfamily), Apidae (family), Apoidea (superfamily), Aculeata (infraorder), Apocrita (suborder), Hymenoptera (order), Endopterygota (cohort), Neoptera (infraclass), Pterygota (subclass), Dicondylia (no rank), Insecta (class), Hexapoda (subphylum), Pancrustacea (no rank), Mandibulata (no rank), Arthropoda (phylum), Panarthropoda (no rank), Ecdysoz…
77	A0A154P1Q6	A0A154P1Q6_DUFNO	Elongation factor 1-alpha	Dufourea novaeangliae (Sweat bee)	50278		cytoplasm [GO:0005737]; GTP binding [GO:0005525]; GTPase activity [GO:0003924]; translation elongation factor activity [GO:0003746]	GTP binding [GO:0005525]; GTPase activity [GO:0003924]; translation elongation factor activity [GO:0003746]		TRAFAC class translation factor GTPase superfamily, Classic translation factor GTPase family, EF-Tu/EF-1A subfamily	Dufourea (genus), Rophitinae (subfamily), Halictidae (family), Apoidea (superfamily), Aculeata (infraorder), Apocrita (suborder), Hymenoptera (order), Endopterygota (cohort), Neoptera (infraclass), Pterygota (subclass), Dicondylia (no rank), Insecta (class), Hexapoda (subphylum), Pancrustacea (no rank), Mandibulata (no rank), Arthropoda (phylum), Panarthropoda (no rank), Ecdysozoa (no rank), Prot…
78	V9IG73	V9IG73_APICE	Actin, indirect flight muscle	Apis cerana (Indian honeybee)	41785					Actin family	Apis (genus), Apini (tribe), Apinae (subfamily), Apidae (family), Apoidea (superfamily), Aculeata (infraorder), Apocrita (suborder), Hymenoptera (order), Endopterygota (cohort), Neoptera (infraclass), Pterygota (subclass), Dicondylia (no rank), Insecta (class), Hexapoda (subphylum), Pancrustacea (no rank), Mandibulata (no rank), Arthropoda (phylum), Panarthropoda (no rank), Ecdysozoa (no rank), P…
79	A0A7M7GV60	A0A7M7GV60_APIME	Troponin C type I isoform X3	Apis mellifera (Honeybee)	17411		calcium ion binding [GO:0005509]	calcium ion binding [GO:0005509]			Apis (genus), Apini (tribe), Apinae (subfamily), Apidae (family), Apoidea (superfamily), Aculeata (infraorder), Apocrita (suborder), Hymenoptera (order), Endopterygota (cohort), Neoptera (infraclass), Pterygota (subclass), Dicondylia (no rank), Insecta (class), Hexapoda (subphylum), Pancrustacea (no rank), Mandibulata (no rank), Arthropoda (phylum), Panarthropoda (no rank), Ecdysozoa (no rank), P…
80	A0A7M7SRL2	A0A7M7SRL2_APIME	Talin-1 isoform X1	Apis mellifera (Honeybee)	282916	animal organ morphogenesis [GO:0009887]; cell adhesion [GO:0007155]; neuron differentiation [GO:0030182]	cytoplasm [GO:0005737]; cytoskeleton [GO:0005856]; focal adhesion [GO:0005925]; ruffle [GO:0001726]; actin filament binding [GO:0051015]; structural constituent of cytoskeleton [GO:0005200]; animal organ morphogenesis [GO:0009887]; cell adhesion [GO:0007155]; neuron differentiation [GO:0030182]	actin filament binding [GO:0051015]; structural constituent of cytoskeleton [GO:0005200]			Apis (genus), Apini (tribe), Apinae (subfamily), Apidae (family), Apoidea (superfamily), Aculeata (infraorder), Apocrita (suborder), Hymenoptera (order), Endopterygota (cohort), Neoptera (infraclass), Pterygota (subclass), Dicondylia (no rank), Insecta (class), Hexapoda (subphylum), Pancrustacea (no rank), Mandibulata (no rank), Arthropoda (phylum), Panarthropoda (no rank), Ecdysozoa (no rank), P…
81	V9IF54	V9IF54_APICE	Myosin light chain alkali	Apis cerana (Indian honeybee)	16982		calcium ion binding [GO:0005509]	calcium ion binding [GO:0005509]			Apis (genus), Apini (tribe), Apinae (subfamily), Apidae (family), Apoidea (superfamily), Aculeata (infraorder), Apocrita (suborder), Hymenoptera (order), Endopterygota (cohort), Neoptera (infraclass), Pterygota (subclass), Dicondylia (no rank), Insecta (class), Hexapoda (subphylum), Pancrustacea (no rank), Mandibulata (no rank), Arthropoda (phylum), Panarthropoda (no rank), Ecdysozoa (no rank), P…
82	V9IL23	V9IL23_APICE	peptidylprolyl isomerase (EC 5.2.1.8)	Apis cerana (Indian honeybee)	11764		peptidyl-prolyl cis-trans isomerase activity [GO:0003755]	peptidyl-prolyl cis-trans isomerase activity [GO:0003755]			Apis (genus), Apini (tribe), Apinae (subfamily), Apidae (family), Apoidea (superfamily), Aculeata (infraorder), Apocrita (suborder), Hymenoptera (order), Endopterygota (cohort), Neoptera (infraclass), Pterygota (subclass), Dicondylia (no rank), Insecta (class), Hexapoda (subphylum), Pancrustacea (no rank), Mandibulata (no rank), Arthropoda (phylum), Panarthropoda (no rank), Ecdysozoa (no rank), P…
83	A0A833W8Q7	A0A833W8Q7_9HYME	6-phosphogluconate dehydrogenase, decarboxylating (EC 1.1.1.44)	Frieseomelitta varia	54312	D-gluconate metabolic process [GO:0019521]; pentose-phosphate shunt [GO:0006098]	NADP binding [GO:0050661]; phosphogluconate dehydrogenase (decarboxylating) activity [GO:0004616]; D-gluconate metabolic process [GO:0019521]; pentose-phosphate shunt [GO:0006098]	NADP binding [GO:0050661]; phosphogluconate dehydrogenase (decarboxylating) activity [GO:0004616]		6-phosphogluconate dehydrogenase family	Frieseomelitta (genus), Meliponini (tribe), Apinae (subfamily), Apidae (family), Apoidea (superfamily), Aculeata (infraorder), Apocrita (suborder), Hymenoptera (order), Endopterygota (cohort), Neoptera (infraclass), Pterygota (subclass), Dicondylia (no rank), Insecta (class), Hexapoda (subphylum), Pancrustacea (no rank), Mandibulata (no rank), Arthropoda (phylum), Panarthropoda (no rank), Ecdysoz…
84	R9QKY2	R9QKY2_BOMHU	Glucose-6-phosphate isomerase (EC 5.3.1.9)	Bombus humilis (Brown-banded carder bee)	50474	carbohydrate derivative metabolic process [GO:1901135]; gluconeogenesis [GO:0006094]; glycolytic process [GO:0006096]	carbohydrate derivative binding [GO:0097367]; glucose-6-phosphate isomerase activity [GO:0004347]; carbohydrate derivative metabolic process [GO:1901135]; gluconeogenesis [GO:0006094]; glycolytic process [GO:0006096]	carbohydrate derivative binding [GO:0097367]; glucose-6-phosphate isomerase activity [GO:0004347]	23750269	GPI family	Thoracobombus (subgenus), Bombus (genus), Bombini (tribe), Apinae (subfamily), Apidae (family), Apoidea (superfamily), Aculeata (infraorder), Apocrita (suborder), Hymenoptera (order), Endopterygota (cohort), Neoptera (infraclass), Pterygota (subclass), Dicondylia (no rank), Insecta (class), Hexapoda (subphylum), Pancrustacea (no rank), Mandibulata (no rank), Arthropoda (phylum), Panarthropoda (no…
85	A0A154P1T4	A0A154P1T4_DUFNO	oxoglutarate dehydrogenase (succinyl-transferring) (EC 1.2.4.2)	Dufourea novaeangliae (Sweat bee)	115489	tricarboxylic acid cycle [GO:0006099]	oxoglutarate dehydrogenase (succinyl-transferring) activity [GO:0004591]; thiamine pyrophosphate binding [GO:0030976]; tricarboxylic acid cycle [GO:0006099]	oxoglutarate dehydrogenase (succinyl-transferring) activity [GO:0004591]; thiamine pyrophosphate binding [GO:0030976]		Alpha-ketoglutarate dehydrogenase family	Dufourea (genus), Rophitinae (subfamily), Halictidae (family), Apoidea (superfamily), Aculeata (infraorder), Apocrita (suborder), Hymenoptera (order), Endopterygota (cohort), Neoptera (infraclass), Pterygota (subclass), Dicondylia (no rank), Insecta (class), Hexapoda (subphylum), Pancrustacea (no rank), Mandibulata (no rank), Arthropoda (phylum), Panarthropoda (no rank), Ecdysozoa (no rank), Prot…
86	A0A833SBT7	A0A833SBT7_9HYME	Succinate--CoA ligase [ADP-forming] subunit beta, mitochondrial (EC 6.2.1.5) (Succinyl-CoA synthetase beta chain) (SCS-beta)	Frieseomelitta varia	57120	tricarboxylic acid cycle [GO:0006099]	mitochondrion [GO:0005739]; ATP binding [GO:0005524]; magnesium ion binding [GO:0000287]; succinate-CoA ligase (ADP-forming) activity [GO:0004775]; tricarboxylic acid cycle [GO:0006099]	ATP binding [GO:0005524]; magnesium ion binding [GO:0000287]; succinate-CoA ligase (ADP-forming) activity [GO:0004775]		Succinate/malate CoA ligase beta subunit family	Frieseomelitta (genus), Meliponini (tribe), Apinae (subfamily), Apidae (family), Apoidea (superfamily), Aculeata (infraorder), Apocrita (suborder), Hymenoptera (order), Endopterygota (cohort), Neoptera (infraclass), Pterygota (subclass), Dicondylia (no rank), Insecta (class), Hexapoda (subphylum), Pancrustacea (no rank), Mandibulata (no rank), Arthropoda (phylum), Panarthropoda (no rank), Ecdysoz…
87	V9IFD6	V9IFD6_APICE	ATP synthase subunit alpha	Apis cerana (Indian honeybee)	59526		proton-transporting ATP synthase complex, catalytic core F(1) [GO:0045261]; ATP binding [GO:0005524]; proton-transporting ATP synthase activity, rotational mechanism [GO:0046933]	ATP binding [GO:0005524]; proton-transporting ATP synthase activity, rotational mechanism [GO:0046933]		ATPase alpha/beta chains family	Apis (genus), Apini (tribe), Apinae (subfamily), Apidae (family), Apoidea (superfamily), Aculeata (infraorder), Apocrita (suborder), Hymenoptera (order), Endopterygota (cohort), Neoptera (infraclass), Pterygota (subclass), Dicondylia (no rank), Insecta (class), Hexapoda (subphylum), Pancrustacea (no rank), Mandibulata (no rank), Arthropoda (phylum), Panarthropoda (no rank), Ecdysozoa (no rank), P…
88	Q49P72	Q49P72_ECOLX	Outer membrane protein A (Outer membrane porin A)	Escherichia coli	37437	monoatomic ion transmembrane transport [GO:0034220]	cell outer membrane [GO:0009279]; pore complex [GO:0046930]; porin activity [GO:0015288]; monoatomic ion transmembrane transport [GO:0034220]	porin activity [GO:0015288]	16980421; 30286803; 31477907	Outer membrane OOP (TC 1.B.6) superfamily, OmpA family	Escherichia (genus), Enterobacteriaceae (family), Enterobacterales (order), Gammaproteobacteria (class), Pseudomonadota (phylum), Bacteria (superkingdom), cellular organisms (no rank)
89	A0A8C6NUW2	A0A8C6NUW2_NOTFU	Serine/threonine-protein kinase receptor (EC 2.7.11.30)	Nothobranchius furzeri (Turquoise killifish)	54094	protein phosphorylation [GO:0006468]	membrane [GO:0016020]; ATP binding [GO:0005524]; metal ion binding [GO:0046872]; transmembrane receptor protein serine/threonine kinase activity [GO:0004675]; protein phosphorylation [GO:0006468]	ATP binding [GO:0005524]; metal ion binding [GO:0046872]; transmembrane receptor protein serine/threonine kinase activity [GO:0004675]		Protein kinase superfamily, TKL Ser/Thr protein kinase family, TGFB receptor subfamily	Nothobranchius (genus), Nothobranchiidae (family), Aplocheiloidei (suborder), Cyprinodontiformes (order), Atherinomorphae (superorder), Ovalentaria (no rank), Percomorphaceae (no rank), Euacanthomorphacea (no rank), Acanthomorphata (no rank), Ctenosquamata (no rank), Eurypterygia (no rank), Neoteleostei (no rank), Euteleosteomorpha (cohort), Clupeocephala (no rank), Osteoglossocephalai (no rank),…
90	A0A2I9LNP4	A0A2I9LNP4_9SCOR	phosphopyruvate hydratase (EC 4.2.1.11) (2-phospho-D-glycerate hydro-lyase)	Centruroides hentzi	46517	glycolytic process [GO:0006096]	phosphopyruvate hydratase complex [GO:0000015]; magnesium ion binding [GO:0000287]; phosphopyruvate hydratase activity [GO:0004634]; glycolytic process [GO:0006096]	magnesium ion binding [GO:0000287]; phosphopyruvate hydratase activity [GO:0004634]	29248469	Enolase family	Centruroides (genus), Buthidae (family), Buthoidea (superfamily), Buthida (parvorder), Scorpiones (order), Arachnida (class), Chelicerata (subphylum), Arthropoda (phylum), Panarthropoda (no rank), Ecdysozoa (no rank), Protostomia (no rank), Bilateria (no rank), Eumetazoa (no rank), Metazoa (kingdom), Opisthokonta (no rank), Eukaryota (superkingdom), cellular organisms (no rank)
91	A0A1V9XXZ1	A0A1V9XXZ1_9ACAR	Histone H4	Tropilaelaps mercedesae	28105		nucleosome [GO:0000786]; nucleus [GO:0005634]; DNA binding [GO:0003677]; protein heterodimerization activity [GO:0046982]; structural constituent of chromatin [GO:0030527]	DNA binding [GO:0003677]; protein heterodimerization activity [GO:0046982]; structural constituent of chromatin [GO:0030527]	28327890	Histone H2B family; Histone H4 family	Tropilaelaps (genus), Laelapidae (family), Dermanyssoidea (superfamily), Gamasina (infraorder), Monogynaspida (suborder), Mesostigmata (order), Parasitiformes (superorder), Acari (subclass), Arachnida (class), Chelicerata (subphylum), Arthropoda (phylum), Panarthropoda (no rank), Ecdysozoa (no rank), Protostomia (no rank), Bilateria (no rank), Eumetazoa (no rank), Metazoa (kingdom), Opisthokonta …
92	Q8B3M2	Q8B3M2_9VIRU	Genome polyprotein	Deformed wing virus	328477	DNA-templated transcription [GO:0006351]; proteolysis [GO:0006508]; RNA-protein covalent cross-linking [GO:0018144]; viral RNA genome replication [GO:0039694]	cytoplasm [GO:0005737]; host cell cytoplasm [GO:0030430]; host cell membrane [GO:0033644]; membrane [GO:0016020]; viral capsid [GO:0019028]; ATP binding [GO:0005524]; cysteine-type endopeptidase activity [GO:0004197]; RNA binding [GO:0003723]; RNA helicase activity [GO:0003724]; RNA-dependent RNA polymerase activity [GO:0003968]; structural molecule activity [GO:0005198]; DNA-templated transcript…	ATP binding [GO:0005524]; cysteine-type endopeptidase activity [GO:0004197]; RNA binding [GO:0003723]; RNA helicase activity [GO:0003724]; RNA-dependent RNA polymerase activity [GO:0003968]; structural molecule activity [GO:0005198]	16641291; 28270616		Iflavirus (genus), Iflaviridae (family), Picornavirales (order), Pisoniviricetes (class), Pisuviricota (phylum), Orthornavirae (kingdom), Riboviria (no rank), Viruses (superkingdom)
93	A0A1V9X4H1	A0A1V9X4H1_9ACAR	vesicle-fusing ATPase (EC 3.6.4.6)	Tropilaelaps mercedesae	90370		ATP binding [GO:0005524]; ATP hydrolysis activity [GO:0016887]	ATP binding [GO:0005524]; ATP hydrolysis activity [GO:0016887]	28327890		Tropilaelaps (genus), Laelapidae (family), Dermanyssoidea (superfamily), Gamasina (infraorder), Monogynaspida (suborder), Mesostigmata (order), Parasitiformes (superorder), Acari (subclass), Arachnida (class), Chelicerata (subphylum), Arthropoda (phylum), Panarthropoda (no rank), Ecdysozoa (no rank), Protostomia (no rank), Bilateria (no rank), Eumetazoa (no rank), Metazoa (kingdom), Opisthokonta …
94	T0L0J8	T0L0J8_9MICR	Pyrimidine 5-nucleotidase	Nosema apis BRL 01	25379				23829473		Nosema apis (species), Nosema (genus), Nosematidae (family), Apansporoblastina (suborder), Microsporidia (phylum), Fungi incertae sedis (no rank), Fungi (kingdom), Opisthokonta (no rank), Eukaryota (superkingdom), cellular organisms (no rank)
95	E2QJ06	E2QJ06_ECOLX	Elongation factor Tu (EF-Tu)	Escherichia coli	43314		cytoplasm [GO:0005737]; GTP binding [GO:0005525]; GTPase activity [GO:0003924]; guanosine tetraphosphate binding [GO:0097216]; translation elongation factor activity [GO:0003746]	GTP binding [GO:0005525]; GTPase activity [GO:0003924]; guanosine tetraphosphate binding [GO:0097216]; translation elongation factor activity [GO:0003746]	29437920; 32739475; 34609275	TRAFAC class translation factor GTPase superfamily, Classic translation factor GTPase family, EF-Tu/EF-1A subfamily	Escherichia (genus), Enterobacteriaceae (family), Enterobacterales (order), Gammaproteobacteria (class), Pseudomonadota (phylum), Bacteria (superkingdom), cellular organisms (no rank)
96	A0A821Q934	A0A821Q934_9NEOB	Pentraxin family member	Ranitomeya imitator (mimic poison frog)	25502		extracellular region [GO:0005576]; metal ion binding [GO:0046872]	metal ion binding [GO:0046872]		Pentraxin family	Ranitomeya (genus), Dendrobatinae (subfamily), Dendrobatidae (family), Hyloidea (superfamily), Neobatrachia (suborder), Anura (order), Batrachia (superorder), Amphibia (class), Tetrapoda (no rank), Dipnotetrapodomorpha (no rank), Sarcopterygii (superclass), Euteleostomi (no rank), Teleostomi (no rank), Gnathostomata (no rank), Vertebrata (no rank), Craniata (subphylum), Chordata (phylum), Deutero…
97	W8TPS1	W8TPS1_ECOLX	Isocitrate dehydrogenase [NADP] (EC 1.1.1.42)	Escherichia coli	45785	glyoxylate cycle [GO:0006097]; tricarboxylic acid cycle [GO:0006099]	isocitrate dehydrogenase (NADP+) activity [GO:0004450]; magnesium ion binding [GO:0000287]; NAD binding [GO:0051287]; glyoxylate cycle [GO:0006097]; tricarboxylic acid cycle [GO:0006099]	isocitrate dehydrogenase (NADP+) activity [GO:0004450]; magnesium ion binding [GO:0000287]; NAD binding [GO:0051287]	30286803; 29437920; 31477907; 32739475		Escherichia (genus), Enterobacteriaceae (family), Enterobacterales (order), Gammaproteobacteria (class), Pseudomonadota (phylum), Bacteria (superkingdom), cellular organisms (no rank)
98	A0A821PRI4	A0A821PRI4_9NEOB	(mimic poison frog) hypothetical protein	Ranitomeya imitator (mimic poison frog)	22037		oxidoreductase activity, acting on the aldehyde or oxo group of donors, NAD or NADP as acceptor [GO:0016620]	oxidoreductase activity, acting on the aldehyde or oxo group of donors, NAD or NADP as acceptor [GO:0016620]		Glyceraldehyde-3-phosphate dehydrogenase family	Ranitomeya (genus), Dendrobatinae (subfamily), Dendrobatidae (family), Hyloidea (superfamily), Neobatrachia (suborder), Anura (order), Batrachia (superorder), Amphibia (class), Tetrapoda (no rank), Dipnotetrapodomorpha (no rank), Sarcopterygii (superclass), Euteleostomi (no rank), Teleostomi (no rank), Gnathostomata (no rank), Vertebrata (no rank), Craniata (subphylum), Chordata (phylum), Deutero…
99	A0A821C5G8	A0A821C5G8_9NEOB	Vacuolar proton pump subunit B (V-ATPase subunit B) (Vacuolar proton pump subunit B)	Ranitomeya imitator (mimic poison frog)	56551	ATP metabolic process [GO:0046034]	apical plasma membrane [GO:0016324]; proton-transporting V-type ATPase, V1 domain [GO:0033180]; ATP binding [GO:0005524]; proton-transporting ATPase activity, rotational mechanism [GO:0046961]; ATP metabolic process [GO:0046034]	ATP binding [GO:0005524]; proton-transporting ATPase activity, rotational mechanism [GO:0046961]		ATPase alpha/beta chains family	Ranitomeya (genus), Dendrobatinae (subfamily), Dendrobatidae (family), Hyloidea (superfamily), Neobatrachia (suborder), Anura (order), Batrachia (superorder), Amphibia (class), Tetrapoda (no rank), Dipnotetrapodomorpha (no rank), Sarcopterygii (superclass), Euteleostomi (no rank), Teleostomi (no rank), Gnathostomata (no rank), Vertebrata (no rank), Craniata (subphylum), Chordata (phylum), Deutero…
100	A0A821LMA2	A0A821LMA2_9NEOB	(mimic poison frog) hypothetical protein	Ranitomeya imitator (mimic poison frog)	55876		extracellular space [GO:0005615]				Ranitomeya (genus), Dendrobatinae (subfamily), Dendrobatidae (family), Hyloidea (superfamily), Neobatrachia (suborder), Anura (order), Batrachia (superorder), Amphibia (class), Tetrapoda (no rank), Dipnotetrapodomorpha (no rank), Sarcopterygii (superclass), Euteleostomi (no rank), Teleostomi (no rank), Gnathostomata (no rank), Vertebrata (no rank), Craniata (subphylum), Chordata (phylum), Deutero…
101	A0A821APD0	A0A821APD0_9NEOB	(mimic poison frog) hypothetical protein	Ranitomeya imitator (mimic poison frog)	54722		extracellular space [GO:0005615]; serine-type endopeptidase inhibitor activity [GO:0004867]	serine-type endopeptidase inhibitor activity [GO:0004867]		Serpin family	Ranitomeya (genus), Dendrobatinae (subfamily), Dendrobatidae (family), Hyloidea (superfamily), Neobatrachia (suborder), Anura (order), Batrachia (superorder), Amphibia (class), Tetrapoda (no rank), Dipnotetrapodomorpha (no rank), Sarcopterygii (superclass), Euteleostomi (no rank), Teleostomi (no rank), Gnathostomata (no rank), Vertebrata (no rank), Craniata (subphylum), Chordata (phylum), Deutero…
102	A0A821XWY2	A0A821XWY2_9NEOB	(mimic poison frog) hypothetical protein	Ranitomeya imitator (mimic poison frog)	46756		intermediate filament [GO:0005882]; structural molecule activity [GO:0005198]	structural molecule activity [GO:0005198]		Intermediate filament family	Ranitomeya (genus), Dendrobatinae (subfamily), Dendrobatidae (family), Hyloidea (superfamily), Neobatrachia (suborder), Anura (order), Batrachia (superorder), Amphibia (class), Tetrapoda (no rank), Dipnotetrapodomorpha (no rank), Sarcopterygii (superclass), Euteleostomi (no rank), Teleostomi (no rank), Gnathostomata (no rank), Vertebrata (no rank), Craniata (subphylum), Chordata (phylum), Deutero…
103	A0A821Z0Z9	A0A821Z0Z9_9NEOB	(mimic poison frog) hypothetical protein	Ranitomeya imitator (mimic poison frog)	60687		keratin filament [GO:0045095]			Intermediate filament family	Ranitomeya (genus), Dendrobatinae (subfamily), Dendrobatidae (family), Hyloidea (superfamily), Neobatrachia (suborder), Anura (order), Batrachia (superorder), Amphibia (class), Tetrapoda (no rank), Dipnotetrapodomorpha (no rank), Sarcopterygii (superclass), Euteleostomi (no rank), Teleostomi (no rank), Gnathostomata (no rank), Vertebrata (no rank), Craniata (subphylum), Chordata (phylum), Deutero…
104	T1FY51	T1FY51_HELRO	Uncharacterized protein	Helobdella robusta (Californian leech)	228129	ammonia assimilation cycle [GO:0019676]; glutamate biosynthetic process [GO:0006537]; L-glutamate biosynthetic process [GO:0097054]	3 iron, 4 sulfur cluster binding [GO:0051538]; flavin adenine dinucleotide binding [GO:0050660]; FMN binding [GO:0010181]; glutamate synthase (NADH) activity [GO:0016040]; glutamate synthase (NADPH) activity [GO:0004355]; iron ion binding [GO:0005506]; toxin activity [GO:0090729]; ammonia assimilation cycle [GO:0019676]; glutamate biosynthetic process [GO:0006537]; L-glutamate biosynthetic proces…	3 iron, 4 sulfur cluster binding [GO:0051538]; flavin adenine dinucleotide binding [GO:0050660]; FMN binding [GO:0010181]; glutamate synthase (NADH) activity [GO:0016040]; glutamate synthase (NADPH) activity [GO:0004355]; iron ion binding [GO:0005506]; toxin activity [GO:0090729]	23254933	Glutamate synthase family	Helobdella (genus), Glossiphoniidae (family), Rhynchobdellida (order), Hirudinea (subclass), Clitellata (class), Annelida (phylum), Lophotrochozoa (no rank), Spiralia (no rank), Protostomia (no rank), Bilateria (no rank), Eumetazoa (no rank), Metazoa (kingdom), Opisthokonta (no rank), Eukaryota (superkingdom), cellular organisms (no rank)
105	A0A6L3RX62	A0A6L3RX62_CROSK	Cysteine/glutathione ABC transporter ATP-binding protein/permease CydC	Cronobacter sakazakii (Enterobacter sakazakii)	62344	cell redox homeostasis [GO:0045454]; glutathione transmembrane transport [GO:0034775]	membrane [GO:0016020]; ABC-type transporter activity [GO:0140359]; ATP binding [GO:0005524]; ATP hydrolysis activity [GO:0016887]; cell redox homeostasis [GO:0045454]; glutathione transmembrane transport [GO:0034775]	ABC-type transporter activity [GO:0140359]; ATP binding [GO:0005524]; ATP hydrolysis activity [GO:0016887]			Cronobacter (genus), Enterobacteriaceae (family), Enterobacterales (order), Gammaproteobacteria (class), Pseudomonadota (phylum), Bacteria (superkingdom), cellular organisms (no rank)
106	A7XZV8	A7XZV8_SIGCA	Heat shock protein 70	Siganus canaliculatus (White-spotted spinefoot) (Chaetodon canaliculatus)	24485		ATP binding [GO:0005524]; ATP-dependent protein folding chaperone [GO:0140662]	ATP binding [GO:0005524]; ATP-dependent protein folding chaperone [GO:0140662]		Heat shock protein 70 family	Siganus (genus), Siganidae (family), Eupercaria incertae sedis (no rank), Eupercaria (no rank), Percomorphaceae (no rank), Euacanthomorphacea (no rank), Acanthomorphata (no rank), Ctenosquamata (no rank), Eurypterygia (no rank), Neoteleostei (no rank), Euteleosteomorpha (cohort), Clupeocephala (no rank), Osteoglossocephalai (no rank), Teleostei (infraclass), Neopterygii (subclass), Actinopteri (c…
107	A0A089XL96	A0A089XL96_9LACT	Glyceraldehyde-3-phosphate dehydrogenase	Lactococcus lactis	35819	glucose metabolic process [GO:0006006]	NAD binding [GO:0051287]; NADP binding [GO:0050661]; oxidoreductase activity, acting on the aldehyde or oxo group of donors, NAD or NADP as acceptor [GO:0016620]; glucose metabolic process [GO:0006006]	NAD binding [GO:0051287]; NADP binding [GO:0050661]; oxidoreductase activity, acting on the aldehyde or oxo group of donors, NAD or NADP as acceptor [GO:0016620]		Glyceraldehyde-3-phosphate dehydrogenase family	Lactococcus (genus), Streptococcaceae (family), Lactobacillales (order), Bacilli (class), Bacillota (phylum), Terrabacteria group (no rank), Bacteria (superkingdom), cellular organisms (no rank)
108	A0A822IFE0	A0A822IFE0_9NEOB	H(+)-transporting two-sector ATPase (EC 7.1.2.2)	Ranitomeya imitator (mimic poison frog)	37469	ATP metabolic process [GO:0046034]	ATP binding [GO:0005524]; proton-transporting ATPase activity, rotational mechanism [GO:0046961]; ATP metabolic process [GO:0046034]	ATP binding [GO:0005524]; proton-transporting ATPase activity, rotational mechanism [GO:0046961]		ATPase alpha/beta chains family	Ranitomeya (genus), Dendrobatinae (subfamily), Dendrobatidae (family), Hyloidea (superfamily), Neobatrachia (suborder), Anura (order), Batrachia (superorder), Amphibia (class), Tetrapoda (no rank), Dipnotetrapodomorpha (no rank), Sarcopterygii (superclass), Euteleostomi (no rank), Teleostomi (no rank), Gnathostomata (no rank), Vertebrata (no rank), Craniata (subphylum), Chordata (phylum), Deutero…
109	A0A822I5U0	A0A822I5U0_9NEOB	(mimic poison frog) hypothetical protein	Ranitomeya imitator (mimic poison frog)	67528		ATP binding [GO:0005524]; ATP-dependent protein folding chaperone [GO:0140662]	ATP binding [GO:0005524]; ATP-dependent protein folding chaperone [GO:0140662]		Heat shock protein 70 family	Ranitomeya (genus), Dendrobatinae (subfamily), Dendrobatidae (family), Hyloidea (superfamily), Neobatrachia (suborder), Anura (order), Batrachia (superorder), Amphibia (class), Tetrapoda (no rank), Dipnotetrapodomorpha (no rank), Sarcopterygii (superclass), Euteleostomi (no rank), Teleostomi (no rank), Gnathostomata (no rank), Vertebrata (no rank), Craniata (subphylum), Chordata (phylum), Deutero…
110	A0A7M7L2X0	A0A7M7L2X0_APIME	Filamin-like isoform X2	Apis mellifera (Honeybee)	263165	actin cytoskeleton organization [GO:0030036]	intracellular non-membrane-bounded organelle [GO:0043232]; actin filament binding [GO:0051015]; actin cytoskeleton organization [GO:0030036]	actin filament binding [GO:0051015]		Filamin family	Apis (genus), Apini (tribe), Apinae (subfamily), Apidae (family), Apoidea (superfamily), Aculeata (infraorder), Apocrita (suborder), Hymenoptera (order), Endopterygota (cohort), Neoptera (infraclass), Pterygota (subclass), Dicondylia (no rank), Insecta (class), Hexapoda (subphylum), Pancrustacea (no rank), Mandibulata (no rank), Arthropoda (phylum), Panarthropoda (no rank), Ecdysozoa (no rank), P…
111	A0A833SBP4	A0A833SBP4_9HYME	Glycoside hydrolase family 31 N-terminal domain-containing protein	Frieseomelitta varia	106341	carbohydrate metabolic process [GO:0005975]	alpha-glucosidase activity [GO:0090599]; carbohydrate binding [GO:0030246]; carbohydrate metabolic process [GO:0005975]	alpha-glucosidase activity [GO:0090599]; carbohydrate binding [GO:0030246]		Glycosyl hydrolase 31 family	Frieseomelitta (genus), Meliponini (tribe), Apinae (subfamily), Apidae (family), Apoidea (superfamily), Aculeata (infraorder), Apocrita (suborder), Hymenoptera (order), Endopterygota (cohort), Neoptera (infraclass), Pterygota (subclass), Dicondylia (no rank), Insecta (class), Hexapoda (subphylum), Pancrustacea (no rank), Mandibulata (no rank), Arthropoda (phylum), Panarthropoda (no rank), Ecdysoz…
112	V9I6X1	V9I6X1_APICE	Ubiquitin	Apis cerana (Indian honeybee)	21321	metabolic process [GO:0008152]	metabolic process [GO:0008152]				Apis (genus), Apini (tribe), Apinae (subfamily), Apidae (family), Apoidea (superfamily), Aculeata (infraorder), Apocrita (suborder), Hymenoptera (order), Endopterygota (cohort), Neoptera (infraclass), Pterygota (subclass), Dicondylia (no rank), Insecta (class), Hexapoda (subphylum), Pancrustacea (no rank), Mandibulata (no rank), Arthropoda (phylum), Panarthropoda (no rank), Ecdysozoa (no rank), P…
113	V9II55	V9II55_APICE	Heat shock protein	Apis cerana (Indian honeybee)	60413	protein refolding [GO:0042026]	ATP binding [GO:0005524]; ATP-dependent protein folding chaperone [GO:0140662]; protein refolding [GO:0042026]	ATP binding [GO:0005524]; ATP-dependent protein folding chaperone [GO:0140662]		Chaperonin (HSP60) family	Apis (genus), Apini (tribe), Apinae (subfamily), Apidae (family), Apoidea (superfamily), Aculeata (infraorder), Apocrita (suborder), Hymenoptera (order), Endopterygota (cohort), Neoptera (infraclass), Pterygota (subclass), Dicondylia (no rank), Insecta (class), Hexapoda (subphylum), Pancrustacea (no rank), Mandibulata (no rank), Arthropoda (phylum), Panarthropoda (no rank), Ecdysozoa (no rank), P…
114	A9CMG7	A9CMG7_VESXA	Hornet silk protein Vssilk 2	Vespa xanthoptera (Japanese yellow hornet) (Vespa simillima xanthoptera)	36386				17986776		Vespa simillima (species), Vespa (genus), Vespinae (subfamily), Vespidae (family), Vespoidea (superfamily), Aculeata (infraorder), Apocrita (suborder), Hymenoptera (order), Endopterygota (cohort), Neoptera (infraclass), Pterygota (subclass), Dicondylia (no rank), Insecta (class), Hexapoda (subphylum), Pancrustacea (no rank), Mandibulata (no rank), Arthropoda (phylum), Panarthropoda (no rank), Ecd…
115	A0A154PQ04	A0A154PQ04_DUFNO	Fructose-bisphosphate aldolase (EC 4.1.2.13)	Dufourea novaeangliae (Sweat bee)	39729	glycolytic process [GO:0006096]	fructose-bisphosphate aldolase activity [GO:0004332]; glycolytic process [GO:0006096]	fructose-bisphosphate aldolase activity [GO:0004332]		Class I fructose-bisphosphate aldolase family	Dufourea (genus), Rophitinae (subfamily), Halictidae (family), Apoidea (superfamily), Aculeata (infraorder), Apocrita (suborder), Hymenoptera (order), Endopterygota (cohort), Neoptera (infraclass), Pterygota (subclass), Dicondylia (no rank), Insecta (class), Hexapoda (subphylum), Pancrustacea (no rank), Mandibulata (no rank), Arthropoda (phylum), Panarthropoda (no rank), Ecdysozoa (no rank), Prot…
116	A0A154PL96	A0A154PL96_DUFNO	Pyruvate dehydrogenase E1 component subunit beta (EC 1.2.4.1)	Dufourea novaeangliae (Sweat bee)	35579	acetyl-CoA biosynthetic process from pyruvate [GO:0006086]	pyruvate dehydrogenase (acetyl-transferring) activity [GO:0004739]; acetyl-CoA biosynthetic process from pyruvate [GO:0006086]	pyruvate dehydrogenase (acetyl-transferring) activity [GO:0004739]			Dufourea (genus), Rophitinae (subfamily), Halictidae (family), Apoidea (superfamily), Aculeata (infraorder), Apocrita (suborder), Hymenoptera (order), Endopterygota (cohort), Neoptera (infraclass), Pterygota (subclass), Dicondylia (no rank), Insecta (class), Hexapoda (subphylum), Pancrustacea (no rank), Mandibulata (no rank), Arthropoda (phylum), Panarthropoda (no rank), Ecdysozoa (no rank), Prot…
117	V9IH34	V9IH34_APICE	10 kDa heat shock protein, mitochondrial (10 kDa chaperonin) (Chaperonin 10)	Apis cerana (Indian honeybee)	11403		ATP binding [GO:0005524]; protein folding chaperone [GO:0044183]	ATP binding [GO:0005524]; protein folding chaperone [GO:0044183]		GroES chaperonin family	Apis (genus), Apini (tribe), Apinae (subfamily), Apidae (family), Apoidea (superfamily), Aculeata (infraorder), Apocrita (suborder), Hymenoptera (order), Endopterygota (cohort), Neoptera (infraclass), Pterygota (subclass), Dicondylia (no rank), Insecta (class), Hexapoda (subphylum), Pancrustacea (no rank), Mandibulata (no rank), Arthropoda (phylum), Panarthropoda (no rank), Ecdysozoa (no rank), P…
118	A0A833RNQ4	A0A833RNQ4_9HYME	N-sulfoglucosamine sulfohydrolase	Frieseomelitta varia	59269		sulfuric ester hydrolase activity [GO:0008484]	sulfuric ester hydrolase activity [GO:0008484]		Sulfatase family	Frieseomelitta (genus), Meliponini (tribe), Apinae (subfamily), Apidae (family), Apoidea (superfamily), Aculeata (infraorder), Apocrita (suborder), Hymenoptera (order), Endopterygota (cohort), Neoptera (infraclass), Pterygota (subclass), Dicondylia (no rank), Insecta (class), Hexapoda (subphylum), Pancrustacea (no rank), Mandibulata (no rank), Arthropoda (phylum), Panarthropoda (no rank), Ecdysoz…
119	Q6VQ13	Q6VQ13_APIME	ADP/ATP translocase (ADP,ATP carrier protein)	Apis mellifera (Honeybee)	32986	mitochondrial ADP transmembrane transport [GO:0140021]; mitochondrial ATP transmembrane transport [GO:1990544]	mitochondrial inner membrane [GO:0005743]; ATP:ADP antiporter activity [GO:0005471]; mitochondrial ADP transmembrane transport [GO:0140021]; mitochondrial ATP transmembrane transport [GO:1990544]	ATP:ADP antiporter activity [GO:0005471]	17073008; 24479613; 25331961	Mitochondrial carrier (TC 2.A.29) family	Apis (genus), Apini (tribe), Apinae (subfamily), Apidae (family), Apoidea (superfamily), Aculeata (infraorder), Apocrita (suborder), Hymenoptera (order), Endopterygota (cohort), Neoptera (infraclass), Pterygota (subclass), Dicondylia (no rank), Insecta (class), Hexapoda (subphylum), Pancrustacea (no rank), Mandibulata (no rank), Arthropoda (phylum), Panarthropoda (no rank), Ecdysozoa (no rank), P…
120	A0A7M7TFV4	A0A7M7TFV4_APIME	Zinc carboxypeptidase	Apis mellifera (Honeybee)	46603	proteolysis [GO:0006508]	metallocarboxypeptidase activity [GO:0004181]; zinc ion binding [GO:0008270]; proteolysis [GO:0006508]	metallocarboxypeptidase activity [GO:0004181]; zinc ion binding [GO:0008270]		Peptidase M14 family	Apis (genus), Apini (tribe), Apinae (subfamily), Apidae (family), Apoidea (superfamily), Aculeata (infraorder), Apocrita (suborder), Hymenoptera (order), Endopterygota (cohort), Neoptera (infraclass), Pterygota (subclass), Dicondylia (no rank), Insecta (class), Hexapoda (subphylum), Pancrustacea (no rank), Mandibulata (no rank), Arthropoda (phylum), Panarthropoda (no rank), Ecdysozoa (no rank), P…
121	A0A154P3S2	A0A154P3S2_DUFNO	Muscle M-line assembly protein unc-89	Dufourea novaeangliae (Sweat bee)	635364	anatomical structure morphogenesis [GO:0009653]; cell differentiation [GO:0030154]; protein phosphorylation [GO:0006468]	ATP binding [GO:0005524]; guanyl-nucleotide exchange factor activity [GO:0005085]; protein kinase activity [GO:0004672]; anatomical structure morphogenesis [GO:0009653]; cell differentiation [GO:0030154]; protein phosphorylation [GO:0006468]	ATP binding [GO:0005524]; guanyl-nucleotide exchange factor activity [GO:0005085]; protein kinase activity [GO:0004672]		Protein kinase superfamily, CAMK Ser/Thr protein kinase family	Dufourea (genus), Rophitinae (subfamily), Halictidae (family), Apoidea (superfamily), Aculeata (infraorder), Apocrita (suborder), Hymenoptera (order), Endopterygota (cohort), Neoptera (infraclass), Pterygota (subclass), Dicondylia (no rank), Insecta (class), Hexapoda (subphylum), Pancrustacea (no rank), Mandibulata (no rank), Arthropoda (phylum), Panarthropoda (no rank), Ecdysozoa (no rank), Prot…
122	A0A2A3E889	A0A2A3E889_APICC	Hexamerin	Apis cerana cerana (Oriental honeybee)	79018						Apis cerana (species), Apis (genus), Apini (tribe), Apinae (subfamily), Apidae (family), Apoidea (superfamily), Aculeata (infraorder), Apocrita (suborder), Hymenoptera (order), Endopterygota (cohort), Neoptera (infraclass), Pterygota (subclass), Dicondylia (no rank), Insecta (class), Hexapoda (subphylum), Pancrustacea (no rank), Mandibulata (no rank), Arthropoda (phylum), Panarthropoda (no rank),…
123	V9I8N5	V9I8N5_APICE	Calpain-3	Apis cerana (Indian honeybee)	85819	proteolysis [GO:0006508]	calcium ion binding [GO:0005509]; calcium-dependent cysteine-type endopeptidase activity [GO:0004198]; proteolysis [GO:0006508]	calcium ion binding [GO:0005509]; calcium-dependent cysteine-type endopeptidase activity [GO:0004198]		Peptidase C2 family	Apis (genus), Apini (tribe), Apinae (subfamily), Apidae (family), Apoidea (superfamily), Aculeata (infraorder), Apocrita (suborder), Hymenoptera (order), Endopterygota (cohort), Neoptera (infraclass), Pterygota (subclass), Dicondylia (no rank), Insecta (class), Hexapoda (subphylum), Pancrustacea (no rank), Mandibulata (no rank), Arthropoda (phylum), Panarthropoda (no rank), Ecdysozoa (no rank), P…
124	Q7YXM6	Q7YXM6_APILI	Superoxide dismutase [Cu-Zn] (EC 1.15.1.1)	Apis mellifera ligustica (Common honeybee) (Italian honeybee)	15634		copper ion binding [GO:0005507]; superoxide dismutase activity [GO:0004784]	copper ion binding [GO:0005507]; superoxide dismutase activity [GO:0004784]	11932240; 16139867	Cu-Zn superoxide dismutase family	Apis mellifera (species), Apis (genus), Apini (tribe), Apinae (subfamily), Apidae (family), Apoidea (superfamily), Aculeata (infraorder), Apocrita (suborder), Hymenoptera (order), Endopterygota (cohort), Neoptera (infraclass), Pterygota (subclass), Dicondylia (no rank), Insecta (class), Hexapoda (subphylum), Pancrustacea (no rank), Mandibulata (no rank), Arthropoda (phylum), Panarthropoda (no ran…
125	A0A833RF82	A0A833RF82_9HYME	fumarate hydratase (EC 4.2.1.2)	Frieseomelitta varia	53349	fumarate metabolic process [GO:0006106]; tricarboxylic acid cycle [GO:0006099]	tricarboxylic acid cycle enzyme complex [GO:0045239]; fumarate hydratase activity [GO:0004333]; fumarate metabolic process [GO:0006106]; tricarboxylic acid cycle [GO:0006099]	fumarate hydratase activity [GO:0004333]		Class-II fumarase/aspartase family, Fumarase subfamily	Frieseomelitta (genus), Meliponini (tribe), Apinae (subfamily), Apidae (family), Apoidea (superfamily), Aculeata (infraorder), Apocrita (suborder), Hymenoptera (order), Endopterygota (cohort), Neoptera (infraclass), Pterygota (subclass), Dicondylia (no rank), Insecta (class), Hexapoda (subphylum), Pancrustacea (no rank), Mandibulata (no rank), Arthropoda (phylum), Panarthropoda (no rank), Ecdysoz…
126	A0A7M7G1N6	A0A7M7G1N6_APIME	NPC intracellular cholesterol transporter 2	Apis mellifera (Honeybee)	16123	intracellular cholesterol transport [GO:0032367]	extracellular region [GO:0005576]; sterol binding [GO:0032934]; intracellular cholesterol transport [GO:0032367]	sterol binding [GO:0032934]		NPC2 family	Apis (genus), Apini (tribe), Apinae (subfamily), Apidae (family), Apoidea (superfamily), Aculeata (infraorder), Apocrita (suborder), Hymenoptera (order), Endopterygota (cohort), Neoptera (infraclass), Pterygota (subclass), Dicondylia (no rank), Insecta (class), Hexapoda (subphylum), Pancrustacea (no rank), Mandibulata (no rank), Arthropoda (phylum), Panarthropoda (no rank), Ecdysozoa (no rank), P…
127	A0A7M7GWN5	A0A7M7GWN5_APIME	Arylsulfatase B	Apis mellifera (Honeybee)	61106		sulfuric ester hydrolase activity [GO:0008484]	sulfuric ester hydrolase activity [GO:0008484]		Sulfatase family	Apis (genus), Apini (tribe), Apinae (subfamily), Apidae (family), Apoidea (superfamily), Aculeata (infraorder), Apocrita (suborder), Hymenoptera (order), Endopterygota (cohort), Neoptera (infraclass), Pterygota (subclass), Dicondylia (no rank), Insecta (class), Hexapoda (subphylum), Pancrustacea (no rank), Mandibulata (no rank), Arthropoda (phylum), Panarthropoda (no rank), Ecdysozoa (no rank), P…
128	A0A154PNQ0	A0A154PNQ0_DUFNO	Sortilin-related receptor (Low-density lipoprotein receptor relative with 11 ligand-binding repeats) (Sorting protein-related receptor containing LDLR class A repeats)	Dufourea novaeangliae (Sweat bee)	518687	actin filament capping [GO:0051693]; endocytosis [GO:0006897]	early endosome membrane [GO:0031901]; endoplasmic reticulum membrane [GO:0005789]; extracellular region [GO:0005576]; Golgi membrane [GO:0000139]; multivesicular body membrane [GO:0032585]; plasma membrane [GO:0005886]; recycling endosome membrane [GO:0055038]; transport vesicle membrane [GO:0030658]; actin binding [GO:0003779]; actin filament capping [GO:0051693]; endocytosis [GO:0006897]	actin binding [GO:0003779]		VPS10-related sortilin family, SORL1 subfamily; Spectrin family	Dufourea (genus), Rophitinae (subfamily), Halictidae (family), Apoidea (superfamily), Aculeata (infraorder), Apocrita (suborder), Hymenoptera (order), Endopterygota (cohort), Neoptera (infraclass), Pterygota (subclass), Dicondylia (no rank), Insecta (class), Hexapoda (subphylum), Pancrustacea (no rank), Mandibulata (no rank), Arthropoda (phylum), Panarthropoda (no rank), Ecdysozoa (no rank), Prot…
129	A0A154NYA3	A0A154NYA3_DUFNO	Cytochrome c-2	Dufourea novaeangliae (Sweat bee)	17265		mitochondrial intermembrane space [GO:0005758]; respirasome [GO:0070469]; electron transfer activity [GO:0009055]; heme binding [GO:0020037]; metal ion binding [GO:0046872]	electron transfer activity [GO:0009055]; heme binding [GO:0020037]; metal ion binding [GO:0046872]		Cytochrome c family	Dufourea (genus), Rophitinae (subfamily), Halictidae (family), Apoidea (superfamily), Aculeata (infraorder), Apocrita (suborder), Hymenoptera (order), Endopterygota (cohort), Neoptera (infraclass), Pterygota (subclass), Dicondylia (no rank), Insecta (class), Hexapoda (subphylum), Pancrustacea (no rank), Mandibulata (no rank), Arthropoda (phylum), Panarthropoda (no rank), Ecdysozoa (no rank), Prot…
130	V9ID93	V9ID93_APICE	Annexin	Apis cerana (Indian honeybee)	36560		membrane [GO:0016020]; calcium ion binding [GO:0005509]; calcium-dependent phospholipid binding [GO:0005544]	calcium ion binding [GO:0005509]; calcium-dependent phospholipid binding [GO:0005544]		Annexin family	Apis (genus), Apini (tribe), Apinae (subfamily), Apidae (family), Apoidea (superfamily), Aculeata (infraorder), Apocrita (suborder), Hymenoptera (order), Endopterygota (cohort), Neoptera (infraclass), Pterygota (subclass), Dicondylia (no rank), Insecta (class), Hexapoda (subphylum), Pancrustacea (no rank), Mandibulata (no rank), Arthropoda (phylum), Panarthropoda (no rank), Ecdysozoa (no rank), P…
131	V9IHT5	V9IHT5_APICE	Aconitate hydratase, mitochondrial (Aconitase) (EC 4.2.1.3)	Apis cerana (Indian honeybee)	86049	tricarboxylic acid cycle [GO:0006099]	mitochondrion [GO:0005739]; 4 iron, 4 sulfur cluster binding [GO:0051539]; aconitate hydratase activity [GO:0003994]; citrate dehydratase activity [GO:0047780]; metal ion binding [GO:0046872]; tricarboxylic acid cycle [GO:0006099]	4 iron, 4 sulfur cluster binding [GO:0051539]; aconitate hydratase activity [GO:0003994]; citrate dehydratase activity [GO:0047780]; metal ion binding [GO:0046872]		Aconitase/IPM isomerase family	Apis (genus), Apini (tribe), Apinae (subfamily), Apidae (family), Apoidea (superfamily), Aculeata (infraorder), Apocrita (suborder), Hymenoptera (order), Endopterygota (cohort), Neoptera (infraclass), Pterygota (subclass), Dicondylia (no rank), Insecta (class), Hexapoda (subphylum), Pancrustacea (no rank), Mandibulata (no rank), Arthropoda (phylum), Panarthropoda (no rank), Ecdysozoa (no rank), P…
132	A0A154PE24	A0A154PE24_DUFNO	phosphoenolpyruvate carboxykinase (GTP) (EC 4.1.1.32)	Dufourea novaeangliae (Sweat bee)	79983	gluconeogenesis [GO:0006094]; phosphorylation [GO:0016310]	GTP binding [GO:0005525]; kinase activity [GO:0016301]; metal ion binding [GO:0046872]; phosphoenolpyruvate carboxykinase (GTP) activity [GO:0004613]; gluconeogenesis [GO:0006094]; phosphorylation [GO:0016310]	GTP binding [GO:0005525]; kinase activity [GO:0016301]; metal ion binding [GO:0046872]; phosphoenolpyruvate carboxykinase (GTP) activity [GO:0004613]		Phosphoenolpyruvate carboxykinase [GTP] family	Dufourea (genus), Rophitinae (subfamily), Halictidae (family), Apoidea (superfamily), Aculeata (infraorder), Apocrita (suborder), Hymenoptera (order), Endopterygota (cohort), Neoptera (infraclass), Pterygota (subclass), Dicondylia (no rank), Insecta (class), Hexapoda (subphylum), Pancrustacea (no rank), Mandibulata (no rank), Arthropoda (phylum), Panarthropoda (no rank), Ecdysozoa (no rank), Prot…
133	A0A7M7R616	A0A7M7R616_APIME	phosphoenolpyruvate carboxykinase (GTP) (EC 4.1.1.32)	Apis mellifera (Honeybee)	79779	gluconeogenesis [GO:0006094]	GTP binding [GO:0005525]; metal ion binding [GO:0046872]; phosphoenolpyruvate carboxykinase (GTP) activity [GO:0004613]; gluconeogenesis [GO:0006094]	GTP binding [GO:0005525]; metal ion binding [GO:0046872]; phosphoenolpyruvate carboxykinase (GTP) activity [GO:0004613]		Phosphoenolpyruvate carboxykinase [GTP] family	Apis (genus), Apini (tribe), Apinae (subfamily), Apidae (family), Apoidea (superfamily), Aculeata (infraorder), Apocrita (suborder), Hymenoptera (order), Endopterygota (cohort), Neoptera (infraclass), Pterygota (subclass), Dicondylia (no rank), Insecta (class), Hexapoda (subphylum), Pancrustacea (no rank), Mandibulata (no rank), Arthropoda (phylum), Panarthropoda (no rank), Ecdysozoa (no rank), P…
134	A0A833W9E6	A0A833W9E6_9HYME	Dihydrolipoyl dehydrogenase (EC 1.8.1.4)	Frieseomelitta varia	54552		dihydrolipoyl dehydrogenase activity [GO:0004148]; flavin adenine dinucleotide binding [GO:0050660]	dihydrolipoyl dehydrogenase activity [GO:0004148]; flavin adenine dinucleotide binding [GO:0050660]		Class-I pyridine nucleotide-disulfide oxidoreductase family	Frieseomelitta (genus), Meliponini (tribe), Apinae (subfamily), Apidae (family), Apoidea (superfamily), Aculeata (infraorder), Apocrita (suborder), Hymenoptera (order), Endopterygota (cohort), Neoptera (infraclass), Pterygota (subclass), Dicondylia (no rank), Insecta (class), Hexapoda (subphylum), Pancrustacea (no rank), Mandibulata (no rank), Arthropoda (phylum), Panarthropoda (no rank), Ecdysoz…
135	A0A154PFC9	A0A154PFC9_DUFNO	Ornithine aminotransferase (EC 2.6.1.13)	Dufourea novaeangliae (Sweat bee)	47139	L-proline biosynthetic process [GO:0055129]	ornithine(lysine) transaminase activity [GO:0050155]; ornithine-oxo-acid transaminase activity [GO:0004587]; pyridoxal phosphate binding [GO:0030170]; L-proline biosynthetic process [GO:0055129]	ornithine(lysine) transaminase activity [GO:0050155]; ornithine-oxo-acid transaminase activity [GO:0004587]; pyridoxal phosphate binding [GO:0030170]		Class-III pyridoxal-phosphate-dependent aminotransferase family	Dufourea (genus), Rophitinae (subfamily), Halictidae (family), Apoidea (superfamily), Aculeata (infraorder), Apocrita (suborder), Hymenoptera (order), Endopterygota (cohort), Neoptera (infraclass), Pterygota (subclass), Dicondylia (no rank), Insecta (class), Hexapoda (subphylum), Pancrustacea (no rank), Mandibulata (no rank), Arthropoda (phylum), Panarthropoda (no rank), Ecdysozoa (no rank), Prot…
136	V9IA83	V9IA83_APICE	Alpha,alpha-trehalose-phosphate synthase [UDP-forming] A	Apis cerana (Indian honeybee)	90127	trehalose biosynthetic process [GO:0005992]	catalytic activity [GO:0003824]; trehalose biosynthetic process [GO:0005992]	catalytic activity [GO:0003824]		Trehalose phosphatase family; Glycosyltransferase 20 family	Apis (genus), Apini (tribe), Apinae (subfamily), Apidae (family), Apoidea (superfamily), Aculeata (infraorder), Apocrita (suborder), Hymenoptera (order), Endopterygota (cohort), Neoptera (infraclass), Pterygota (subclass), Dicondylia (no rank), Insecta (class), Hexapoda (subphylum), Pancrustacea (no rank), Mandibulata (no rank), Arthropoda (phylum), Panarthropoda (no rank), Ecdysozoa (no rank), P…
137	A9CMG6	A9CMG6_VESXA	Hornet silk protein Vssilk 1	Vespa xanthoptera (Japanese yellow hornet) (Vespa simillima xanthoptera)	35843				17986776		Vespa simillima (species), Vespa (genus), Vespinae (subfamily), Vespidae (family), Vespoidea (superfamily), Aculeata (infraorder), Apocrita (suborder), Hymenoptera (order), Endopterygota (cohort), Neoptera (infraclass), Pterygota (subclass), Dicondylia (no rank), Insecta (class), Hexapoda (subphylum), Pancrustacea (no rank), Mandibulata (no rank), Arthropoda (phylum), Panarthropoda (no rank), Ecd…
138	A0A7M7ML48	A0A7M7ML48_APIME	Titin isoform X18	Apis mellifera (Honeybee)	2218583	cellular component organization [GO:0016043]	cytoplasm [GO:0005737]; cellular component organization [GO:0016043]				Apis (genus), Apini (tribe), Apinae (subfamily), Apidae (family), Apoidea (superfamily), Aculeata (infraorder), Apocrita (suborder), Hymenoptera (order), Endopterygota (cohort), Neoptera (infraclass), Pterygota (subclass), Dicondylia (no rank), Insecta (class), Hexapoda (subphylum), Pancrustacea (no rank), Mandibulata (no rank), Arthropoda (phylum), Panarthropoda (no rank), Ecdysozoa (no rank), P…
139	V9IEZ2	V9IEZ2_APICE	Heat shock protein	Apis cerana (Indian honeybee)	71086		ATP binding [GO:0005524]; ATP-dependent protein folding chaperone [GO:0140662]	ATP binding [GO:0005524]; ATP-dependent protein folding chaperone [GO:0140662]		Heat shock protein 70 family	Apis (genus), Apini (tribe), Apinae (subfamily), Apidae (family), Apoidea (superfamily), Aculeata (infraorder), Apocrita (suborder), Hymenoptera (order), Endopterygota (cohort), Neoptera (infraclass), Pterygota (subclass), Dicondylia (no rank), Insecta (class), Hexapoda (subphylum), Pancrustacea (no rank), Mandibulata (no rank), Arthropoda (phylum), Panarthropoda (no rank), Ecdysozoa (no rank), P…
140	A0A833S6L6	A0A833S6L6_9HYME	arginine kinase (EC 2.7.3.3)	Frieseomelitta varia	53454	phosphocreatine biosynthetic process [GO:0046314]; phosphorylation [GO:0016310]	arginine kinase activity [GO:0004054]; ATP binding [GO:0005524]; creatine kinase activity [GO:0004111]; phosphocreatine biosynthetic process [GO:0046314]; phosphorylation [GO:0016310]	arginine kinase activity [GO:0004054]; ATP binding [GO:0005524]; creatine kinase activity [GO:0004111]		ATP:guanido phosphotransferase family	Frieseomelitta (genus), Meliponini (tribe), Apinae (subfamily), Apidae (family), Apoidea (superfamily), Aculeata (infraorder), Apocrita (suborder), Hymenoptera (order), Endopterygota (cohort), Neoptera (infraclass), Pterygota (subclass), Dicondylia (no rank), Insecta (class), Hexapoda (subphylum), Pancrustacea (no rank), Mandibulata (no rank), Arthropoda (phylum), Panarthropoda (no rank), Ecdysoz…
141	A0A1B1VVK2	A0A1B1VVK2_9COLE	arginine kinase (EC 2.7.3.3)	Anchycteis velutina	27239	phosphocreatine biosynthetic process [GO:0046314]; phosphorylation [GO:0016310]	arginine kinase activity [GO:0004054]; ATP binding [GO:0005524]; creatine kinase activity [GO:0004111]; phosphocreatine biosynthetic process [GO:0046314]; phosphorylation [GO:0016310]	arginine kinase activity [GO:0004054]; ATP binding [GO:0005524]; creatine kinase activity [GO:0004111]		ATP:guanido phosphotransferase family	Anchycteis (genus), Ptilodactylidae (family), Byrrhoidea (superfamily), Elateriformia (infraorder), Polyphaga (suborder), Coleoptera (order), Endopterygota (cohort), Neoptera (infraclass), Pterygota (subclass), Dicondylia (no rank), Insecta (class), Hexapoda (subphylum), Pancrustacea (no rank), Mandibulata (no rank), Arthropoda (phylum), Panarthropoda (no rank), Ecdysozoa (no rank), Protostomia (…
142	A0A154PJN9	A0A154PJN9_DUFNO	Heat shock 70 kDa protein cognate 3	Dufourea novaeangliae (Sweat bee)	72265		endoplasmic reticulum lumen [GO:0005788]; ATP binding [GO:0005524]; ATP-dependent protein folding chaperone [GO:0140662]	ATP binding [GO:0005524]; ATP-dependent protein folding chaperone [GO:0140662]		Heat shock protein 70 family	Dufourea (genus), Rophitinae (subfamily), Halictidae (family), Apoidea (superfamily), Aculeata (infraorder), Apocrita (suborder), Hymenoptera (order), Endopterygota (cohort), Neoptera (infraclass), Pterygota (subclass), Dicondylia (no rank), Insecta (class), Hexapoda (subphylum), Pancrustacea (no rank), Mandibulata (no rank), Arthropoda (phylum), Panarthropoda (no rank), Ecdysozoa (no rank), Prot…
143	A0A7M7GLV1	A0A7M7GLV1_APIME	Tropomyosin-1	Apis mellifera (Honeybee)	32157					Tropomyosin family	Apis (genus), Apini (tribe), Apinae (subfamily), Apidae (family), Apoidea (superfamily), Aculeata (infraorder), Apocrita (suborder), Hymenoptera (order), Endopterygota (cohort), Neoptera (infraclass), Pterygota (subclass), Dicondylia (no rank), Insecta (class), Hexapoda (subphylum), Pancrustacea (no rank), Mandibulata (no rank), Arthropoda (phylum), Panarthropoda (no rank), Ecdysozoa (no rank), P…
144	A0A833R489	A0A833R489_9HYME	Superoxide dismutase (EC 1.15.1.1)	Frieseomelitta varia	23565		metal ion binding [GO:0046872]; superoxide dismutase activity [GO:0004784]	metal ion binding [GO:0046872]; superoxide dismutase activity [GO:0004784]		Iron/manganese superoxide dismutase family	Frieseomelitta (genus), Meliponini (tribe), Apinae (subfamily), Apidae (family), Apoidea (superfamily), Aculeata (infraorder), Apocrita (suborder), Hymenoptera (order), Endopterygota (cohort), Neoptera (infraclass), Pterygota (subclass), Dicondylia (no rank), Insecta (class), Hexapoda (subphylum), Pancrustacea (no rank), Mandibulata (no rank), Arthropoda (phylum), Panarthropoda (no rank), Ecdysoz…
145	A0A833S5I5	A0A833S5I5_9HYME	Phosphoglycerate kinase (EC 2.7.2.3)	Frieseomelitta varia	47623	glycolytic process [GO:0006096]; phosphorylation [GO:0016310]	ATP binding [GO:0005524]; phosphoglycerate kinase activity [GO:0004618]; glycolytic process [GO:0006096]; phosphorylation [GO:0016310]	ATP binding [GO:0005524]; phosphoglycerate kinase activity [GO:0004618]		Phosphoglycerate kinase family	Frieseomelitta (genus), Meliponini (tribe), Apinae (subfamily), Apidae (family), Apoidea (superfamily), Aculeata (infraorder), Apocrita (suborder), Hymenoptera (order), Endopterygota (cohort), Neoptera (infraclass), Pterygota (subclass), Dicondylia (no rank), Insecta (class), Hexapoda (subphylum), Pancrustacea (no rank), Mandibulata (no rank), Arthropoda (phylum), Panarthropoda (no rank), Ecdysoz…
146	A0A7M6UVC2	A0A7M6UVC2_APIME	Heat shock protein Hsp70Ab-like	Apis mellifera (Honeybee)	70389		ATP binding [GO:0005524]; ATP-dependent protein folding chaperone [GO:0140662]	ATP binding [GO:0005524]; ATP-dependent protein folding chaperone [GO:0140662]	17073008; 18342467; 24479613	Heat shock protein 70 family	Apis (genus), Apini (tribe), Apinae (subfamily), Apidae (family), Apoidea (superfamily), Aculeata (infraorder), Apocrita (suborder), Hymenoptera (order), Endopterygota (cohort), Neoptera (infraclass), Pterygota (subclass), Dicondylia (no rank), Insecta (class), Hexapoda (subphylum), Pancrustacea (no rank), Mandibulata (no rank), Arthropoda (phylum), Panarthropoda (no rank), Ecdysozoa (no rank), P…
147	Q8WRL1	Q8WRL1_9HYME	Elongation factor 1-alpha	Agapostemon leunculus	40800		cytoplasm [GO:0005737]; GTP binding [GO:0005525]; GTPase activity [GO:0003924]; translation elongation factor activity [GO:0003746]	GTP binding [GO:0005525]; GTPase activity [GO:0003924]; translation elongation factor activity [GO:0003746]	11782550; 17015826	TRAFAC class translation factor GTPase superfamily, Classic translation factor GTPase family, EF-Tu/EF-1A subfamily	Agapostemon (genus), Halictini (tribe), Halictinae (subfamily), Halictidae (family), Apoidea (superfamily), Aculeata (infraorder), Apocrita (suborder), Hymenoptera (order), Endopterygota (cohort), Neoptera (infraclass), Pterygota (subclass), Dicondylia (no rank), Insecta (class), Hexapoda (subphylum), Pancrustacea (no rank), Mandibulata (no rank), Arthropoda (phylum), Panarthropoda (no rank), Ecd…
148	A0A7M7KXM0	A0A7M7KXM0_APIME	Twitchin isoform X2	Apis mellifera (Honeybee)	1069218	anatomical structure morphogenesis [GO:0009653]; cell differentiation [GO:0030154]; protein phosphorylation [GO:0006468]	ATP binding [GO:0005524]; protein kinase activity [GO:0004672]; anatomical structure morphogenesis [GO:0009653]; cell differentiation [GO:0030154]; protein phosphorylation [GO:0006468]	ATP binding [GO:0005524]; protein kinase activity [GO:0004672]		Protein kinase superfamily, CAMK Ser/Thr protein kinase family	Apis (genus), Apini (tribe), Apinae (subfamily), Apidae (family), Apoidea (superfamily), Aculeata (infraorder), Apocrita (suborder), Hymenoptera (order), Endopterygota (cohort), Neoptera (infraclass), Pterygota (subclass), Dicondylia (no rank), Insecta (class), Hexapoda (subphylum), Pancrustacea (no rank), Mandibulata (no rank), Arthropoda (phylum), Panarthropoda (no rank), Ecdysozoa (no rank), P…
149	A0A833SC55	A0A833SC55_9HYME	Rab GDP dissociation inhibitor	Frieseomelitta varia	49772	protein transport [GO:0015031]; small GTPase mediated signal transduction [GO:0007264]	cytoplasm [GO:0005737]; GTPase activator activity [GO:0005096]; Rab GDP-dissociation inhibitor activity [GO:0005093]; protein transport [GO:0015031]; small GTPase mediated signal transduction [GO:0007264]	GTPase activator activity [GO:0005096]; Rab GDP-dissociation inhibitor activity [GO:0005093]		Rab GDI family	Frieseomelitta (genus), Meliponini (tribe), Apinae (subfamily), Apidae (family), Apoidea (superfamily), Aculeata (infraorder), Apocrita (suborder), Hymenoptera (order), Endopterygota (cohort), Neoptera (infraclass), Pterygota (subclass), Dicondylia (no rank), Insecta (class), Hexapoda (subphylum), Pancrustacea (no rank), Mandibulata (no rank), Arthropoda (phylum), Panarthropoda (no rank), Ecdysoz…
150	A0A833RSF2	A0A833RSF2_9HYME	Succinate dehydrogenase [ubiquinone] flavoprotein subunit, mitochondrial (EC 1.3.5.1)	Frieseomelitta varia	151945	electron transport chain [GO:0022900]; tricarboxylic acid cycle [GO:0006099]	mitochondrial inner membrane [GO:0005743]; flavin adenine dinucleotide binding [GO:0050660]; oxidoreductase activity, acting on the CH-CH group of donors [GO:0016627]; electron transport chain [GO:0022900]; tricarboxylic acid cycle [GO:0006099]	flavin adenine dinucleotide binding [GO:0050660]; oxidoreductase activity, acting on the CH-CH group of donors [GO:0016627]		FAD-dependent oxidoreductase 2 family, FRD/SDH subfamily	Frieseomelitta (genus), Meliponini (tribe), Apinae (subfamily), Apidae (family), Apoidea (superfamily), Aculeata (infraorder), Apocrita (suborder), Hymenoptera (order), Endopterygota (cohort), Neoptera (infraclass), Pterygota (subclass), Dicondylia (no rank), Insecta (class), Hexapoda (subphylum), Pancrustacea (no rank), Mandibulata (no rank), Arthropoda (phylum), Panarthropoda (no rank), Ecdysoz…
151	Q7YXM5	Q7YXM5_APILI	Superoxide dismutase (EC 1.15.1.1)	Apis mellifera ligustica (Common honeybee) (Italian honeybee)	24567		metal ion binding [GO:0046872]; superoxide dismutase activity [GO:0004784]	metal ion binding [GO:0046872]; superoxide dismutase activity [GO:0004784]	11932240; 16139867	Iron/manganese superoxide dismutase family	Apis mellifera (species), Apis (genus), Apini (tribe), Apinae (subfamily), Apidae (family), Apoidea (superfamily), Aculeata (infraorder), Apocrita (suborder), Hymenoptera (order), Endopterygota (cohort), Neoptera (infraclass), Pterygota (subclass), Dicondylia (no rank), Insecta (class), Hexapoda (subphylum), Pancrustacea (no rank), Mandibulata (no rank), Arthropoda (phylum), Panarthropoda (no ran…
152	A0A7M7MP16	A0A7M7MP16_APIME	Transmembrane protease serine 9-like	Apis mellifera (Honeybee)	71962	proteolysis [GO:0006508]	serine-type endopeptidase activity [GO:0004252]; proteolysis [GO:0006508]	serine-type endopeptidase activity [GO:0004252]			Apis (genus), Apini (tribe), Apinae (subfamily), Apidae (family), Apoidea (superfamily), Aculeata (infraorder), Apocrita (suborder), Hymenoptera (order), Endopterygota (cohort), Neoptera (infraclass), Pterygota (subclass), Dicondylia (no rank), Insecta (class), Hexapoda (subphylum), Pancrustacea (no rank), Mandibulata (no rank), Arthropoda (phylum), Panarthropoda (no rank), Ecdysozoa (no rank), P…
153	V9IK10	V9IK10_APICE	Stress-70 protein	Apis cerana (Indian honeybee)	75404		ATP binding [GO:0005524]; ATP-dependent protein folding chaperone [GO:0140662]; unfolded protein binding [GO:0051082]	ATP binding [GO:0005524]; ATP-dependent protein folding chaperone [GO:0140662]; unfolded protein binding [GO:0051082]		Heat shock protein 70 family	Apis (genus), Apini (tribe), Apinae (subfamily), Apidae (family), Apoidea (superfamily), Aculeata (infraorder), Apocrita (suborder), Hymenoptera (order), Endopterygota (cohort), Neoptera (infraclass), Pterygota (subclass), Dicondylia (no rank), Insecta (class), Hexapoda (subphylum), Pancrustacea (no rank), Mandibulata (no rank), Arthropoda (phylum), Panarthropoda (no rank), Ecdysozoa (no rank), P…
154	A0A7M7IJ14	A0A7M7IJ14_APIME	Transmembrane protease serine 11B-like protein	Apis mellifera (Honeybee)	59876	proteolysis [GO:0006508]	serine-type endopeptidase activity [GO:0004252]; proteolysis [GO:0006508]	serine-type endopeptidase activity [GO:0004252]			Apis (genus), Apini (tribe), Apinae (subfamily), Apidae (family), Apoidea (superfamily), Aculeata (infraorder), Apocrita (suborder), Hymenoptera (order), Endopterygota (cohort), Neoptera (infraclass), Pterygota (subclass), Dicondylia (no rank), Insecta (class), Hexapoda (subphylum), Pancrustacea (no rank), Mandibulata (no rank), Arthropoda (phylum), Panarthropoda (no rank), Ecdysozoa (no rank), P…
155	A0A2A3EBQ8	A0A2A3EBQ8_APICC	oxoglutarate dehydrogenase (succinyl-transferring) (EC 1.2.4.2)	Apis cerana cerana (Oriental honeybee)	127624	tricarboxylic acid cycle [GO:0006099]	oxoglutarate dehydrogenase (succinyl-transferring) activity [GO:0004591]; thiamine pyrophosphate binding [GO:0030976]; tricarboxylic acid cycle [GO:0006099]	oxoglutarate dehydrogenase (succinyl-transferring) activity [GO:0004591]; thiamine pyrophosphate binding [GO:0030976]		Alpha-ketoglutarate dehydrogenase family	Apis cerana (species), Apis (genus), Apini (tribe), Apinae (subfamily), Apidae (family), Apoidea (superfamily), Aculeata (infraorder), Apocrita (suborder), Hymenoptera (order), Endopterygota (cohort), Neoptera (infraclass), Pterygota (subclass), Dicondylia (no rank), Insecta (class), Hexapoda (subphylum), Pancrustacea (no rank), Mandibulata (no rank), Arthropoda (phylum), Panarthropoda (no rank),…
156	A0A7M7TEZ5	A0A7M7TEZ5_APIME	Uncharacterized protein LOC409805 isoform X2	Apis mellifera (Honeybee)	29734						Apis (genus), Apini (tribe), Apinae (subfamily), Apidae (family), Apoidea (superfamily), Aculeata (infraorder), Apocrita (suborder), Hymenoptera (order), Endopterygota (cohort), Neoptera (infraclass), Pterygota (subclass), Dicondylia (no rank), Insecta (class), Hexapoda (subphylum), Pancrustacea (no rank), Mandibulata (no rank), Arthropoda (phylum), Panarthropoda (no rank), Ecdysozoa (no rank), P…
157	A0A7M7LSZ9	A0A7M7LSZ9_APIME	Myosin heavy chain, muscle isoform X3	Apis mellifera (Honeybee)	225000		myosin complex [GO:0016459]; sarcomere [GO:0030017]; actin filament binding [GO:0051015]; ATP binding [GO:0005524]; cytoskeletal motor activity [GO:0003774]	actin filament binding [GO:0051015]; ATP binding [GO:0005524]; cytoskeletal motor activity [GO:0003774]		TRAFAC class myosin-kinesin ATPase superfamily, Myosin family	Apis (genus), Apini (tribe), Apinae (subfamily), Apidae (family), Apoidea (superfamily), Aculeata (infraorder), Apocrita (suborder), Hymenoptera (order), Endopterygota (cohort), Neoptera (infraclass), Pterygota (subclass), Dicondylia (no rank), Insecta (class), Hexapoda (subphylum), Pancrustacea (no rank), Mandibulata (no rank), Arthropoda (phylum), Panarthropoda (no rank), Ecdysozoa (no rank), P…
158	V9IF19	V9IF19_APICE	Elongation factor 2	Apis cerana (Indian honeybee)	94582		GTP binding [GO:0005525]; GTPase activity [GO:0003924]; translation elongation factor activity [GO:0003746]	GTP binding [GO:0005525]; GTPase activity [GO:0003924]; translation elongation factor activity [GO:0003746]		TRAFAC class translation factor GTPase superfamily, Classic translation factor GTPase family, EF-G/EF-2 subfamily	Apis (genus), Apini (tribe), Apinae (subfamily), Apidae (family), Apoidea (superfamily), Aculeata (infraorder), Apocrita (suborder), Hymenoptera (order), Endopterygota (cohort), Neoptera (infraclass), Pterygota (subclass), Dicondylia (no rank), Insecta (class), Hexapoda (subphylum), Pancrustacea (no rank), Mandibulata (no rank), Arthropoda (phylum), Panarthropoda (no rank), Ecdysozoa (no rank), P…
159	A0A154PAE9	A0A154PAE9_DUFNO	Glyceraldehyde-3-phosphate dehydrogenase	Dufourea novaeangliae (Sweat bee)	32771		NAD binding [GO:0051287]; oxidoreductase activity, acting on the aldehyde or oxo group of donors, NAD or NADP as acceptor [GO:0016620]	NAD binding [GO:0051287]; oxidoreductase activity, acting on the aldehyde or oxo group of donors, NAD or NADP as acceptor [GO:0016620]		Glyceraldehyde-3-phosphate dehydrogenase family	Dufourea (genus), Rophitinae (subfamily), Halictidae (family), Apoidea (superfamily), Aculeata (infraorder), Apocrita (suborder), Hymenoptera (order), Endopterygota (cohort), Neoptera (infraclass), Pterygota (subclass), Dicondylia (no rank), Insecta (class), Hexapoda (subphylum), Pancrustacea (no rank), Mandibulata (no rank), Arthropoda (phylum), Panarthropoda (no rank), Ecdysozoa (no rank), Prot…
160	A0A154PS72	A0A154PS72_DUFNO	Profilin	Dufourea novaeangliae (Sweat bee)	13743	regulation of cellular component biogenesis [GO:0044087]; regulation of cellular component organization [GO:0051128]	cytoskeleton [GO:0005856]; actin binding [GO:0003779]; regulation of cellular component biogenesis [GO:0044087]; regulation of cellular component organization [GO:0051128]	actin binding [GO:0003779]		Profilin family	Dufourea (genus), Rophitinae (subfamily), Halictidae (family), Apoidea (superfamily), Aculeata (infraorder), Apocrita (suborder), Hymenoptera (order), Endopterygota (cohort), Neoptera (infraclass), Pterygota (subclass), Dicondylia (no rank), Insecta (class), Hexapoda (subphylum), Pancrustacea (no rank), Mandibulata (no rank), Arthropoda (phylum), Panarthropoda (no rank), Ecdysozoa (no rank), Prot…
161	A0A7M7SQ18	A0A7M7SQ18_APIME	Apolipophorins	Apis mellifera (Honeybee)	376809		lipid transporter activity [GO:0005319]	lipid transporter activity [GO:0005319]			Apis (genus), Apini (tribe), Apinae (subfamily), Apidae (family), Apoidea (superfamily), Aculeata (infraorder), Apocrita (suborder), Hymenoptera (order), Endopterygota (cohort), Neoptera (infraclass), Pterygota (subclass), Dicondylia (no rank), Insecta (class), Hexapoda (subphylum), Pancrustacea (no rank), Mandibulata (no rank), Arthropoda (phylum), Panarthropoda (no rank), Ecdysozoa (no rank), P…
162	V9IBB9	V9IBB9_APICE	Spermine synthase	Apis cerana (Indian honeybee)	30435	spermine biosynthetic process [GO:0006597]	spermine synthase activity [GO:0016768]; spermine biosynthetic process [GO:0006597]	spermine synthase activity [GO:0016768]		Spermidine/spermine synthase family	Apis (genus), Apini (tribe), Apinae (subfamily), Apidae (family), Apoidea (superfamily), Aculeata (infraorder), Apocrita (suborder), Hymenoptera (order), Endopterygota (cohort), Neoptera (infraclass), Pterygota (subclass), Dicondylia (no rank), Insecta (class), Hexapoda (subphylum), Pancrustacea (no rank), Mandibulata (no rank), Arthropoda (phylum), Panarthropoda (no rank), Ecdysozoa (no rank), P…
163	L0N3X9	L0N3X9_VESMA	Immune responsive protein 30	Vespa mandarinia japonica	30940				22001069		Vespa mandarinia (species), Vespa (genus), Vespinae (subfamily), Vespidae (family), Vespoidea (superfamily), Aculeata (infraorder), Apocrita (suborder), Hymenoptera (order), Endopterygota (cohort), Neoptera (infraclass), Pterygota (subclass), Dicondylia (no rank), Insecta (class), Hexapoda (subphylum), Pancrustacea (no rank), Mandibulata (no rank), Arthropoda (phylum), Panarthropoda (no rank), Ec…
164	A0A7M7LQ78	A0A7M7LQ78_APIME	Carboxypeptidase Q (Plasma glutamate carboxypeptidase)	Apis mellifera (Honeybee)	52947		endoplasmic reticulum [GO:0005783]; Golgi apparatus [GO:0005794]; lysosome [GO:0005764]; carboxypeptidase activity [GO:0004180]; metallodipeptidase activity [GO:0070573]	carboxypeptidase activity [GO:0004180]; metallodipeptidase activity [GO:0070573]			Apis (genus), Apini (tribe), Apinae (subfamily), Apidae (family), Apoidea (superfamily), Aculeata (infraorder), Apocrita (suborder), Hymenoptera (order), Endopterygota (cohort), Neoptera (infraclass), Pterygota (subclass), Dicondylia (no rank), Insecta (class), Hexapoda (subphylum), Pancrustacea (no rank), Mandibulata (no rank), Arthropoda (phylum), Panarthropoda (no rank), Ecdysozoa (no rank), P…
165	A0A833VPP9	A0A833VPP9_9HYME	Ornithine aminotransferase (EC 2.6.1.13)	Frieseomelitta varia	58437	L-proline biosynthetic process [GO:0055129]	ornithine-oxo-acid transaminase activity [GO:0004587]; pyridoxal phosphate binding [GO:0030170]; L-proline biosynthetic process [GO:0055129]	ornithine-oxo-acid transaminase activity [GO:0004587]; pyridoxal phosphate binding [GO:0030170]		Class-III pyridoxal-phosphate-dependent aminotransferase family	Frieseomelitta (genus), Meliponini (tribe), Apinae (subfamily), Apidae (family), Apoidea (superfamily), Aculeata (infraorder), Apocrita (suborder), Hymenoptera (order), Endopterygota (cohort), Neoptera (infraclass), Pterygota (subclass), Dicondylia (no rank), Insecta (class), Hexapoda (subphylum), Pancrustacea (no rank), Mandibulata (no rank), Arthropoda (phylum), Panarthropoda (no rank), Ecdysoz…
166	A0A7M7GX00	A0A7M7GX00_APIME	Troponin I isoform X18	Apis mellifera (Honeybee)	23688		troponin complex [GO:0005861]				Apis (genus), Apini (tribe), Apinae (subfamily), Apidae (family), Apoidea (superfamily), Aculeata (infraorder), Apocrita (suborder), Hymenoptera (order), Endopterygota (cohort), Neoptera (infraclass), Pterygota (subclass), Dicondylia (no rank), Insecta (class), Hexapoda (subphylum), Pancrustacea (no rank), Mandibulata (no rank), Arthropoda (phylum), Panarthropoda (no rank), Ecdysozoa (no rank), P…
167	A0A154PPS0	A0A154PPS0_DUFNO	phosphopyruvate hydratase (EC 4.2.1.11) (2-phospho-D-glycerate hydro-lyase)	Dufourea novaeangliae (Sweat bee)	46997	glycolytic process [GO:0006096]	phosphopyruvate hydratase complex [GO:0000015]; magnesium ion binding [GO:0000287]; phosphopyruvate hydratase activity [GO:0004634]; glycolytic process [GO:0006096]	magnesium ion binding [GO:0000287]; phosphopyruvate hydratase activity [GO:0004634]		Enolase family	Dufourea (genus), Rophitinae (subfamily), Halictidae (family), Apoidea (superfamily), Aculeata (infraorder), Apocrita (suborder), Hymenoptera (order), Endopterygota (cohort), Neoptera (infraclass), Pterygota (subclass), Dicondylia (no rank), Insecta (class), Hexapoda (subphylum), Pancrustacea (no rank), Mandibulata (no rank), Arthropoda (phylum), Panarthropoda (no rank), Ecdysozoa (no rank), Prot…
168	A0A7M7G8Z8	A0A7M7G8Z8_APIME	Peroxiredoxin 1	Apis mellifera (Honeybee)	21801		peroxiredoxin activity [GO:0051920]	peroxiredoxin activity [GO:0051920]		Peroxiredoxin family	Apis (genus), Apini (tribe), Apinae (subfamily), Apidae (family), Apoidea (superfamily), Aculeata (infraorder), Apocrita (suborder), Hymenoptera (order), Endopterygota (cohort), Neoptera (infraclass), Pterygota (subclass), Dicondylia (no rank), Insecta (class), Hexapoda (subphylum), Pancrustacea (no rank), Mandibulata (no rank), Arthropoda (phylum), Panarthropoda (no rank), Ecdysozoa (no rank), P…
169	A0A7M7GE53	A0A7M7GE53_APIME	Uncharacterized protein LOC100577527	Apis mellifera (Honeybee)	15811						Apis (genus), Apini (tribe), Apinae (subfamily), Apidae (family), Apoidea (superfamily), Aculeata (infraorder), Apocrita (suborder), Hymenoptera (order), Endopterygota (cohort), Neoptera (infraclass), Pterygota (subclass), Dicondylia (no rank), Insecta (class), Hexapoda (subphylum), Pancrustacea (no rank), Mandibulata (no rank), Arthropoda (phylum), Panarthropoda (no rank), Ecdysozoa (no rank), P…
170	A0A154PRP5	A0A154PRP5_DUFNO	Glycerol-3-phosphate dehydrogenase (EC 1.1.5.3)	Dufourea novaeangliae (Sweat bee)	80127	glycerol-3-phosphate metabolic process [GO:0006072]	glycerol-3-phosphate dehydrogenase complex [GO:0009331]; mitochondrion [GO:0005739]; calcium ion binding [GO:0005509]; sn-glycerol-3-phosphate:ubiquinone-8 oxidoreductase activity [GO:0052591]; glycerol-3-phosphate metabolic process [GO:0006072]	calcium ion binding [GO:0005509]; sn-glycerol-3-phosphate:ubiquinone-8 oxidoreductase activity [GO:0052591]		FAD-dependent glycerol-3-phosphate dehydrogenase family	Dufourea (genus), Rophitinae (subfamily), Halictidae (family), Apoidea (superfamily), Aculeata (infraorder), Apocrita (suborder), Hymenoptera (order), Endopterygota (cohort), Neoptera (infraclass), Pterygota (subclass), Dicondylia (no rank), Insecta (class), Hexapoda (subphylum), Pancrustacea (no rank), Mandibulata (no rank), Arthropoda (phylum), Panarthropoda (no rank), Ecdysozoa (no rank), Prot…
171	A0A154PIT4	A0A154PIT4_DUFNO	Rab GDP dissociation inhibitor	Dufourea novaeangliae (Sweat bee)	54914	protein transport [GO:0015031]; small GTPase mediated signal transduction [GO:0007264]	cytoplasm [GO:0005737]; GTPase activator activity [GO:0005096]; Rab GDP-dissociation inhibitor activity [GO:0005093]; protein transport [GO:0015031]; small GTPase mediated signal transduction [GO:0007264]	GTPase activator activity [GO:0005096]; Rab GDP-dissociation inhibitor activity [GO:0005093]		Rab GDI family	Dufourea (genus), Rophitinae (subfamily), Halictidae (family), Apoidea (superfamily), Aculeata (infraorder), Apocrita (suborder), Hymenoptera (order), Endopterygota (cohort), Neoptera (infraclass), Pterygota (subclass), Dicondylia (no rank), Insecta (class), Hexapoda (subphylum), Pancrustacea (no rank), Mandibulata (no rank), Arthropoda (phylum), Panarthropoda (no rank), Ecdysozoa (no rank), Prot…
172	A0A154PSQ8	A0A154PSQ8_DUFNO	Myosin heavy chain, muscle	Dufourea novaeangliae (Sweat bee)	256085		myosin complex [GO:0016459]; sarcomere [GO:0030017]; actin filament binding [GO:0051015]; ATP binding [GO:0005524]; cytoskeletal motor activity [GO:0003774]	actin filament binding [GO:0051015]; ATP binding [GO:0005524]; cytoskeletal motor activity [GO:0003774]		TRAFAC class myosin-kinesin ATPase superfamily, Myosin family	Dufourea (genus), Rophitinae (subfamily), Halictidae (family), Apoidea (superfamily), Aculeata (infraorder), Apocrita (suborder), Hymenoptera (order), Endopterygota (cohort), Neoptera (infraclass), Pterygota (subclass), Dicondylia (no rank), Insecta (class), Hexapoda (subphylum), Pancrustacea (no rank), Mandibulata (no rank), Arthropoda (phylum), Panarthropoda (no rank), Ecdysozoa (no rank), Prot…
173	Q25BT8	Q25BT8_APIME	alpha-glucosidase (EC 3.2.1.20)	Apis mellifera (Honeybee)	67357		membrane [GO:0016020]; maltose alpha-glucosidase activity [GO:0032450]	maltose alpha-glucosidase activity [GO:0032450]	15564675; 17073008; 17617712; 25331961		Apis (genus), Apini (tribe), Apinae (subfamily), Apidae (family), Apoidea (superfamily), Aculeata (infraorder), Apocrita (suborder), Hymenoptera (order), Endopterygota (cohort), Neoptera (infraclass), Pterygota (subclass), Dicondylia (no rank), Insecta (class), Hexapoda (subphylum), Pancrustacea (no rank), Mandibulata (no rank), Arthropoda (phylum), Panarthropoda (no rank), Ecdysozoa (no rank), P…
174	V9ID72	V9ID72_APICE	Isocitrate dehydrogenase [NAD] subunit, mitochondrial	Apis cerana (Indian honeybee)	39149	tricarboxylic acid cycle [GO:0006099]	mitochondrion [GO:0005739]; magnesium ion binding [GO:0000287]; NAD binding [GO:0051287]; oxidoreductase activity, acting on the CH-OH group of donors, NAD or NADP as acceptor [GO:0016616]; tricarboxylic acid cycle [GO:0006099]	magnesium ion binding [GO:0000287]; NAD binding [GO:0051287]; oxidoreductase activity, acting on the CH-OH group of donors, NAD or NADP as acceptor [GO:0016616]		Isocitrate and isopropylmalate dehydrogenases family	Apis (genus), Apini (tribe), Apinae (subfamily), Apidae (family), Apoidea (superfamily), Aculeata (infraorder), Apocrita (suborder), Hymenoptera (order), Endopterygota (cohort), Neoptera (infraclass), Pterygota (subclass), Dicondylia (no rank), Insecta (class), Hexapoda (subphylum), Pancrustacea (no rank), Mandibulata (no rank), Arthropoda (phylum), Panarthropoda (no rank), Ecdysozoa (no rank), P…
175	V9IK78	V9IK78_APICE	Tubulin beta chain	Apis cerana (Indian honeybee)	50175	microtubule-based process [GO:0007017]	microtubule [GO:0005874]; GTP binding [GO:0005525]; GTPase activity [GO:0003924]; structural constituent of cytoskeleton [GO:0005200]; microtubule-based process [GO:0007017]	GTP binding [GO:0005525]; GTPase activity [GO:0003924]; structural constituent of cytoskeleton [GO:0005200]		Tubulin family	Apis (genus), Apini (tribe), Apinae (subfamily), Apidae (family), Apoidea (superfamily), Aculeata (infraorder), Apocrita (suborder), Hymenoptera (order), Endopterygota (cohort), Neoptera (infraclass), Pterygota (subclass), Dicondylia (no rank), Insecta (class), Hexapoda (subphylum), Pancrustacea (no rank), Mandibulata (no rank), Arthropoda (phylum), Panarthropoda (no rank), Ecdysozoa (no rank), P…
176	E7CIJ1	E7CIJ1_VESMA	14-3-3 zeta	Vespa mandarinia (Asian giant hornet)	10249					14-3-3 family	Vespa (genus), Vespinae (subfamily), Vespidae (family), Vespoidea (superfamily), Aculeata (infraorder), Apocrita (suborder), Hymenoptera (order), Endopterygota (cohort), Neoptera (infraclass), Pterygota (subclass), Dicondylia (no rank), Insecta (class), Hexapoda (subphylum), Pancrustacea (no rank), Mandibulata (no rank), Arthropoda (phylum), Panarthropoda (no rank), Ecdysozoa (no rank), Protostom…
177	A0A833SA96	A0A833SA96_9HYME	Nucleoside diphosphate kinase (EC 2.7.4.6)	Frieseomelitta varia	22847	CTP biosynthetic process [GO:0006241]; GTP biosynthetic process [GO:0006183]; phosphorylation [GO:0016310]; UTP biosynthetic process [GO:0006228]	ATP binding [GO:0005524]; nucleoside diphosphate kinase activity [GO:0004550]; CTP biosynthetic process [GO:0006241]; GTP biosynthetic process [GO:0006183]; phosphorylation [GO:0016310]; UTP biosynthetic process [GO:0006228]	ATP binding [GO:0005524]; nucleoside diphosphate kinase activity [GO:0004550]			Frieseomelitta (genus), Meliponini (tribe), Apinae (subfamily), Apidae (family), Apoidea (superfamily), Aculeata (infraorder), Apocrita (suborder), Hymenoptera (order), Endopterygota (cohort), Neoptera (infraclass), Pterygota (subclass), Dicondylia (no rank), Insecta (class), Hexapoda (subphylum), Pancrustacea (no rank), Mandibulata (no rank), Arthropoda (phylum), Panarthropoda (no rank), Ecdysoz…
178	V9IHC2	V9IHC2_APICE	Calreticulin	Apis cerana (Indian honeybee)	47201	protein folding [GO:0006457]	endoplasmic reticulum lumen [GO:0005788]; calcium ion binding [GO:0005509]; unfolded protein binding [GO:0051082]; protein folding [GO:0006457]	calcium ion binding [GO:0005509]; unfolded protein binding [GO:0051082]		Calreticulin family	Apis (genus), Apini (tribe), Apinae (subfamily), Apidae (family), Apoidea (superfamily), Aculeata (infraorder), Apocrita (suborder), Hymenoptera (order), Endopterygota (cohort), Neoptera (infraclass), Pterygota (subclass), Dicondylia (no rank), Insecta (class), Hexapoda (subphylum), Pancrustacea (no rank), Mandibulata (no rank), Arthropoda (phylum), Panarthropoda (no rank), Ecdysozoa (no rank), P…
179	V9ID91	V9ID91_APICE	RNA helicase (EC 3.6.4.13)	Apis cerana (Indian honeybee)	48156		intracellular organelle [GO:0043229]; ATP binding [GO:0005524]; hydrolase activity [GO:0016787]; RNA helicase activity [GO:0003724]; translation initiation factor activity [GO:0003743]	ATP binding [GO:0005524]; hydrolase activity [GO:0016787]; RNA helicase activity [GO:0003724]; translation initiation factor activity [GO:0003743]		DEAD box helicase family, eIF4A subfamily	Apis (genus), Apini (tribe), Apinae (subfamily), Apidae (family), Apoidea (superfamily), Aculeata (infraorder), Apocrita (suborder), Hymenoptera (order), Endopterygota (cohort), Neoptera (infraclass), Pterygota (subclass), Dicondylia (no rank), Insecta (class), Hexapoda (subphylum), Pancrustacea (no rank), Mandibulata (no rank), Arthropoda (phylum), Panarthropoda (no rank), Ecdysozoa (no rank), P…
180	A0A7M7L1X5	A0A7M7L1X5_APIME	Proteasome subunit alpha type	Apis mellifera (Honeybee)	27486	ubiquitin-dependent protein catabolic process [GO:0006511]	cytoplasm [GO:0005737]; nucleus [GO:0005634]; proteasome core complex, alpha-subunit complex [GO:0019773]; ubiquitin-dependent protein catabolic process [GO:0006511]			Peptidase T1A family	Apis (genus), Apini (tribe), Apinae (subfamily), Apidae (family), Apoidea (superfamily), Aculeata (infraorder), Apocrita (suborder), Hymenoptera (order), Endopterygota (cohort), Neoptera (infraclass), Pterygota (subclass), Dicondylia (no rank), Insecta (class), Hexapoda (subphylum), Pancrustacea (no rank), Mandibulata (no rank), Arthropoda (phylum), Panarthropoda (no rank), Ecdysozoa (no rank), P…
181	A0A7M7G1K4	A0A7M7G1K4_APIME	Serine protease 53	Apis mellifera (Honeybee)	56959	proteolysis [GO:0006508]	serine-type endopeptidase activity [GO:0004252]; proteolysis [GO:0006508]	serine-type endopeptidase activity [GO:0004252]			Apis (genus), Apini (tribe), Apinae (subfamily), Apidae (family), Apoidea (superfamily), Aculeata (infraorder), Apocrita (suborder), Hymenoptera (order), Endopterygota (cohort), Neoptera (infraclass), Pterygota (subclass), Dicondylia (no rank), Insecta (class), Hexapoda (subphylum), Pancrustacea (no rank), Mandibulata (no rank), Arthropoda (phylum), Panarthropoda (no rank), Ecdysozoa (no rank), P…
182	A0A833RRC8	A0A833RRC8_9HYME	Thioredoxin reductase	Frieseomelitta varia	61863	cell redox homeostasis [GO:0045454]	flavin adenine dinucleotide binding [GO:0050660]; thioredoxin-disulfide reductase activity [GO:0004791]; cell redox homeostasis [GO:0045454]	flavin adenine dinucleotide binding [GO:0050660]; thioredoxin-disulfide reductase activity [GO:0004791]		Class-I pyridine nucleotide-disulfide oxidoreductase family	Frieseomelitta (genus), Meliponini (tribe), Apinae (subfamily), Apidae (family), Apoidea (superfamily), Aculeata (infraorder), Apocrita (suborder), Hymenoptera (order), Endopterygota (cohort), Neoptera (infraclass), Pterygota (subclass), Dicondylia (no rank), Insecta (class), Hexapoda (subphylum), Pancrustacea (no rank), Mandibulata (no rank), Arthropoda (phylum), Panarthropoda (no rank), Ecdysoz…
183	V9IKB3	V9IKB3_APICE	Ribosomal protein L15	Apis cerana (Indian honeybee)	23885	translation [GO:0006412]	ribonucleoprotein complex [GO:1990904]; ribosome [GO:0005840]; structural constituent of ribosome [GO:0003735]; translation [GO:0006412]	structural constituent of ribosome [GO:0003735]		Eukaryotic ribosomal protein eL15 family	Apis (genus), Apini (tribe), Apinae (subfamily), Apidae (family), Apoidea (superfamily), Aculeata (infraorder), Apocrita (suborder), Hymenoptera (order), Endopterygota (cohort), Neoptera (infraclass), Pterygota (subclass), Dicondylia (no rank), Insecta (class), Hexapoda (subphylum), Pancrustacea (no rank), Mandibulata (no rank), Arthropoda (phylum), Panarthropoda (no rank), Ecdysozoa (no rank), P…
184	V9II07	V9II07_APICE	Elongation factor 1-gamma	Apis cerana (Indian honeybee)	48986		translation elongation factor activity [GO:0003746]	translation elongation factor activity [GO:0003746]			Apis (genus), Apini (tribe), Apinae (subfamily), Apidae (family), Apoidea (superfamily), Aculeata (infraorder), Apocrita (suborder), Hymenoptera (order), Endopterygota (cohort), Neoptera (infraclass), Pterygota (subclass), Dicondylia (no rank), Insecta (class), Hexapoda (subphylum), Pancrustacea (no rank), Mandibulata (no rank), Arthropoda (phylum), Panarthropoda (no rank), Ecdysozoa (no rank), P…
185	A0A154PHR8	A0A154PHR8_DUFNO	Coronin	Dufourea novaeangliae (Sweat bee)	54646					WD repeat coronin family	Dufourea (genus), Rophitinae (subfamily), Halictidae (family), Apoidea (superfamily), Aculeata (infraorder), Apocrita (suborder), Hymenoptera (order), Endopterygota (cohort), Neoptera (infraclass), Pterygota (subclass), Dicondylia (no rank), Insecta (class), Hexapoda (subphylum), Pancrustacea (no rank), Mandibulata (no rank), Arthropoda (phylum), Panarthropoda (no rank), Ecdysozoa (no rank), Prot…
186	A0A833RN92	A0A833RN92_9HYME	Pyruvate carboxylase (EC 6.4.1.1)	Frieseomelitta varia	131268	gluconeogenesis [GO:0006094]; pyruvate metabolic process [GO:0006090]	ATP binding [GO:0005524]; metal ion binding [GO:0046872]; pyruvate carboxylase activity [GO:0004736]; gluconeogenesis [GO:0006094]; pyruvate metabolic process [GO:0006090]	ATP binding [GO:0005524]; metal ion binding [GO:0046872]; pyruvate carboxylase activity [GO:0004736]			Frieseomelitta (genus), Meliponini (tribe), Apinae (subfamily), Apidae (family), Apoidea (superfamily), Aculeata (infraorder), Apocrita (suborder), Hymenoptera (order), Endopterygota (cohort), Neoptera (infraclass), Pterygota (subclass), Dicondylia (no rank), Insecta (class), Hexapoda (subphylum), Pancrustacea (no rank), Mandibulata (no rank), Arthropoda (phylum), Panarthropoda (no rank), Ecdysoz…
187	A0A7M7G911	A0A7M7G911_APIME	Uncharacterized protein LOC727243	Apis mellifera (Honeybee)	24421						Apis (genus), Apini (tribe), Apinae (subfamily), Apidae (family), Apoidea (superfamily), Aculeata (infraorder), Apocrita (suborder), Hymenoptera (order), Endopterygota (cohort), Neoptera (infraclass), Pterygota (subclass), Dicondylia (no rank), Insecta (class), Hexapoda (subphylum), Pancrustacea (no rank), Mandibulata (no rank), Arthropoda (phylum), Panarthropoda (no rank), Ecdysozoa (no rank), P…
188	A0A7M7L4A7	A0A7M7L4A7_APIME	Heterogeneous nuclear ribonucleoprotein Q isoform X7	Apis mellifera (Honeybee)	73835		ribonucleoprotein complex [GO:1990904]; RNA binding [GO:0003723]	RNA binding [GO:0003723]			Apis (genus), Apini (tribe), Apinae (subfamily), Apidae (family), Apoidea (superfamily), Aculeata (infraorder), Apocrita (suborder), Hymenoptera (order), Endopterygota (cohort), Neoptera (infraclass), Pterygota (subclass), Dicondylia (no rank), Insecta (class), Hexapoda (subphylum), Pancrustacea (no rank), Mandibulata (no rank), Arthropoda (phylum), Panarthropoda (no rank), Ecdysozoa (no rank), P…
189	Q17TA6	Q17TA6_9HYME	arginine kinase (EC 2.7.3.3)	Bombus festivus	19624	phosphocreatine biosynthetic process [GO:0046314]; phosphorylation [GO:0016310]	arginine kinase activity [GO:0004054]; ATP binding [GO:0005524]; creatine kinase activity [GO:0004111]; phosphocreatine biosynthetic process [GO:0046314]; phosphorylation [GO:0016310]	arginine kinase activity [GO:0004054]; ATP binding [GO:0005524]; creatine kinase activity [GO:0004111]		ATP:guanido phosphotransferase family	Festivobombus (subgenus), Bombus (genus), Bombini (tribe), Apinae (subfamily), Apidae (family), Apoidea (superfamily), Aculeata (infraorder), Apocrita (suborder), Hymenoptera (order), Endopterygota (cohort), Neoptera (infraclass), Pterygota (subclass), Dicondylia (no rank), Insecta (class), Hexapoda (subphylum), Pancrustacea (no rank), Mandibulata (no rank), Arthropoda (phylum), Panarthropoda (no…
190	A0A833W1S3	A0A833W1S3_9HYME	Glucosamine-6-phosphate isomerase (EC 3.5.99.6) (Glucosamine-6-phosphate deaminase)	Frieseomelitta varia	31898	carbohydrate metabolic process [GO:0005975]; N-acetylglucosamine metabolic process [GO:0006044]	cytoplasm [GO:0005737]; glucosamine-6-phosphate deaminase activity [GO:0004342]; carbohydrate metabolic process [GO:0005975]; N-acetylglucosamine metabolic process [GO:0006044]	glucosamine-6-phosphate deaminase activity [GO:0004342]		Glucosamine/galactosamine-6-phosphate isomerase family	Frieseomelitta (genus), Meliponini (tribe), Apinae (subfamily), Apidae (family), Apoidea (superfamily), Aculeata (infraorder), Apocrita (suborder), Hymenoptera (order), Endopterygota (cohort), Neoptera (infraclass), Pterygota (subclass), Dicondylia (no rank), Insecta (class), Hexapoda (subphylum), Pancrustacea (no rank), Mandibulata (no rank), Arthropoda (phylum), Panarthropoda (no rank), Ecdysoz…
191	V9IE59	V9IE59_APICE	Tubulin alpha chain	Apis cerana (Indian honeybee)	49967	microtubule-based process [GO:0007017]	microtubule [GO:0005874]; GTP binding [GO:0005525]; hydrolase activity [GO:0016787]; structural constituent of cytoskeleton [GO:0005200]; microtubule-based process [GO:0007017]	GTP binding [GO:0005525]; hydrolase activity [GO:0016787]; structural constituent of cytoskeleton [GO:0005200]		Tubulin family	Apis (genus), Apini (tribe), Apinae (subfamily), Apidae (family), Apoidea (superfamily), Aculeata (infraorder), Apocrita (suborder), Hymenoptera (order), Endopterygota (cohort), Neoptera (infraclass), Pterygota (subclass), Dicondylia (no rank), Insecta (class), Hexapoda (subphylum), Pancrustacea (no rank), Mandibulata (no rank), Arthropoda (phylum), Panarthropoda (no rank), Ecdysozoa (no rank), P…
192	A0A7D5HR60	A0A7D5HR60_APIME	Malate dehydrogenase (EC 1.1.1.37)	Apis mellifera (Honeybee)	36158	malate metabolic process [GO:0006108]; tricarboxylic acid cycle [GO:0006099]	L-malate dehydrogenase activity [GO:0030060]; malate metabolic process [GO:0006108]; tricarboxylic acid cycle [GO:0006099]	L-malate dehydrogenase activity [GO:0030060]		LDH/MDH superfamily, MDH type 2 family	Apis (genus), Apini (tribe), Apinae (subfamily), Apidae (family), Apoidea (superfamily), Aculeata (infraorder), Apocrita (suborder), Hymenoptera (order), Endopterygota (cohort), Neoptera (infraclass), Pterygota (subclass), Dicondylia (no rank), Insecta (class), Hexapoda (subphylum), Pancrustacea (no rank), Mandibulata (no rank), Arthropoda (phylum), Panarthropoda (no rank), Ecdysozoa (no rank), P…
193	A0A833S1C5	A0A833S1C5_9HYME	Spectrin alpha chain	Frieseomelitta varia	278400	actin filament capping [GO:0051693]	cytoplasm [GO:0005737]; cytoskeleton [GO:0005856]; actin binding [GO:0003779]; calcium ion binding [GO:0005509]; calmodulin binding [GO:0005516]; actin filament capping [GO:0051693]	actin binding [GO:0003779]; calcium ion binding [GO:0005509]; calmodulin binding [GO:0005516]		Spectrin family	Frieseomelitta (genus), Meliponini (tribe), Apinae (subfamily), Apidae (family), Apoidea (superfamily), Aculeata (infraorder), Apocrita (suborder), Hymenoptera (order), Endopterygota (cohort), Neoptera (infraclass), Pterygota (subclass), Dicondylia (no rank), Insecta (class), Hexapoda (subphylum), Pancrustacea (no rank), Mandibulata (no rank), Arthropoda (phylum), Panarthropoda (no rank), Ecdysoz…
194	A0A7M7MXY7	A0A7M7MXY7_APIME	1,4-alpha-glucan branching enzyme (EC 2.4.1.18)	Apis mellifera (Honeybee)	80478	glycogen biosynthetic process [GO:0005978]	1,4-alpha-glucan branching enzyme activity [GO:0003844]; 1,4-alpha-glucan branching enzyme activity (using a glucosylated glycogenin as primer for glycogen synthesis) [GO:0102752]; cation binding [GO:0043169]; hydrolase activity, hydrolyzing O-glycosyl compounds [GO:0004553]; glycogen biosynthetic process [GO:0005978]	1,4-alpha-glucan branching enzyme activity [GO:0003844]; 1,4-alpha-glucan branching enzyme activity (using a glucosylated glycogenin as primer for glycogen synthesis) [GO:0102752]; cation binding [GO:0043169]; hydrolase activity, hydrolyzing O-glycosyl compounds [GO:0004553]		Glycosyl hydrolase 13 family, GlgB subfamily	Apis (genus), Apini (tribe), Apinae (subfamily), Apidae (family), Apoidea (superfamily), Aculeata (infraorder), Apocrita (suborder), Hymenoptera (order), Endopterygota (cohort), Neoptera (infraclass), Pterygota (subclass), Dicondylia (no rank), Insecta (class), Hexapoda (subphylum), Pancrustacea (no rank), Mandibulata (no rank), Arthropoda (phylum), Panarthropoda (no rank), Ecdysozoa (no rank), P…
195	A0A833S7R5	A0A833S7R5_9HYME	Twitchin	Frieseomelitta varia	818104	anatomical structure morphogenesis [GO:0009653]; cell differentiation [GO:0030154]; protein phosphorylation [GO:0006468]	ATP binding [GO:0005524]; protein kinase activity [GO:0004672]; anatomical structure morphogenesis [GO:0009653]; cell differentiation [GO:0030154]; protein phosphorylation [GO:0006468]	ATP binding [GO:0005524]; protein kinase activity [GO:0004672]		Protein kinase superfamily, CAMK Ser/Thr protein kinase family	Frieseomelitta (genus), Meliponini (tribe), Apinae (subfamily), Apidae (family), Apoidea (superfamily), Aculeata (infraorder), Apocrita (suborder), Hymenoptera (order), Endopterygota (cohort), Neoptera (infraclass), Pterygota (subclass), Dicondylia (no rank), Insecta (class), Hexapoda (subphylum), Pancrustacea (no rank), Mandibulata (no rank), Arthropoda (phylum), Panarthropoda (no rank), Ecdysoz…

## Sheet: 45_Proteins
45 proteins from UniProtKB/TrEMBL accession on 2023.06.02. UniProtKB/TrEMBL contains protein sequences associated with computationally generated annotation and large-scale functional characterization that await full manual annotation. Once in UniProtKB/Swiss-Prot, the protein entry is removed from UniProtKB/TrEMBL.
Black protein names show the non-dysregulated proteins between the Vespa crabro gynes and workers venom sac extracts
Green protein names show the upregulated proteins in the Vespa crabro gyne venom sac extract
Red protein names show the downregulated proteins in the Vespa crabro gyne venom sac extract
n	Entry	Entry Name	Protein names
1	K4WKC0	K4WKC0_ECOLX	Enolase OS=Escherichia coli O111:H11 str. CVM9455 OX=1165939 GN=eno PE=3 SV=1
2	A0A6P3U365	A0A6P3U365_BOMTE	uncharacterized protein LOC100642610 OS=Bombus terrestris OX=30195 GN=LOC100642610 PE=4 SV=1
3	A0A6P5I2P0	A0A6P5I2P0_BOMTE	Calcium-transporting ATPase OS=Bombus terrestris OX=30195 GN=LOC100642652 PE=3 SV=1
4	A0A6P3DPJ9	A0A6P3DPJ9_BOMTE	alpha-glucosidase OS=Bombus terrestris OX=30195 GN=LOC100649281 PE=4 SV=1
5	A0A6P3DFV2	A0A6P3DFV2_BOMTE	carbonyl reductase (NADPH) OS=Bombus terrestris OX=30195 GN=LOC100643942 PE=4 SV=1
6	A0A6P5HFS8	A0A6P5HFS8_BOMTE	Phosphotransferase OS=Bombus terrestris OX=30195 GN=LOC100646701 PE=3 SV=1
7	A0A6P3DLV5	A0A6P3DLV5_BOMTE	heat shock protein beta-1 isoform X2 OS=Bombus terrestris OX=30195 GN=LOC100644627 PE=3 SV=1
8	A0A6P5I5Q8	A0A6P5I5Q8_BOMTE	Alpha-1,4 glucan phosphorylase OS=Bombus terrestris OX=30195 GN=LOC100642931 PE=3 SV=1
9	A0A6P3UBY6	A0A6P3UBY6_BOMTE	Transgelin OS=Bombus terrestris OX=30195 GN=LOC105666555 PE=3 SV=1
10	A0A6P3U6Y5	A0A6P3U6Y5_BOMTE	lamin-C isoform X2 OS=Bombus terrestris OX=30195 GN=LOC100648485 PE=3 SV=1
11	A0A6P3DG00	A0A6P3DG00_BOMTE	LOW QUALITY PROTEIN: protein dj-1beta OS=Bombus terrestris OX=30195 GN=LOC100652254 PE=4 SV=1
12	A0A6P3U6D2	A0A6P3U6D2_BOMTE	alpha-actinin, sarcomeric isoform X1 OS=Bombus terrestris OX=30195 GN=LOC100652204 PE=3 SV=1
13	A0A6P3DDE1	A0A6P3DDE1_BOMTE	Glyceraldehyde-3-phosphate dehydrogenase OS=Bombus terrestris OX=30195 GN=LOC100648830 PE=3 SV=1
14	A0A6P5I2Y9	A0A6P5I2Y9_BOMTE	twitchin isoform X2 OS=Bombus terrestris OX=30195 GN=LOC100644118 PE=3 SV=1
15	A0A6P3DB16	A0A6P3DB16_BOMTE	actin-interacting protein 1 isoform X1 OS=Bombus terrestris OX=30195 GN=LOC100645373 PE=4 SV=1
16	A0A6P5I4V8	A0A6P5I4V8_BOMTE	troponin T, skeletal muscle isoform X3 OS=Bombus terrestris OX=30195 GN=LOC100648673 PE=3 SV=1
17	A0A6P3UJ80	A0A6P3UJ80_BOMTE	Lactoylglutathione lyase OS=Bombus terrestris OX=30195 GN=LOC105667111 PE=3 SV=1
18	A0A6P3DJM2	A0A6P3DJM2_BOMTE	Malic enzyme OS=Bombus terrestris OX=30195 GN=LOC100642264 PE=3 SV=1
19	A0A6P3UJ18	A0A6P3UJ18_BOMTE	heat shock 70 kDa protein 4 isoform X2 OS=Bombus terrestris OX=30195 GN=LOC100646893 PE=3 SV=1
20	A0A6P3UDI8	A0A6P3UDI8_BOMTE	UTP--glucose-1-phosphate uridylyltransferase OS=Bombus terrestris OX=30195 GN=LOC100642664 PE=3 SV=1
21	A0A6P3TVX5	A0A6P3TVX5_BOMTE	1,4-alpha-glucan branching enzyme OS=Bombus terrestris OX=30195 GN=LOC100650166 PE=3 SV=1
22	A0A6P3U6Z7	A0A6P3U6Z7_BOMTE	Phosphoglycerate kinase OS=Bombus terrestris OX=30195 GN=LOC100645172 PE=3 SV=1
23	A0A6P3DM36	A0A6P3DM36_BOMTE	Multifunctional fusion protein OS=Bombus terrestris OX=30195 GN=LOC100642390 PE=3 SV=1
24	A0A6P5I3R1	A0A6P5I3R1_BOMTE	alpha-L-fucosidase OS=Bombus terrestris OX=30195 GN=LOC100644255 PE=3 SV=1
25	A0A6P3D672	A0A6P3D672_BOMTE	phosphoenolpyruvate carboxykinase (GTP) OS=Bombus terrestris OX=30195 GN=LOC100631088 PE=3 SV=1
26	A0A6P3D7Q5	A0A6P3D7Q5_BOMTE	cytochrome c OS=Bombus terrestris OX=30195 GN=LOC100648549 PE=3 SV=1
27	A0A6P3TVX4	A0A6P3TVX4_BOMTE	myosin heavy chain, muscle isoform X28 OS=Bombus terrestris OX=30195 GN=LOC100647343 PE=3 SV=1
28	A0A6P5IEK0	A0A6P5IEK0_BOMTE	muscle LIM protein Mlp84B isoform X1 OS=Bombus terrestris OX=30195 GN=LOC100646273 PE=4 SV=1
29	A0A6P3DIG8	A0A6P3DIG8_BOMTE	glutamate dehydrogenase [NAD(P)(+)] OS=Bombus terrestris OX=30195 GN=LOC100650055 PE=3 SV=1
30	A0A6P3U2G4	A0A6P3U2G4_BOMTE	uncharacterized protein LOC100647860 isoform X1 OS=Bombus terrestris OX=30195 GN=LOC100647860 PE=4 SV=1
31	A0A6P3DGE5	A0A6P3DGE5_BOMTE	serine protease 53-like OS=Bombus terrestris OX=30195 GN=LOC100650014 PE=4 SV=1
32	A0A6P5HR09	A0A6P5HR09_BOMTE	LOW QUALITY PROTEIN: titin OS=Bombus terrestris OX=30195 GN=LOC100643650 PE=3 SV=1
33	A0A6P3UK05	A0A6P3UK05_BOMTE	Annexin OS=Bombus terrestris OX=30195 GN=LOC100650720 PE=3 SV=1
34	A0A6P3D7P7	A0A6P3D7P7_BOMTE	transketolase-like protein 2 isoform X2 OS=Bombus terrestris OX=30195 GN=LOC100649799 PE=4 SV=1
35	A0A6P3DG53	A0A6P3DG53_BOMTE	uncharacterized protein LOC100650291 isoform X1 OS=Bombus terrestris OX=30195 GN=LOC100650291 PE=4 SV=1
36	A0A6P3D7G6	A0A6P3D7G6_BOMTE	Succinate--CoA ligase [ADP/GDP-forming] subunit alpha, mitochondrial OS=Bombus terrestris OX=30195 GN=LOC100652037 PE=3 SV=1
37	A0A6P3TYQ7	A0A6P3TYQ7_BOMTE	paramyosin, long form OS=Bombus terrestris OX=30195 GN=LOC100644720 PE=4 SV=1
38	A0A6P3DGF4	A0A6P3DGF4_BOMTE	Phosphoglycerate mutase OS=Bombus terrestris OX=30195 GN=LOC100651143 PE=3 SV=1
39	A0A6P3U581	A0A6P3U581_BOMTE	tropomyosin isoform X9 OS=Bombus terrestris OX=30195 GN=LOC100650354 PE=3 SV=1
40	A0A6P5I3K1	A0A6P5I3K1_BOMTE	laminin subunit beta-1 isoform X3 OS=Bombus terrestris OX=30195 GN=LOC100642555 PE=4 SV=1
41	A0A6P3UHF6	A0A6P3UHF6_BOMTE	chitinase-like protein Idgf4 isoform X2 OS=Bombus terrestris OX=30195 GN=LOC100650230 PE=3 SV=1
42	A0A6P3UBI7	A0A6P3UBI7_BOMTE	Transferrin OS=Bombus terrestris OX=30195 GN=LOC100650460 PE=3 SV=1
43	A0A6P3DHD5	A0A6P3DHD5_BOMTE	Pyruvate dehydrogenase E1 component subunit alpha OS=Bombus terrestris OX=30195 GN=LOC100643255 PE=4 SV=1
44	A0A6P3UCY2	A0A6P3UCY2_BOMTE	Aspartate aminotransferase OS=Bombus terrestris OX=30195 GN=LOC100649476 PE=3 SV=1
45	A0A6P3DG49	A0A6P3DG49_BOMTE	Calponin OS=Bombus terrestris OX=30195 GN=LOC100646158 PE=3 SV=1
